# Supplementary material
Source: PubMed Central journal article supplement (PMC3801024)
Supplement: 1307090110_sapp.pdf [file 1307090110_sapp.pdf]

## **Supplementary Appendix:**

### **A high level of inter-genera gene exchange shapes the evolution of haloarchaea in an isolated Antarctic lake**

Matthew Z. DeMaere, Timothy J. Williams, Michelle A. Allen, Mark V. Brown, John A.E. Gibson, John Rich, Federico M. Lauro, Michael Dyll-Smith, Karen W. Davenport, Tanja Woyke, Nikos Kyrpides, Susannah G. Tringe and Ricardo Cavicchioli

#### **Supplementary Text**

Results and Discussion

Materials and Methods

#### **Supplementary Figures S1-S15**

#### **Supplementary Tables S1-S11**

#### **Supplementary References**

## Results and Discussion

**Fragment recruitment (FR), highly degenerate regions and reference mapping.** 454 sequencing was performed on the 0.1  $\mu\text{m}$  fraction from the 5, 13 and 24 m depths, the 0.8 and 3.0  $\mu\text{m}$  fractions from 24 m, and all 3 fractions pooled together for the 36 m depth (Table S1). Illumina sequencing was performed on the 0.8 and 3.0  $\mu\text{m}$  fractions from the 24 m depth. FR was performed individually on each dataset and carried out against all publically available complete and draft bacterial, archaeal and viral genomes from NCBI, all organelle genomes from EHL and the four DL haloarchaea (tADL, DL31, *Hl* and DL1). The only eucaryal reference examined was a halophilic green alga *Dunaliella salina* CCAP 19/18 (<http://genomesonline.org/cgi-bin/GOLD/bin/GOLDCards.cgi?goldstamp=Gi13840>).

Genomes were analysed independently using FR-Hit and the resulting combined set of read assignments across all genomes was reduced to a non-redundant set by selection of the single longest and highest identity alignment per read, where alignments were filtered by application of a stringency test (read coverage > 90%, identity > 98%). From eight million 454 Titanium reads, the four DL haloarchaea were the four most abundant organisms recruiting 28.3% of all reads and represent 94.4% of all recruited reads. Raw draft *Dunaliella* sp. sequence recruited 131949 reads, however upon inspection it was clear that recruited reads were almost exclusively aligned to low complexity repeat regions within the draft sequence. After masking low complexity sequence (RepeatMasker v3.3.0 using `-noint`) recruitment to *Dunaliella salina* dropped to 1857 reads, making a distant 5<sup>th</sup> in abundance (0.08%). In a further wider step, no reads were recruited to 3900 publically available organelle genomes from EMBL. Recruitment to DL1 primary replicon Contig38 was observed to be concentrated largely (63% of assigned reads) along an 80 kb region (380..460 kb) with mean read-depth of 54.2, outside of this region mean read-depth fell to 2.5 suggesting that the majority of recruiting reads were of other genomic origin. In view of the relative abundance of SSU rRNA gene pyrotag matches to *Dunaliella* 18S and chloroplast 16S rRNA gene sequences, the lack of FR from the metagenomic datasets suggests that DL *Dunaliella* have genomes that are quite different to those chromosome or chloroplast genomes of *Dunaliella* sp. that have been sequenced.

The proportion of mapped reads is very stable for the four dominant organisms, all of which are known to exist within the lake. The tail of weakly recruiting species however, is sensitive to the stringency filter. There is a six-fold increase in the number of weakly recruiting organisms (recruiting < 1%) when lowering the stringency (read coverage > 75%, identity > 80%), while the number of reads recruited increases to 38.2%. In relative proportion, the tail is dominated by haloarchaea assignments (10 of the next 15 organisms) accounting for 82.9% of recruited reads in the tail. The tail included hits to organisms and viruses that are not likely to be present in DL (*e.g.* insect virus). These read assignments provide little value in determining their biological origin, and hence possible contribution to the ecosystem.

For the 0.1  $\mu\text{m}$  filter size the abundance profile has little variation across depths (5, 13 and 24 m) (Fig. S5). For a constant depth (24 m), the 0.8  $\mu\text{m}$  and 3.0  $\mu\text{m}$  fractions compared to 0.1  $\mu\text{m}$  were enriched for DL31, indicating DL31 cells in DL are likely to be relatively large thereby partitioning on the larger size filters. The 36 m sample (pooled

size fractions) had a similar profile to the other depths, although the proportion of tADL was somewhat lower. Overall recruitment changed little by depth or filter size across the lake. As DL is effectively homogeneous in community profile reads were pooled for most read-based analyses. This profile for the lake was also reflected in the SSU pyrotag data (Fig. S2-S5).

FR revealed short regions (1-2 kb) of high degeneracy within the metagenome, where local read-depth greatly exceeded the replicon global median. Genomic coordinates of all such degenerate regions were determined by application of peak detection to replicon read-depth traces (read depth > 3-fold median read-depth) and subsequently reduced to a non-redundant set by clustering with CD-hit at 98% identity. Of the initial 197 individual sequences with mean read-depth of 2850, 15 unique sequence clusters were determined with a total extent of 21,747 bp, representing 4.8% (111,095) of all recruited reads. The distribution of occupancy follows an 80/20 power-law with the largest 3-4 clusters comprising 75-80% of extracted sequences. Annotation by BLASTX against Refseq\_protein identified 14 of 15 clusters as insertion sequences (ISs), with the remaining single-sequence cluster identified as a conserved hypothetical found in haloarchaea. DL metagenomic reads were subsequently filtered for these highly degenerate sequences and FR repeated. The resultant recruitment plots (Fig. 1 and Fig. S7) show pronounced holes in recruitment depth, which also coincide with those from gsMapper derived reference mapping (detailed below).

A bipartite association network of degenerate cluster to replicon helps to show that the four largest clusters cl\_8 (ISH1a1), cl\_1 (ISH1a6), cl\_0 (ISH1a7) and cl\_6 (ISDL31\_7; newly defined in DL) are highly connected across the replicons of all four isolate genomes (out degree: 8, 5, 7, 4 respectively) (Fig. 3). Though no cluster is fully associated with all nine replicons, taken at the genome level, clusters cl\_8 and cl\_0 are fully associated with all four genomes. Considering the network in reverse perspective, tADL, *Hl* and DL31 are the most highly connected genomes (weighted in-degree: 58, 44, and 43) while DL1 (weighted in-degree: 14) primarily associates with cl\_8 and only weakly with cl\_0 and cl\_6. Note that for clarity the Fig. S13 has been filtered to exclude weak (low weight) edges (e.g. between DL1 and cl\_0 and cl\_6).

Ranked by decreasing weighted in-degree, genome order is conserved as cluster nodes are deleted from the network in order of increasing out-degree, changing dramatically only when reduced to a single node (cl\_8). This highlights the relative strength of association between tADL and the second largest cluster cl\_1; three-fold greater than the other three genomes combined associative weight with cl\_1.

By weighted in-degree, the tADL main chromosome (WID: 61, Contig32) possesses 31% of all edges in the network, making it both the most significant primary replicon and most significant replicon overall, followed by secondary replicons from DL31 (WID: 20, Contig115) and *Hl* (WID: 17, NC\_012030). Secondary replicons from DL31 and *Hl* possess approximately two-fold more edges than their respective main chromosomes. Despite having no such secondary replicon, the most abundant organism tADL manages to accommodate the community majority of ISs.

As 70% of reads were unassigned in FR, a question addressed was whether the very high read-depth of degenerate regions was accounted for simply by the combined contribution of the four isolate genomes. A self-consistency check of observed cluster read-depth was obtained by the linear combination,

$$d_{pred} = \sum_i n_i d_i$$

$$\Delta d = d_{pred} - d_{obs}$$

where  $n_i$  is per-replicon cluster copy number,  $d_i$  the robust estimate of replicon read-depth, and  $i$  iterates over all replicons.

Although there is some discrepancy between observation and prediction for cl\_8 and cl\_1, the majority of observed read-depth is explained by copy number and replicon superposition. For cl\_0 however, roughly 40% of observed read-depth was not explained by replicon superposition and was attributable to a 5<sup>th</sup> genome (see **Whole metagenome assembly** below).

Reference mapping was performed with GS Reference Mapper v2.6 for each genome against all DL samples. Estimated distributions of read-depth for each replicon show that primary replicons for DL31, *Hl* and tADL (Contig115, NC\_012029 and Contig32) are smooth and unimodal with median values of 74-, 36- and 221-fold, while as seen in FR, DL1 only maps reads in significant depth in one 80 kb region. Secondary replicon read-depth distributions appear as a superposition of multiple stochastic processes, where regions of degenerate sequence cause high levels of variability (Fig. 1 and Fig. S7).

**SNP and recombination analysis.** Ninety million reads comprised of two paired-end Illumina lanes from 24 m depth (0.8  $\mu$ m and 3.0  $\mu$ m) were aligned with Bowtie to the four DL haloarchaea genomes following recent methodology (1). Of the 45.6 million reads (49.5%) which were mapped; 50.9% were assigned to tADL, 29.8% to DL31, 16.3% to *Hl* and 3.0% to DL1. Mean recruited read-depths for primary replicons were tADL 530, DL31 301, *Hl* 112, and DL1 14. In the case of DL1, mean read-depth is a deceiving measure as nearly all reads were recruited to a single short region (380 kb..460 kb) while elsewhere read-depth was close to zero.

SNPs with mapped read-depth above 20-fold and variant frequency above 0.9 were considered fixed mutations within the DL population (Table S6). The proportion of fixed SNPs within intergenic or coding regions was in proportion to the number of coding bases in each case (Fisher exact p-values: tADL 0.153, DL31 0.624, *Hl* 0.732, DL1 n/a). Four way contingency tables of reference to variant base demonstrated a bias towards transitions ( $A \leftrightarrow G$ ,  $C \leftrightarrow T$ ) for all main chromosomes (tADL 71.7%, DL31 81.9%, *Hl* 59.2%, DL1 n/a).

High numbers of signal transduction genes (T) and transcriptional regulation genes (K) were reported in *Leptospirillum* populations in acid mine drainage biofilms (1). For the dominant DL organism tADL, the most highly assigned category is “general function prediction only” (R), followed by “energy production and conversion” (C) (Table S7).

Estimating substitution rate,

$$\theta \cong N_{SNP} / N_{gen} / \ell_{genome}$$

Using *Hl* growth rates and DL annual temperature profile (2,3) a power-law regression can be used to model generation time  $T_{gen}$  as a function of lake temperature  $t_{lake}$ .

$$T_{gen} \cong At_{lake}^{-2.503}$$

Where  $A = 43829$  and  $R^2 = 0.99565$ .

This model predicts that there are only three months in a year (January, February and December) during which time the lake has discernible haloarchaeal growth. Generation times for these productive months (179, 773 and 999 hours respectively) equates to 5.77 generations per year. This is 100-fold fewer generations annually than in the case of acid mine drainage biofilms<sup>1</sup> where  $T_{gen} = 0.0017 \text{ yr}^{-1}$  or 588 generations per year, where the newly emerged bacterial hybrids have demonstrated ecological success.

Because of this slow growth rate in DL, the inferred substitution rate  $\theta$  of DL haloarchaeal species by this method would be extremely high. Additionally, regions of highly degenerate sequence do not account for the observed fixed number of SNPs.

PIIM v2.02 was used to infer scaled rates of mutation and recombination ( $\theta = 2N_e\mu, \rho = 2N_e c$ ) for each DL isolate replicon. PIIM's pre-generated likelihood lookup table limits read-depth to 50-fold, therefore requiring downsampling of our data. Downsampling by random selection was performed using Picard v1.77 and BAM to ACE format conversion accomplished using Consed v23. Rates were estimated in sliding 50 kb windows and resampling repeated ten times with randomly selected seeds. Confidence intervals (95% CI) for  $\theta, \rho$  were estimated by bootstrapping in R (N=10,000) using the boot package. Rates estimation in PIIM was performed using the likelihood lookup table for  $\theta = 0.1$ , since as many as 25% of predictions resulted in  $\rho = \infty$  when using the likelihood table for  $\theta = 0.01$ . DL1 was excluded from this analysis due insufficient coverage.

Confidence intervals for primary replicons were: tADL Contig32 ( $\theta = 0.0088, 0.0091$ ) ( $\rho = 0.0307, 0.0340$ ); DL31 Contig115 ( $\theta = 0.0258, 0.0264$ ) ( $\rho = 0.0209, 0.0232$ ); *HI* NC\_012029 ( $\theta = 0.0376, 0.0390$ ) ( $\rho = 0.0386, 0.0426$ ). Confidence intervals for secondary replicons were: DL31 Contig114 ( $\theta = 0.0224, 0.0290$ ) ( $\rho = 0.0214, 0.0286$ ); *HI* NC\_012028 ( $\theta = 0.0219, 0.0257$ ) ( $\rho = 0.0242, 0.341$ ); *HI* NC\_012030 ( $\theta = 0.0238, 0.0267$ ) ( $\rho = 0.0192, 0.0282$ ). As the length of DL31 Contig113 was less than 50kb, only 10 estimations were determined for each parameter and consequently only means were determined ( $\theta = 0.0208 \pm 0.0008$ ) ( $\rho = 0.0434 \pm 0.0043$ ).

The predicted range of the ratio of rates ( $\rho/\theta$ ) suggests that genetic variability within tADL (3.37,3.86) occurs at a ~4-fold higher rate by recombination than mutation, whereas for the primary replicons in DL31 (0.79,0.90) and *HI* (0.99,1.13) the suggestion is that the rates are approximately equivalent sources of variability. For longer secondary replicons (Contig114, NC\_012028, NC\_012030) the ratio of rates is also close to unity (DL31 Contig114: 0.74, 1.28; DL31 Contig113: 2.09; *HI* NC\_012028: 0.94, 1.56; *HI* NC\_012030: 0.72, 1.18). While the genome variation occurring via ISs and long high identity regions (HIR; see **High identity regions** below) provides information about the extent of genome variation in the DL haloarchaea, these ratio values indicate about the relative contribution of recombination and mutation. The low rate of mutation vs recombination in tADL may indicate that the fidelity of point mutation repair is superior in tADL compared to DL31 and *HI*.

**CAI/CBI.** Codon adaptation and codon bias indexes (CAI/CBI) for each genome were determined by CodonW, where putative optimal codons sets are determined by a two way Chi-squared contingency test of the two extremes of the principle trend of a correspondence analysis.

As validation, CAI/CBI values of 77 suspected highly expressed proteins in *Hl* (4) were compared against those of the whole main chromosome. Median CAI/CBI for the whole chromosome were 0.620/0.652, while for the 77 highly expressed proteins 0.723/0.781; whole *vs* highly expressed distributions differed significantly (Mann-Whitney two tailed,  $n_1=2723$ ,  $n_2=77$ , CAI  $U=29352$ , p-value  $2.2e-16$  and CBI  $U=19465$  p-value= $2.2e-16$ ). Though a clear bias towards optimality is evident, this set of highly expressed proteins could not be used for codon weighting parameter estimation ( $w_i$ ) due to amino acid under-sampling.

Comparison of putative optimal codon sets between the four genomes shows a high degree of overlap, where 21 of 25 predicted codons (conserved ratio 0.84) are identical. Compared against the archaeal hyperthermophile *Thermoproteus neutrophilus* V24Sta, the number of conserved codons decreases to 18 of 28 (conserved ratio 0.64). Classical multidimensional scaling (MDS) of an Euclidean distance matrix of estimated parameters ( $w_i$ ) shows DL1 and *Hl* to be the most similar, while DL31 and tADL are increasingly separated and the expected outlier *T. netriphilus* the furthest removed.

Secondary replicons within the DL genomes show consistently lower CAI and CBI than the main replicon. Additionally, the primary replicons of tADL and DL1 possess extended regions of low CAI/CBI scoring genes (Fig. 1 and Fig. S7) some of which also contain HIR (see **High identity regions** below). These regions often coincide with strong variations in FR and increased density of mobile elements. This could be considered as evidence of recent incorporation and high volatility.

**Ortholog groups.** Thirteen haloarchaeal genomes (*Haladaptatus paucihalophilus* DX253; *Halalkalicoccus jeotgali* B3, DSM 18796; *Haloarcua marismortui* ATCC 43049; *Halobacterium salinarum* R1, DSM 671; *Halobacterium* sp. NRC-1; *Haloferax volcanii* DS2, ATCC 29605; *Halogeometricum borinquense* PR3, DSM 11551; *Halomicrobium mukohataei* arg-2, DSM 12286; *Haloquadratum walsbyi* HBSQ001, DSM 16790; *Halorhabdus utahensis* AX-2, DSM 12940; *Haloterrigena turkmenica* DSM 5511; *Natrialba magadii* ATCC 43099; *Natronomonas pharaonis* Gabara, DSM 2160) were included together with the four DL genomes in an ortholog cluster analysis. Ortholog clusters were determined using OrthoMCL (v2.0.2) where granularity (-I 1.4) was adjusted for best agreement between the resultant clusters and known single copy genes (*e.g.* ribosomal proteins, tRNA synthetases). From 52973 genes there were 6343 predicted ortholog clusters, 723 containing only one gene from each of the 17 genomes, which increased to 889 when constraints were reduced to allow an absence in one genome. Freeing the constraint on copy number to be greater than one, there were 894 clusters conserved in one or more copies per genome across all 17 haloarchaea, which increased to 1062 when constraints were again relaxed to permit one absent genome. Cluster function was inferred by homology to Archaeal COGs, where HMMER version 2.3.2 was used to create profile HMMs for each group from Clustalw2 multiple sequence alignments and ArCOG assignment decided by a simple voting heuristic.

The 894 ortholog clusters shared across all 17 genomes were used to define the core haloarchaeal gene content. The breakdown of functional classification for essential gene content was in agreement with other recent work (5) where 11% are involved in cellular processes and signalling, 30% in information storage and processing, 32% in metabolism, 13% general function prediction only and 15% poorly characterized (Fig. S8). When mapped to the Archaeal arCOGs using a similar voting heuristic as used in COG assignment, there was a 1:1 relationship for 754 ortholog clusters, 104 clusters mapped 2:1 to 52 arCOGs, with the remaining 36 mapped at higher degrees (24 in 3:1, 12 in 4:1), indicating somewhat finer cluster granularity in our work.

So defined, core genes were rarely located on DL secondary replicons. To explore what persistent contribution secondary replicons might make to the gene repertoire of DL haloarchaea, 68 ortholog groups were selected which possessed at least one secondary replicon member from each DL haloarchaea and also a member from tADL. This set was regarded as conserved but potentially non-core gene content. The largest ortholog groups within this set were associated with ISs (ISH3, ISH4 and ISH6 families) with sizes (72, 27 and 19) which were much greater than was typical (mean size = 9, median size = 7). The next most abundant ortholog groups included COG functional groups for transcription (K), replication, recombination and repair (L), defence mechanisms (V), inorganic ion transport (P), intracellular trafficking (U) and cell cycle, division and partitioning (D) (Fig. S9).

**Selection - Ka/Ks ratios ( $\omega$ ).** The selective pressure of haloarchaeal genes was considered both within and between populations. Single copy ortholog pairs were identified between tADL and *Hl* (within population) and tADL and *H. volcanii* (between populations). Clustalw2 was employed for multiple sequence alignment and  $\omega$  was estimated by KaKs\_calculator using AICc model selection (-m MS). For 843 within population and 842 between population ortholog pairs (mean  $\omega$ : 0.065 and 0.062 respectively), none were found with  $\omega > 1$  and only 8 within population and 7 between population had  $\omega > 0.3$ . The apparent distributional similarity for within and between population  $\omega$  values (Kolmogorov-Smirnov D=0.04, p-value=1) suggests that core gene content is under similar purifying selective pressure irrespective of environment.

**Whole metagenome assembly.** The whole metagenome of DL was assembled using Celera WGS (v6.1), with the recommended component pipeline for 454 Titanium data. An initial assembly was performed with default runtime parameters, with the exception of 3.0% unitigger error rate. Celera WGS estimation of genome size and consequently its effect on the discriminating statistic (a-stat) categorising early contigs as degenerate (repeats) performs poorly on datasets which do not represent a single organism. The tendency to over-estimate genome size leads to an increase in false positive rate of degenerates. To mitigate its effect, genome size was reduced manually by two-fold and the assembly repeated post-overlap stage. This was repeated iteratively until the rate of change in degenerate assignment began to slow. The previous step was then taken as the final result. In the case of the DL metagenome, genome size was reduced 4-fold from the predicted 88 Mb to 22 Mb. From 6,626,699 usable reads, assembly resulted in 16,551 contigs (mean length = 2736 bp), 634 large contigs (> 10 kb) totalling 12 Mb in total length and 15917 small contigs totalling 33 Mb in total length. An additional 61 large

contigs (> 10 kb) classified as degenerate due to high read- depth (mean read-depth = 200) were also included.

For assembled contigs the low complexity of the DL metagenome permits inference of replicon source by cluster analysis in a two-dimensional space composed of GC content and mean read-depth (Fig. S10). Restricted to lengths greater than 15 kb, contigs belonging to each primary replicon of the three abundant isolate genomes were first identified by stringent BLASTN assignment (coverage > 90%, e-value <  $10^{-10}$ ). The mean GC and read-depth of each of these labelled clusters is in agreement with values inferred from FR and reference genomes. Model based clustering using Mclust was performed in R with background Poisson noise to compensate for the presence of outliers belonging to no cluster. As tADL contigs are clearly separated, this step was limited to a subspace ( $20 < \text{read-depth} < 100$ ) containing only three clusters (DL31, *Hl* and the unlabelled cluster) (Fig. S11). The unlabelled cluster (center: GC=0.63, RD=38.3) comprises 52 large contigs (> 15 kb) totalling 1.89 Mb in total extent, subsequently referred to as the “tADL-related 5<sup>th</sup> genome”.

tADL is the nearest relative with an average nucleotide identity (ANI) of 0.802 (1.08 Mb aligning) and TUD (tetranucleotide usage deviation) regression of 0.959. Against tADL, NUCMER reports 492 gapped alignments totalling 806,411 bp with an average identity of 85.2%, while CONTIGuator maps 48 of 52 contigs (Fig. S12) or 1.82 Mb in total extent with 28.8% identity. Coverage across the tADL primary replicon correlates inversely with regions identified as putative genomic islands rich in non-core gene content (Fig. 2 and Fig. S7).

Annotation of the “tADL-related 5<sup>th</sup> genome” using SHAP predicted 1889 putative full length genes. Genomic content was inferred by orthologous group assignment, where each gene was scanned against the orthologous group profile HMM library using hmmpfam (e-value <  $10^{-10}$ ). This classified 873 genes (46%) as core gene content, covering 76% of orthologous groups, while 40 genes (2%) were assigned as non-core gene content. The proportion of core to non-core gene content and substantial coverage of the tADL primary replicon is highly suggestive that these contigs are likely to be of primary replicon origin.

**Similarity comparison.** ANI and TUD regression coefficients were determined between all replicons with JSpecies along with the “tADL-related 5<sup>th</sup> genome” for comparison (Table S8). Genomes with similarity scores of greater than 0.96 ANI or 0.98 TUD can be considered the same species.

The spread in similarity score distribution across the primary replicons is roughly 7-fold greater for TUD regression ( $0.830 \pm 0.065$ ) than ANI ( $0.721 \pm 0.0084$ ). Calculation of ANI relies upon BLAST alignments which may cover as little as 20% of the full replicon length, while TUD regression is inclusive of the whole genome and is independent of any preliminary homology search, suggesting perhaps TUD regression has a greater sensitivity in this case.

Primary replicons for DL1 and DL31 show the greatest similarity in TUD regression coefficient (0.945) but are otherwise unremarkable in ANI (0.715). The “tADL-related 5<sup>th</sup> genome” is most similar to tADL (ANI=0.808, TUD=0.959) but would not be considered the same species by conventional definition.



**High identity regions.** Though the DL haloarchaea genomes typically possess ~80% ANI, there exist many regions longer than 5 kb of much higher inter-replicon sequence conservation (>99%). Experimental validation by PCR amplification and sequencing confirmed the presence of HIR in their respective genomes (see **PCR and DNA sequencing confirmation of HIR** below).

Thirty regions longer than 5 kb are shared across seven of the nine isolate replicons (DL1: Contig37 and Contig38, DL31: Contig114 and Contig115, *HI*: NC\_012028, NC\_012030 and tADL: Contig32) and thirteen regions longer than 10 kb are shared between six (DL1: Contig37 and Contig38, DL31: Contig114 and Contig115, *HI*: NC\_012028 and tADL: Contig32). BLASTN search of regions longer than 10 kb against Refseq\_genomic showed that only DL haloarchaea possess sequence identity above 95%, with resultant mean query length 5033 bp. Significant hits below the 95% identity threshold approximated a normal distribution on identity ( $\mu=86.3\%$ ,  $\sigma=3.4\%$ ), possessed mean query length 1317 bp and were associated with haloarchaeal mobile elements.

Represented as a network with replicons as nodes and edges weighted by summation of region lengths over 5 kb (Fig. 3b), the most significant node is for replicon *HI* NC\_012028; ranked first both by normalized weighted degree (0.374) and normalized betweenness centrality (0.567). The top three most significant edges (normalized weights: 0.323, 0.182, 0.161) are intergenic links from *HI* NC\_012028 to DL31 Contig114, DL1 Contig38 and Contig37. From a genomic perspective, *HI* and DL1 share regions of conserved sequence (>5 kb) with all three other lake isolates (degree 3), while DL31 and tADL share regions with only two other genomes (degree 2).

The identification of HIR raised the question of how novel the finding was, and what would be observed across the many sequenced haloarchaeal species and hypersaline haloarchaea-enriched environments for which metagenomic data exists. To answer this question, an all-vs-all analysis was carried out between 25 finished HA genomes (Table S9). ANI by BLAST was determined using JSpecies and the total extent in base-pairs of long shared HIR was determined using NUCMER. For HIR, only alignments greater than 99% identity and longer than 2000bp were considered, where the length criteria was chosen to minimise bias attributable to short, possibly well conserved mobile elements such as ISs. The total length of the resulting alignments were then summed for each genome-pair. Two symmetric "comparison" matrices of genome-pair values for ANI and  $L_{HIR}$  were constructed. Due to the large value range and presence of zeros,  $L_{HIR}$  matrix elements were transformed by  $x'_{ij} = \log_{10}(x_{ij} + 1)$  prior to further steps.

Matrix element definitions for each of the two matrices:

$$ANI_{i,j} = ANI(genome_i, genome_j)$$

$$L_{HIR_{i,j}} = \log_{10} \left( \sum_{n=1}^n length_{i,j,n} + 1 \right)$$

Heatmaps (Fig. 4 and Fig. S14) were produced for both ANI and  $L_{HIR}$ , where hierarchical clustering of Euclidean distances was used to reorder rows and columns for minimum variance (Wards method).

Excluding self-self comparisons along the diagonal, the median global ANI of 71.3% correlates well with the primary mode within their distribution (Fig. S14B, red line). Prominent block clusters within the ANI exist, where more closely related genomes occur adjacently: *H.salinarum* and NRC-1 (>99%), *H.walsbyi* and *H.walsbyi\_C23* (98.7%), *H.hispanica* and *H.marismortui* (90.6%), *H.volcanii* and *H.mediterranei* (82.4%). A larger block of seven genomes also exhibits collective similarity: Nat\_J7-2, *H.turkmenica*, *H.xanaduensis*, *N.pellirubrum*, *N.occultus*, *N.gregoryi*, *N.magadii* (median ANI 78.5%) producing an observable peak with the distribution of ANI (Fig. S14B, blue line). Comparisons between the two *H.walsbyi* species and the other 23 genomes show that the *H.walsbyi* are systematically more distantly related (median ANI 64.8%) (Fig. S14B, green line). For the DL isolate genomes (tADL, DL31, *H.lacusprofundi* and DL1) the median ANI 73.1 % (Fig. S14B, light blue line). Fitting a normal model to the primary mode within the ANI distribution by expectation maximisation ( $\mu=71.2$ ,  $\sigma=1.4$ ), only the DL isolates ANI can be considered not significantly different from the mean (p-value = 0.09).

The DL isolates between each other exhibit a median ANI not significantly different from the global median between all 25 haloarchaeal genomes, while at the same time there exist other genome-pairs with ANI significantly different than the global median and closer to unity. Not all of these more closely related genome-pairs possess HIR, while all six possible genome-pair combinations between the four DL isolates do, suggesting that HIR are a peculiar feature of the DL community -- not observed in other haloarchaea whose complete genomes are currently available.

For the  $L_{HIR}$  heatmap (Fig. 4 and Fig. S14C), the majority of matrix elements are zero as there exist no alignments of sufficient identity and length between genome pairs. Of the 9 genome-pairs which contain HIR regions, 3 pairs are from closely related organisms (>90% ANI): *H.walsbyi* and *H.walsbyi\_C23*, *H.salinarum* and NRC-1, *H.hispanica* and *H.marismortui*. The remain 6 genome-pairs possessing HIR regions involve only DL isolates and represent the full complement of possible pair-wise combinations. The total length of HIR shared between the four DL genomes ranged from 6,561 to 138,307 bp (Table S10), with the extent of matches between genomes mirroring the results from network analyses (Fig. 3B).

To assess whether the DL-specific HIR were present in haloarchaea from other hypersaline environments, FR was performed independently for each long (>10 kb) DL HIR against 15 saltern metagenomes (11 Chula Bay, 4 Santa Pola; 2.8 million reads, 1.1 Gb) obtained from the Sequence Read Archive (SRA). Recruitment was performed using FR-hit imposing a minimum read coverage of 50% and relaxed minimum identity of 70%. Read coverage across individual HIR was visualised using in-house scripts in R and compared against published gene annotations.

Metagenome sample environments with lower salinity, Chula Bay low (6-8%) and medium (12-14%) salinity ponds, did not recruit any reads. Of 5700 recruited reads, all originated from higher salinity environments (19-37%), Chula Bay high (28-30%) and Santa Pola SS19 (19%) and SS37 ponds (37%), consistent with salinity ranges where haloarchaea begin to dominate the community. Despite low read assignment stringency, coverage across individual HIR was incomplete, with reads mapping primarily within IS associated genes (Fig. S15). Only 1.3% of recruited reads (74 reads) exceeded 95% identity, and none exceeded 99% identity.

To examine the genomic content of HIR (>5 kb) all 654 genes completely contained within them were considered. Assigned to orthologous groups, only 6 (< 1%) genes were identified as core gene content while 180 (27.5%) were considered non-core gene content. By ArCOG assignment 380 (58.1%) were poorly characterised, 177 (27.1%) were information storage and processing, 60 (9.2%) were cellular processes and signaling and 37 (5.7%) were metabolism. Nearly two thirds (63%) of those assigned to cellular processes were associated with V, defense mechanisms.

ArCOGs from [V] assigned to genes from HIR:

- arCOG00719 PIN domain containing protein
- arCOG01208 Minimal nucleotidyltransferase
- arCOG01664 Cytotoxic translational repressor of toxin-antitoxin stability system
- arCOG02777 Restriction endonuclease
- arCOG03779 GTPase subunit of restriction endonuclease
- arCOG03899 Predicted restriction endonuclease, HNH family
- arCOG04493 PIN domain containing protein
- arCOG04793 Transcriptional regulator, predicted component of viral defense system
- arCOG05102 McrBC 5-methylcytosine restriction system component
- arCOG08906 Predicted antitoxins containing the HTH domain

Sequence flanking each region was compared against Refseq\_protein with BLASTX (e-value <  $10^{-5}$ ), where the analysed regions were 2000 bp upstream of the ends of each region. Of the 25 HIR considered (50 flanking regions), 24 (48%) were associated with transposase genes, an additional 11 (22%) associated with integrase, resolvase or endonucleases, 5 hypotheticals and 10 genes of various annotation.

**Insertion sequences.** ISSaga was used to analyse and manually annotate DL haloarchaea genomes for ISs. Of the 489 IS related ORFs found across the four isolates, 297 were putative complete, 108 putative partial and 84 uncategorized. Collectively as a set, ISSaga estimates between 127 to 178 different IS types. Three IS families (ISH3, IS200/IS605 and IS5) comprise 65% of all predictions (Table S5). Considering only predictions with greater than 90% similarity to known ISs, a negative correlation was found between the proportion IS related base pairs and replicon length (Spearman p-value = 0.042).

A bipartite graph of IS to host genome helped to visualise the prevalence of each within the community, where nodes and edge size is relative to the number of ISs found within the target genome (Fig. 3a). The node out-degree profile of IS nodes follows a power-law distribution ( $R^2=0.970$ ) with the top three nodes ISH1a1 (38.4%), ISH1a6 (20.7%) and ISH1a7 (14.6%) possessing 73.7% of all edge weight. Although model fitting to a limited number of nodes is nonsensical, it can be seen that tADL (25.8%), DL31 (31.1%) and *HI* (32.3%) possess roughly equal numbers of the most prevalent ISs, while DL1 possesses fewer (10.7%).

It has been argued that as the set of nonessential genes decreases with genome size, the frequency of highly deleterious transposition targets acts to control IS abundance (6). In light of this, the high density of ISs observed within the secondary replicons of the DL

haloarchaea suggests that these replicons possess a high degree of freedom for genomic plasticity and are likely to contain predominantly nonessential genes. There exist also regions of high IS density within the primary replicons, in particular a 400 kb region within tADL (1.150-1.550 Mb) which itself does not possess a secondary replicon.

Using the ISSaga database a total of 489 matches to ISs were identified across the four genomes, with three families (ISH3, IS200/IS605 and IS5) comprising 65% of all predictions (Table S5). The density of ISs was noticeably higher in secondary replicons and in distinct regions of the tADL and DL1 primary replicons which possessed low CAI/CBI indexes. The secondary replicon with the lowest density was >4 times the density of any primary replicon, and the density in tADL was >2.5 times higher than the next dense primary replicon. A comparison to 119 other species showed tADL is ranked 2<sup>nd</sup> in number of ISs behind *Sulfolobus solfataricus* P2 which has considerably more than any other in the ISSaga database.

**Lake viruses.** Accessions for 55 completed archaeal virus genomes were sourced from the European Nucleotide Archive (ENA) (URL: <http://www.ebi.ac.uk/genomes/archaealvirus.html>) and retrieved from the ENA Sequence Version Archive (URL: [http://www.ebi.ac.uk/cgi-bin/sva/sva.pl?&do\\_batch=1](http://www.ebi.ac.uk/cgi-bin/sva/sva.pl?&do_batch=1)) as DNA fasta sequence. An archaeal virus database was generated from the 55 genomes, where BLASTN identified 15 contigs over 1 kb and 4 contigs over 10 kb with significant similarity (e-values < 10<sup>-5</sup>) to viruses associated with halophilic *Euryarchaeota* hosts (7). Identifications were comprised of *Myoviridae* HF1, HF2 and PhiCh1; pleolipoviruses (8) HGPV1, HRPV2, HRPV3 and HRPV6; and *Siphoviridae* BJ1. In total extent, assembly contigs associated with *Myoviridae* viruses constituted 68 kb with reported genome sizes 75 kb. For *Siphoviridae* BJ1 with a reported genome size of 42 kb, two associated contigs (29 kb, 53 kb) may represent two separate genomic scaffolds.

**Genome characteristics of the four DL haloarchaea.** The genomic features that distinguish tADL from the other three DL haloarchaea and may therefore contribute to its dominance include: 1) a single replicon; 2) a physiology that includes a preference for high-affinity uptake of carbohydrates, complemented by photoheterotrophy and carbon storage. Only tADL possesses genes for gas vesicles, bacteriorhodopsin, and polyhydroxyalkanoate (PHA) biosynthesis, and it has a higher number of predicted ATP-binding cassette transporters for carbohydrates (six), and possesses multiple glycerol kinase orthologs (first step in glycerol breakdown) and a large number of regulatory genes (e.g. signal transduction). Thus, tADL appears to have a highly saccharolytic (carbohydrate degrading) “high energy” metabolism that can respond to changing substrate availability, with glycerol as a preferred substrate. Gas vesicles provide buoyancy that facilitates upward motion, and particularly for slow-growing organisms can allow more efficient vertical migrations than swimming by flagella (9). This may facilitate tADL getting to the surface in the summer, thereby allowing light-driven bacteriorhodopsin to generate energy, and faster growth rates to occur in the warmer water. This reasoning is consistent with tADL abundance being somewhat lower in the deepest point (36 m) of the lake (Fig. S5 and S6). Additionally, surplus carbon and energy could be stored as PHA, and mobilised for biomass production when other limiting substrates become available.

The other genomes each have specific characteristics indicative of niche adaptation. The DL31 genome is characterized by pathways for protein and peptide uptake and breakdown (including many predicted secreted proteases), and is the only one to lack detectable flagella and ammonia transporters. It appears to be orientated towards proteolytic (protein-degrading) metabolism targeting particulate matter rich in protein, with proteins providing both carbon and nitrogen. DL1 is enriched in genes associated with amino acid breakdown, and is the only one to lack genes for glycerol breakdown. It therefore appears to prefer free amino acids, and be unable to benefit from glycerol, which can be an abundant carbohydrate released from algae in hypersaline systems (10). *Hl* has the most versatile metabolism, with genomic potential for utilizing both carbohydrates and proteins as growth substrates. However, it has comparatively few over- or under-represented COGs associated with metabolism, which may indicate that it prefers to target a broad range of substrates rather than having a specialised metabolism.

**Precedent for Antarctic ecosystem distinctiveness.** A precedent for Antarctic ecosystem distinctiveness is known for Ace Lake, a marine-derived, non-hypersaline, meromictic system that is located ~15 km from DL (11). In Ace Lake, green sulfur bacteria grow at the oxycline in the lake, appearing in a distinct, dense zone about 1 m thick. The population is essentially clonal, represented by a single dominant member, *C-Ace* (12,13). The physico-chemical properties at the oxycline differ greatly from the upper oxic and lower anoxic zones, imposing a range of specific selection pressures (*e.g.* light penetration) on the community inhabiting this zone. *C-Ace* is predicted to have evolved dominance through mechanisms allowing phage evasion linked to a growth response controlled by the annual polar light cycle (13). The whole water mass of DL provides different, but similarly constraining conditions, particularly the specific combinations of extreme hypersalinity and cold; conditions that have selected for an overall haloarchaeal community composition that differs greatly from other salterns in the world where *Haloarcula* spp., *Hfx. volcanii*, *Haloquadratum walsbyi* and *Halobacterium salinarum* are typically found (but are absent in DL) (14-16). By restricting the nature of species that can grow and compete in the lake, and providing conditions that naturally promote gene exchange, the system appears to have had the time to enable gene exchange events to become relatively frequent and fixed in the population, becoming an important driver of haloarchaeal community evolution.

**PCR and DNA sequencing confirmation of HIR.** PCR and Sanger sequencing was used to confirm that presence of HIR in each of the four DL haloarchaeal genomes, by amplifying and sequencing the boundary regions of randomly selected HIR from all four strains. DNA was extracted from cultures using the xanthogenate-sodium dodecyl sulfate extraction protocol. Primers were designed to ensure that the desired amplicons would include sequences immediately before and after the boundary of the HIR (Table S11). The following is Sanger DNA sequence data obtained for PCR amplified fragments, noting the organism, replicon and genome location.

DL1

Replicon: HalDL1\_Contig37

Shared region: 20871..25836

CTAAACACACACCTGGGTATCGAAGAACCATCTTTATTTCCGATCAAGGGAGCCCTGACCTCCTCAGTCCA  
AGTGGTCAATCTCCGCAAACAGATACCCCTGAAGAGCGCTGACTGTTTCTTCTGCGACAACCTGAGGCCCCGA  
AGTCACTCCGAAATCCATGCTTGAGTTCGTGCTCTCCAAGATTTCCAGACCACGCTCAAGCTGCTCCCGGA  
GCGCATCGTCTGCTCCCTCTCCGCAGGTGAGGCGTGACAGCGTCAAGGTGATTTCTTCTGCCACTGCTAGGA  
CATCCCGGAGGTCTGTTTACGGCCGCTGTGGAGCTTTGCCGCCACGAGGACTGCCCCATCGATGACTCTGG  
CTGTGGTCTCTACTGTACCTCCGCTCACCTCCTGTTGGTGGCTGTGGTTCGTACAGGTAGTCAAACGACCACT  
GTGCCTCCGTCTGGCGACACCCGAGTCCGTTTACCAGGAGATCGAAGCCGATCGGCTGCTGCGGCGTGAGCC  
GCTTCTCGTACTCGATTACCTCGGTATCGTAAAACCACTCCTTGGCGTGGCTGTCCGTTTCTTGAAGCCCC  
GCTGTTTCGAGGAACCTCGACGAAGTCAGCCTTGGAGTCTGGCGCGACGACAATATCGAGATCCGTGGAGAAGC  
GAGCAATTGAACGCTGAGACAGCGTAGCCGCCAACAGAAGACTACTCGTGACCCCTGTTGGGTGAGCTTTCGA  
GCAGTTTCGATGAGCGGCTCACTTCGATTGTTGAAGCTCATGGCTGTGCCCGTTCCGCTCTCTCGATACTGAC  
GCCGAGGTTCGAGGTCTCGTACATCCGGTTCGAGCATCGCCAGCCCCGACTGAAATTGGGCGTAGTTCTCGCG  
CATATACTCGATTGTCTCTGCTCTCGGGATCACCGGTACCCCTTCGACGTGCTCGATGTGAGTGACGCGCG  
TGGCTCGAGGACGATCTGCAGCGGTCCGTTCAACTCGTCTTGGGGCTGTGCTTCGATGCGGTGGGGAGGTTCG  
ACGACTCGAAATGTCTCCAGGCGTTCGACGTCTGCTCACGACAGCGAGGACATGATAGTTCGTCGCTCGCGAC  
GACTGTAGCCGCTGATCCACACGTAAACGGCGTTCGATCCGCGGTGACGCGACCCGAGTCATGGACTGTGGA  
TGGCTACGTACCTCGATGAGGTGAACTGACCTGCTTGCAGCCAAGTCGACTGATCGTAGGCCTCCACACGTG  
GAGCGCTCTCTAGGTGAGCTACCGATTCC

TCGCGGCCTTGGGAAGAAACCGAAGGAGTTTGGCGCGCAGCCGAGGACGATACCAGCCAATATCTTGTTTG  
AATGGCGACTGAGGAATCGCAATATCCGATTCTCGTCGATACTGACGCCCTGATCGCTGTGCGGAACAGCTC  
ACTATGGGATTGTATTACTGAGAATCGGACTCACGACCACGAACGTCTGCCAGCAGGAGCTAAAGCGCCA  
TTACGAGCAGAACCGCTCTCACGCTCCAGAAGGAAGTCGCTCGTATCGCCTTCACCACGGTAGTACGCGTGT  
TCTTGATGCGCTTGAGGATACAGAGACACCGTTGACACGTGTGCTGAGTGTCCCTCGACCCGATGGGGCTGA  
TGCCGGTGAACAATCGCTGGAACAGCATCTCGTGCAGCATCCAAAGGCGGTTCGATTACGTGGTGTGATGGA  
CGCTCACGGCCGCGTTCGATCCGTTCGAGAGATTACAGAACCGCGACCTCGAGGCGCGTGTAGTGCCACCGAC  
TTTTCTCTTCTACATTCTCTACGATAACGATCTCATCTCGCGAACAGCGTTTTGTGAAACGTGTGTTGAAC  
TCTCAAAGCGAAGGGTGGACAGGCTATCACGCCGTTCGATGCTGCGTGGGAGGGGATTCCAGTCGACTGCTC  
AGACTCATTGACTCGGATCTCCTTCCACCTTCATGATTATAAGGCTCTGTTGAAATCCCATTCTTCAGATA  
GATTCTCACCTGAAACAGCCGGTTCGCTGAAGACTGCGGATTGACTGATTCAAATCGCGGTGGTACTGTTGG  
TTCCGTTGTTCTCGGTGAGCCTGTGGCTTGACATCAGGGCAGTTTGACGGAGAGACTGTAACCTGGTCTCCTA  
ATCGGATTGTTTACGGTGGCGTTCGCTCTTACATCTGGTTTCGATGGGCGTCCCAACGGCCCAGTTGCTGA  
CGGTACCCGCAAGTATTTGGTACATATACACAGTTACAGGCGCATCGGGCCTTCGTTGAAATAAATAACAA  
CGCTCGGCTCTGTTGAAATACTTTTTCTCAGACATATACTTGCCTGAAACGGCTGGTTCGATGGAGACCTGCG  
TATGACCATCAGAATCTACAGCTCAGAGGGATGTTTCGATAACGTGCGAGAATACAGGCGCAAATCGGTTAC  
GACTACTCTAACCATCGAATGTCTGGTGTGCTGATGAATTAACAATACTCCTCAACTCAGGATGAAGAGAC  
GTTACATGAAGTGCTCCGCAACGCGTTTGGCACTCTCTCTATGTAGACG

**Replicon: HalDL1\_Contig37      Shared region: 44074...49706**

TGGGGGGCACGTCCATTTGTATAAGGACCGCGAGAAAGAATGTTCCACGCTGCGTTCGCGTCCCTGTCCGCC  
TGAAACCCACACGAGGGACACGAGTGTTCACGAACCCACAACCGCTTGTCCGTCTTGACGCCGCAAGACGCG  
CACGCTTTTCTGCTGTTCCCTTGGATCGACTTCGGCAAAGTGTGTTCCCTTCGCGTTCGCACTTGTACTCAAGC  
ATTCGAAGGAACGTTCCCCACGCCGCTCCCGCCGATTCCGTGAGTTTCCGGGGAGTTCGACCAACTCCTTC  
GCGTCGAGGCCCTTCGACCGCTACGAGGTTCGATTTCGGTGGCGTAGTAGTTTCGAGAGTTTGTGAAGGAAGTCA  
CGACGCTTTTCGCTTTCGAGATCGGCGTGGCGCTCGGCCACAACCTTGGCGTTGTCTCTCCCAATTTCGCGGAACCG  
CGTTCCCTTCGCGAAAGATCATGCTGTGCGCGTTCCAACCGCTCGCGTTCGTCAGATAAGTCGAGCGATTTCG  
ACGGCGGTGCCGTCTGTGTCATGGGCGTACTTCAAGATGCCAACGTCAATCCCAGACACATCGATCTGGGTTCG  
GTCGGTTTTCTCAGGAGTCTCTTTATCGCCGACGGTGAATGAAGCGAACCAATTCACCGGTTGACTCCTTCTTA  
ATCGTGATTTCTTTGACAGTCTCGGCGTCAGGAATTGCGCGGTGTTTGATGAGGGGAATATCCGCAAGTTTC  
GACAGCGACAGTACGGGTTGGCCGTTCTTACTATCGAACTCGAAGCCAGACTGTATGTAGGTGAAACTACGG  
AAATCCTTGGGGGCCCTTCCAATTGAGACTGCCACGTTGTAGCCGTTCTGCTTCAACTGAGAGAGGGCTTTG  
ATGCTGTCTTCGATACGCATGACAGCAGCTTGTGCGACCGTTGAATAGACATCGTTTCAGCTCATCCCACCAG  
TCTTTGAGGCTGGTGGAGCTGATCGCGTACTTGTGCGCACTCGTTGGTTAAGTGTACCCGCCGATTTGGGAATT  
TGCTTGAATTGTTGAGTGCAGGTGATTGTAGAGTTGCCTACAGGTATCTCGGTGATGATCCAACAGTTTCAG

CTGTTTCAGCGTGGGATCAAGCCGAAATCTGTAGGTGTAGTGCATTGGCTATCGTCGGGAATCAGAACGGTCCG  
GACGAATTTTACGTGAGCTCTCGCCACCGTTTTCGGACCGAGAAACGGTGGTGCGCGATCGGTCCGGCTCC  
ATTCCCTCGATGACTTCTGCCTCAATCATGCCATCATCACTGTTGTTATAACTTATAATCAACCTC

CCTCGCTGGATATAGACGAACAGCGGCATTATGCCCATCGACACCTGCGCGAAGCCGAACCCGGCGGATACCG  
TGAACGGCGGCCGCGGCGAGGATAACGACCCGACAGACAGCCCCGTCGTTACCCAGTCGCTCGTCATCGATCGC  
GCCTCCGTTGCCACGGTAGAGTACGCATCTGGATGAACGATACTCCGGCTGCATCTTTTATTGTAATGCTCA  
ACTCTGAAGCAGTAAGTGAATCATATATTATATTTACTATATAAATAATTATAACCGGATATTCCGAACATT  
CGGTGTCTGTAACGACAGTCACATCACGATGAACGAGCATGAAACGGATATCGGCGAGTGGCGGTCCCTCGG  
CGGCGCCCCGTGTCGGAACGGTAACGATGACGCCGACGCCGCTTTCGCTCACGTCAGCGACCTCCACGGGCA  
GCTGACGCCGCTACCAGGTCTACTACGACAATCCGACGTCGACGCCGGACTTTAATTTCCGAGACGACGA  
TCGCGTCTGTCGAGCGCGGCGGGATCCCCCTGCTCGCAGCGAAACTCGACGAACCTCCGCGAGGACTACGA  
CGTGTGTACGCTCATGAGCGGCGACACGTTCCACGGCTCCGCCGTGACCACCTACACCGATGGGCGAGCGAT  
GCTCGATCCCGTCAACGACCACGTCGCGCCCCGACATCTATGTCCCGGGGAACCTGGGACTACTCGAACGAGGC  
CGCCGAGGACGGCAACTTCGTGGAGTTGATGGACGACCTCGACGCCCCGATTCTCGCGAACAACCTCTACGA  
CTGGGAGACCGACGAGCGACTGTACGACGCGTACCGGATCTCTCGACATCGGCGGACTCTCCGTGGGGTTCG  
TCGGGATGACGAATGTCTACGTCGATCGGATGGCACCCGCGTTCCTCCGAGGGGGAGGTACCGCTTTTCGGTAA  
ACATCCTCACACTTCTTCGAGGAGTCCGCACATGGCCGCCCGGAGGACGGGCGCGGACGTCGTGGTTCGCG  
GTACCGAGATCGGCCTCCCGTGGATGGTCCAAGCCGCCAGGACTGTGCGAGCGTGGACGTGATTGTTTCGTGT  
CGCCACCTCCACGAAGTACCCTACGAATCGAATCGTTCGTCCAG

**Replicon: HalDL1\_Contig37      Shared region: 49699..61930**

GCTTGATCCAGCTCCGGCCGCCATGGCGGCCGCGGGAATTCGATTGTAGAGTTCGCCGAGCGTGATGTCCGC  
GGGTGGGATGGCAGTCCCGTACCGGAACCCGTGCGGAGACGGCGAGGTCCGGTCCCGAAGTGTGCACGGAGTGC  
GTCGTTGAACAGCGCGTTCCACGCGCTCTCAAGGAAGGACTGCCGGTAGAGCGGTTCTTCCGTCCGACCGAC  
GACCGCATCCAGCGGACGGTCGAGCGTGCCAGCCCCCTCGTTCGAATCCCGGATCGGCCTCGAAGAAGGGCGC  
ACGACCGGCTTCGACTGTCTCCGCCGATCCGGCTCCGGCTTCGCGCGTGTGCTCGCCCTCCGTCCGTCAGCA  
GTAGAGGTGGTGCAGGAACCTGTATCTCCCCGTCCCGAACGCGGAGGTCCACACGGCCGATCGCCTCACCCAT  
CCCGGACTCGACGACCACGGTTTTCGGTCTCCTCGACGACGATCGGATCGTAGGTGTAAGTTCGTGGGTGTGCGC  
GCTGAACATCACGTCCACGCTCGCACAGTCTTGGCGGCTTGGACCATCCACGGGAGGCCGATCTCGGTGAC  
CGCGACCACGACGTCGCGCGCGTCTCGCGGGCGGCTGTGCGGACTCCTCGAGGAGTGTGGGGTGTTTACC  
GAAGCGGTACTTCCCCCTCGGAGAACGCGGGTGCATCCGATCGACGTAGACGTTTCGTTCATCCCGACGACCCC  
CCACGGGAGAGTCCGCCGATGTGAGGATCCGGGTACGCGTCGTACAGTTCGCTCGGTCTCCAGTTCGTA  
GAGGTTGATCGCGAGAATCGGGGCGTCAAGGTGTCATCAACTCCACGAAGTTGCCGTCTCGCCGGCCTC  
GTTTCGAGTAGTCCAGTTCCCCCGGCACATAAGATGTCCGGCGCCGACGTGGTTCGTTGACGGGATCGAAGAT  
TCGCTCCGCCCTTCGGTGTAGTGG

**Replicon: HalDL1\_Contig37      Shared region: 70308..74648**

CTGCTCCCGGCCGCCATGGCGGCCGCGGGAATTCGATTGGGACCTCAATCAACCACGTCTGCGAAACAACCTG  
ACGACTCGCCCCACGCCAATACCGTCCGTGGACATCTCACCGACAGTTTGAGCTGGACTCCGTTGAGGCGG  
TTGGGGACACACTCCTGCAACGAGATACTCTTGAGACACTGCCGGATCGGCCGGTGGAGGTTCGTCGCCTACC  
TCCAGTGGATCCTTACTACGGTGACGAGGACGAGAGAGATGCGCTGTACTCCTCGCAGGCTAAACGCGGAA  
CCATGTCCTTTACGCGTATGCGATGCTCTATGCGCTGGTACAATCGTGACTTTTACTGACCTCATCATC  
TAATCGGATGAGTTGCTCTATGGACGGTGTATCCGCGAAGATTTCTGAATGGCATTCCCTGCAATAAGTCGTA  
CTCCTAAGCAACCTATCCACCCATTGCTCTACCTATTCTCTATCAGTCAATAATGTTTTTCGTGGGGATC  
CCCCCTGTCGTCCTCCGGGACCCCGACCCATAACGACTTCCATCAGGGGTGGTAATCGACTGATCCCTCGT  
TACGTTCTCACAACCGATTAGCTAGTGACCTATCATCGGGCTATCACATCGAGAATTTCTTACCCCTCCAG  
TAAAGGTTGAATTTGCGTCTTCGATGCGTGGTCAATTCACGAAATGACACGGACGGTGGATTTCGGCGGTGA  
GGGGTTCGCTGTCCGGCGG

CCTAGTCCAGCTCCGGCCGCCATGGCGGCCGCGGGAATTCGATTCTTGTTCCAGAAGCGTTCGTGGCCTCAAC  
GACTCGCTCTCGGTCCGGGAGAGTCCAGTTGCTCGATATCGATGCTGTTGAGGTTGCTGAGTGCAGGATGCAG  
TCGGTATCCTGGTGTGTCTCGCGGTCCATCATGTACGCCTCCGCCGACTTCTGGCGCAGAAAAACGAAGCA

GGTACGCTGATGTCTCCCGCTGAAGCCCTGCACCAGCCTTAACCAACAGACTTCGTGTAGGCATCCTGTGTT  
GGTTAAGGTGTTGTTCAACCGATTATCCTACTCGGGGTCTGGTCCGTGACGAGGTGACTGACACACCCGGCA  
CTCCCACATTGGCTGGCCAGACCATTTCGTATCTGGGAGCGGCTCGAACTCCTGGAAGTATGTTTCAGTCGT  
TCGACCGCACTTGCAGACATTCAAGACGTGTTTTCGAGGGAGCGTTGGGTTGACGATTCTCGGACTGGTCGTC  
GTCGACGGAACGCTGAAGTGCAATCGCTGGCACTAACCAGACGTGTTAAGTTGCGAATGACACAGAATGTTT  
ACGACCTATTTTCAACAAGAAATCGCTAAGATATGATCCCTCAAACATGAGTACTCATCAATATTTATCTAGT  
ATACCAATCCAAAATAGCCAGTTTAAAGGTACATAGGCTTTGTTGAAATCCTATTGAACTAACACTTTTAGCA  
GTGACACAGCTGCTACGTAGATGTGGGAATTGGCTGTTTCTTGAGCGATTACTCACTTACAACCCGTTTTTT  
ATAGACTAGATATGCTAATGGAAGCATTAGAACATAGATGACGGTAGTCATGGCTAAAAATAGCTCACTAGA  
ATCTACTGCTAAACTGTAGAATAGACCGAGTCCAACGAGACCATATGCTACAGCAAGTGTCCAAATTACTTT  
TGACATACATAATGGGTTAATGCCTGATGAGATAACGATTTGTTGGGACCTTTGCTTCTGTACTGATCTTAGAG  
GGCTCGGTTTCGATTATTGTGGACAGACATCTAGACGATTTACGGAACCTTGTTCACCATTGTTCGGGAGC  
GACGAGCACCCTACTTTTCGTTTGGACGTTGAGTTGACGTTCTTCTGATTGACTTCTTCTGTTTGTGAGAAGAT  
CAGCGTCTAAGCGTGGCGTTTTCCATGCCCTTGTGG

**Replicon: HalDL1\_Contig37      Shared region: 101134..105279**

TAAGTGTCTGCTCCGGCCGCCATGGCGGGCCGCGGAATTTCGATTGTTTTCGCAACCAGATACGCTACCGGTAAC  
ATAAGTAAAAAGATTAGTCCCAACGCGTAATTCAAGATTTGATCTGAGTCTGTTGACACACCATATAGTAAA  
ATGATGAGTACAATCGCATGGAGGGCTGCTAATACCCAGATATACTGATTTTTGTTTCATATTGATGTAGATG  
ACCAGAAATTATATAATTGTTTCGTTAGGTCCACAATCAAGACACTGGCCACAAAAGACCGGGAGAGTAAT  
CCCACAAACACTCGTGAAACAGATAATAAACGCTACTGCGCCCGGGACGCCAAAAGTTAAGAAAGCCAAACA  
TGCTGGACAGGCTCCTCCAATGATTCCGATACACGTAGTACAGGTATTCAAAACAAGACTGTTGTGCTATAGC  
TACTTCTCCAACCTCAATATCATCCGAGCTCGGTTTCGTCGTCTTCGAATAATTCTTGTACTTCGTACTGAAT  
CTCACGATCCTCTAAGAGCACCTCATACTTGGAGATCCAAGTCCGAATCTGGATCCTGTTGAGATGATTG  
TTCTGACGAATCTTCGAAGCCTTTGAAGAGGCGAAATCCGTTTCATTTCTGAGGTTTTGACAATCCTCAAATC  
TTCTGGCTCTGTTGAAACCCCTATTCTTCGTACATATCTTGTCTGAAACGCCCCAGTTAATGAGAGCTGCGT  
ATTTACCAATAAAAAGTCATATAATACCCATAGCGTTTTGTGGGTGTCTGGTGAATTACATGTATGAGTGAA  
GAAGAACTCGATCCGGTCAACAACCTTCGTGGGTCGGGATTTGGACTGGTACTCGGTGGGCTGGCCTTTGGT  
GGGCTGTCTGTTTGGTGTGATGCGGTTGTGAGCGGTATCGTGCTGCTGGGTGCTGGTATCATCGTCATCACT  
AGTGATTCGCGGCCGCTGCAGGTGACATATGGGAGAGCTCCCAACGCGTTGATGCATAGCTGGATATTTT  
TATAGTGTCACTAATAGCTGCGTAATCATGTATAGCTGTTTTCTGGGTGATTGTTATCCGCTCATCACACA  
CATACGAGCCGAAGCTAATGTAGGCTGGGTGCTATGGAGTACTATCAT

**Replicon: HalDL1\_Contig37      Shared region: 102306..105542**

CCGAAGCAGGGGGCTTTCTTACTTTTTGGCGTCCCGGGCGCAGTAGCGTTTTATTATCTGTTTTACGAGTGT  
GTGGGATTACTCTCCCGGTCTTTTGTGGCCAGTGTCTTGATTGTGGGACCTAACCGAACAATTATATAATTT  
CTGGTCATCTACATCAATATGAAACAAAATCAGTATATCTGGGTATTAGCAGCCCTCCATGCGATTGTA  
ATCATTTTACTATATGGTGTGTCAACAAAATCAAATCAAATCTTGAATTACGCGTTGGGACTAATCTTTT  
CTTATGTTACCGGTAGCGTATCTGGTTGCAAAACGAGCTGATGTGTTATGAATGGCCGCGATTCAAATACAA  
CCCTTGATGAGTCAACGCAAATTCAGCGACTTGGCGTCCGGTCCACCGTTGGCGGCCTCATCCTTATTGGT  
TCGTGTGCGTCACTTCATCGTTTAAATGCACCGAGCGTCTGATTGCGCTTGGCGCATTACCTGTCTCGGT  
AATGGATAGTCTCCCGATCGTACACCGTCCGAGTTGGAATCGGTATCCTCGGCATATTCGCGCTTGTGCGAA  
AAATTCGCTCAACCTCCGTTTTATCGGCGGTGACCAATTTGTGGCAGGTGTCTGCTACCTGCTCGGGC  
CACGCTCAACACCGTATAAAAATATCGTATGTGTTTACCCCCAAAATCGCAAGACAGAAAAGGCTTTTGC  
TAGCGCCAGCTTACCAGCTCAACGCGTAACGTACTAACACCAGCGCCGTCTGTGATTTTTGAATTCAC  
CGCCAAACAGGATCACTTATAAATGCTATTTTGGCCCTTATTTTGGGGCTTTTTCAGGGGATTGAAACCTCT  
CTGTGGGGTAAACAGATACAAAAATATCGAAACGACGCCCTCACAATGGTTGCAATCGAAACTCACGACTGAC  
GAACAATACGACTGTCTCGCGTTCGACGACTCTCGCTGTCAATCAGAGGTGTGCTCTACGTGTGCTGCGACC  
GTGCGCAAACGACATGATGCGATGTGACAGTACGAAACAAACAACAA

CCGAGGAGAGAAGTGGTGCCCCGAAAACCCGGAAGTGCCTACTATTCTCGGCTTACGCCGGGTGCCCGACGA  
ATCAGCCTTCTCGCGGGCGTGGCGAAATCGATTGACAACCGCGTTACGAATACATCCAGCTGCCGCCCA  
CTTCGTATCAAGGAAGTCCACGATCGCGACATTTACGCGCCCGAGGTTCCGGCCAAAGTACAGAGATCCTCAA



CGATACTGAGGAAGCCGCAGACTCAGTAGAAGACGAATCCTTCTCACAGGAGGAGATTGTTTCAGACAACGCG  
CCTCGCGCGTGATCACGCCTTCGGACACTTCGACTCTGGTCGGGCGTCAACGCCTCGTACGAGGACACGCA  
ATTTTTCGGTTCGCGTCGCAAAGCGGTCTAGAGTTTTCGAGTTATGGTCATGTAGACTACTCGGCGGTGCTATC  
TCTAACGCTCTCTAAGCTACGTGCACACTTGGTGCACACCATTCTAACGCAGTATTTTTGTTTGTACTAAGTAC  
CGTCGGGACTCTCAGCGGCAAACCTCTAGAGGACTTTGCGACACGACCAAATATTTAGATTTCTACATGTTCCG  
GTAGTTCCAGTACTTCTCAGATCCTGACTTCTCAGATCCTGTGTTATCATTCTATGTTTCATATTCAATCTTG  
GTCTGTTTTATCAGAGTTTGGTTGTTGACTGAGAGATAGTCTGTTCAACTAGTGGTTTCGTCCCAGTTGCCCA  
CTCGCCAGGTTGGTACCCAAACTGACAATGTAATAGAGGAGGGCTTGCCAAAACAAGAAGAGAACGAACCC  
GACGGGAAGAGTGAAAAACACCCTTCAACGTACTCAGAGACCAACGAATGATGATTTGCCACACAACGAG  
TGTCACACATGCGCGAGAGACACACTCTAGCGCA

**Replicon: HalDL1\_Contig38      Shared region: 453313..459149**

TACTGTGCTGCTCCGGCCGCCATGGCGGCCGCGGAATTCGATTCTGATGGTGAAGATGCTGACCGAGTACG  
ACATTGGCTCACTCGACGTGCTCATCGGGAACGCCGAAGACTACGCCGACCAGGTGAACGAAGTCTCGACGG  
CGAGGTGCTCGTCCGACTGCGACAAGACGATCGACTCACGATTGATTGAAGAACCAGGAAACCGTCCACT  
CGAAGATTTACCGGATCGTGATGCCGGACGACACGGTGAAGCTCGTCCAAGGGTCAGCGAACCTCTCACGGA  
ACTCTTGGGAGTACCACACGAACCAGATCTCCGTCATTACGACCGATGTCGGGACCGAACTGGACGAGGAGT  
TCGAGCGGTTTCATCGACGAGTACCGCGACGGGTACAGCGACCAGACGCTCCTCGAAGGGCTTGTCGAGGCAC  
TGGAGGATGCCGATTACCCGGAAGAACGGGAGAACCGCATCGAGTACTGGGTTGGTGCCGGCGATCTCGACG  
TGAGCGATACTGCTGCTCTGAATCAGGACGCCGTTGAGGACCTGAAAGACGTCGCCGATCAGGTCCTGCCG  
TTGTCGACGACCCGGAGGGGGCCGACGAGACGGTTACGTTTCGTGGAAGAACCTGAGAACGCCGATCGCAACG  
TCATTGAGCCGGATGAGCCCGCGGACGAGGAAAACCTCCACCGACGCTGCGAACGACGACGAGTACCCGGACG  
TCGGGCTCGTTCGAGTCGGATCACGAAACGGGGCTGACGGACGGGCTAGATCGTCCGCGGGTCCGTGCACCCG  
ACGAGAAGATACGGATGGGAACCAGCAAGGTGGACAAAGACACCCGCCGACGAGTTTGGGGCCGGGCTCCGTG  
ACCGCGGCGCGACCGTTCGAGGATCACAGCATCACCGCGCCGCTGAGCGCGTACAACAACCAGGTCAAGGAAT  
CAACAGCCATCCCAACGATGTCCGTCTTCCGGAAGCCGAGCAGGTCGTGATCGGTGAGGACGACGAGATGA  
TTCTCGTCGCCACCAACGAGCCGACCCCTGAAGTTCTGGATCACTGCTCGAAACTATCGAAGACTACATCGA  
GTCTGTCAGACACGGCACACGCAATCCGAGATCGCAGTATGGCGCAGATGTACGAGGCATTTCTCTTACGG  
GTCTG

GGGGAAGGCTCTTCCCCATATGGTTCGACCTGCAGGCGGCCGGAATTCAGTATGATTGCAAGCCCCGACTA  
AGACAGTTCATAACCAAGGCAGACGGTGCATATAGACTATCCGAATATTACAAGATGTTATCAACGACTTCGC  
GTAGGTTCATCTGGGCTGGATCAAGCGAAGCATCAGTTCGTGGATCTTGAACAGACGGTATTGTTTTATTTCC  
GCGGCAACACGTACGATTTAACGAAATTGTCCGACTAGCGTATCGCTACCAATTGACCGAGCAACCGCTGGG  
TCTCGTGAATACTCTGCAAAAGTTGGACGGGGAATCGAGGAGATTAGTCCCCGAACAGTCGAGAAAAGAAT  
CCGCCGGAGTTGTCCGTATCCGATACGTTTTCTGTGCTTGTGACTGCACGGTATCCGTGCCGGTTTTCGGCC  
GCTCCGTTTCAGGAGCTCGTTGACGGAGTATCCGATCCACTCGGCGAATTCCTCGGGTGCACCGATGTAGACG  
CTTGTGGATGATTTTTCGGACATGAATCGTTTTGGGGAGGCGCTTCTCGTAGTCGTAGACCTCGTACTCGTTCG  
CGGTGCAAGTCCGGCGGTGATTGCATTCCGGCTCAGATTGCAACGTGACACGGCCGCCTTGATATCCCGCTGC  
CACTTCAACCGTCTGTGTCGTACGTCTTCTCGGCTGGTTTCGTGACGCGGGAAGTACTCGGGTTGCTTTTCA  
TCGGCTTCGTGCTAGAACTCGCGGACAATACGGCGGACGCTTTCGATAGTCCCCTTCCCCTCGGTCCATGGT  
TGTTCCGGTGAGCATTCCGGCGGGTACGTAACGAAACCGGGTTTTGTGCTTCCAGAACCCTCTGAGAGGTCT  
TTTTGTGCTTCCGCGAAGCCCGGGTCTTCCGGGTTGGAGGGGAAGGAGACGTCATGCTCAGATTTTCATTC  
GGTTCCGGAACCTCGGATTTCCGGAGCGCGTCTTGGTTCGTGAGATGAGCACGGCTGATCGACGCTGGTGGT  
GTCCAGTCGCCCCAGTAGTTTC

***H. lacusprofundi***

**Replicon: H.lac NC\_012028      Shared region: 7615..29467**

GACCCCGGGGAGGGGGGGGGTGTAGTAATTGAGCGGAGGAGGGACGGTCGAGGCACTTCAAGCGTACAT  
CGACGCATCCCCGTGTCTCAGTCTCTGATGAGTACGGTCGTGAGCCCTTGCTCACGACCCGCAACGGAAGAG  
TTGCCAGATCAACGATCCGGAAGTCAGTCTATCGGTGGAGTTGCCACAGGCGCTCGGAGATGAGTGCATC

ACGATGATTTCGATGACATCGTCTGACGCGTGGCGATGTGCAAACAACGCCTGTCCGCACATGGTTCGCTCGG  
GTGTGATCACGTATCTCCTCCGAGAAGACGTCCCAATCGACTACGTCTCCGATCGTTGTGATGTCAGTCCAT  
CCGTGATTTCGGACGCACTACGATGGCCGTGGTGAGTCCGAACGCATGGAAGCCCGAAGTCAGGCAATTGCAG  
AGCAGCTCGCTAACTAACCTCGGTTTTCGAATTCATAGACATGACAGAGTTCATGACGCAGATAGCATCGG  
CACCGATAGTGATACGCATATCCTCCCGTCCGACCCAGATATCCACTCCCATGAGCATCAGGAGGTGGATCG  
ACGACAACCTCCTATGCATCGATGGCCTGACGGCGTACGAAGTCTTCTTAGAATGCCAATCAGAGGATTGCTC  
CGAAGAGGCGAGTCTCATCCTCGCAGAAGGGGACTTCCCAGATTACCCGGAAGAAGTAGATGACCTGATGTA  
CGACGTGTATCAATGGTTCGCAAGAACGCTGCAACTCTAGTACCGTATAAGATGGATGCTTCGCTGTATAT  
CGCAACCCACGTCCTGATCGCTGGTGAGGAAGATAGTCGCAGTCTGTTACGATCACGGATCGCCCTGTTCT  
TGCTGCCGATGAAGGATATCAGGACGGGGATCACAGTCGCCTCCCGAAAAAGACGGGGAGCTCCTACTATAC  
TGTGAAACAACAACACGGGACGCAATCCAGCTCGTGGGGATCGGGTCAGATCCAGCTCAATCAGCTCTA  
CCGAGAGATGGGGGAATAAATCATATTTAGCTACGTTCTGTCGACAGGCTCAGTCAAACCTCGGTCCGAGGG  
TCGCCAGACAGGGGCGGTGGAGCTTTCTCATGACTCAGTCAGACGAAACCGAAGGATATCGGATAAACAG  
CTCAATTCGAGAATGCCTTGTACGCTTCGATCTTTTGGCCCATCGGAATCCCCTCTTCACAGGGGGG

GGGGGGGACGGTGGGTTTTGCGAGACGACCGGTGAGGTAGTGCGGGAGCTCAGAAGCAGTCCGCTCTTTGGT  
TCCACGTGCAGCTTACTAAGTGAGAAGCCAGGATTGATTGAGGACGAGGGTTTTATAACTGGTAGGTTCCCTTT  
GAGCAATCAAGCGACGCCGAGAATCACCCCGCATCTACAAGCTGACGATGCATAGACCCTCTCTGGCAAAA  
TAATTCGATAACCGCAATCCCTGGTATCATAGATCCTTGCTGACGCGAGGCCAGCGCGTCTCGGACGTCGCG  
TGCTAGCGGTACGATCAGCAAATAGCACGTGATACCAATGACGTCAGAAATCCCGCCAGAATACGACGATAG  
CACAGTTCGGCATTATCGCGCCGACGGTGTCTCACCGTCACGCATGACGACGAAACAACGAGCATGTCAT  
CAAATCCCGCGCCGTGATCAGGGTGACAAGTGACGCGTCCGCTCCCGCAACCCGACTACCGTGGACGT  
AAGCGAGGCCCTATGGAGCATCCCGGACAACCTGGACGAAAGTGTACAGGCTCACAGCTGAGTACGGCCATGA  
TAAAGGTATATAACCGTATCCCGAGTCCGGCGACGCGGTCTCGTGTGCTATGTACAAAAACAGCCACAT  
CACTGACGCGAATCACACTGTGCAAGCGGTCCGGGAGTATAGCCTGGGATGCTCGTGCAGAAGTTGACGAAGA  
GGCGCTTGACGATGCTTTCAGCCATCTCAACGGCTGCGCCGATGAGTTCCCGACGGCGTCCGTGAAGTCTT  
CCAGTACATCCGTGACAACCCGCGAGAAGCCGTTGCGGACGCTGAAAAGGACGCTGAAATGCACGCGGTAGA  
CTGCGTGACGGATTTGGAGACGATCCCGGTATCCGAGTTTGACGCATTCCGGGTTACCTCCGGTCCGAGGG  
GGGGAGTCGTGAGTCCACAGAGTACTCATCTGATAGTGAGGTTATGGAGGCCGTCGCGCAACTCCAGC  
GAGTCAACGTGCTTCCGCCCTCCCGCTTGTCTCGGTGACAGTCCGTAGACGCGATCGCGTTTATGAGTACCT  
CCGCCACGAGGGTTCGAGTGATACGCGCACTAAATCTGACCACGACTACCCGAGTACCGGTAACCTGCCAGC  
TCGAACTCTTAATCAGTCTGTTTCGACCTTGAACGTGTAAGACTGCCGCAATCGAGTTGATCGAGCAAT

**Replicon: H.lac NC\_012028      shared region: 54359..60782**

CTAGGCAATTTTTCGTCGGCCCCCTCCGGGTGCTCGACAACGGCAGTGACCTGATCGGCGACGTCTTTCAGGT  
CCTCAACGGCGTCTGATTGAGAGCAGCAGTATCGCTCACGTGAGATCGCCGGCACCAACCCAGTACTCGA  
TGCGGTTCTCCCGTTCTTCCGGTGAATCGGCATCCTCCAGTGCCTCGACAAGCCCTTCGAGGAGCGTCTGGT  
CGCTGTACCCGTGCGGGTACTCGTCGATGAACCGCTCGAACTCCTCGTCCAGTTCGGTCCCAGCATCGGTG  
TAATGACGGAGATCTGGTTCGTGTGGTACTCCCAAGAGTTCGGTGAGAGGTTTCGCTGACCCTTGGACGAGCT  
TCACCGTGTGTCGCGGCATCACGATCCGGTAAATCTTCGAGTGGACGGTCTTCCGGTCTTCAATCGAATCG  
TGAGTCGATCGTCTTGTGCGAGTCGGACGAGCGACCTCGCCGTGAGACTTCGTTACCTGGTCCGGCTAGT  
CTTCGGCGTTCCCGATGAGCACGTGAGTGGCCAATGTGCTACTCGGTGAGCATCTTACCATCAGGTCCG  
GCGTCTCCGCGTACGTACGGCATCCACGTGACGAGCGCCTGCGAACAGATCAAGAAAGTCACTCCGCTCTT  
TCACCATCGCCAGGCGGTATTCCGCCGCACCGGATCCGTAGAATTCCGGCATATCCGCAACCTGTCAAACG  
AGATATTCGCCGTGAGTTCGTCCATACACACGGTAGCAGTCTGAAACGAATAAAACCGTCCCGTGGAGTGAT  
AGTGGAGCATTGTCATCGTAACTTCGACGCCGACGCACGCCTCATCGGGCTGGAAGCCGGCCAGTGATTGA  
GGAATGGCGCAAGCTTCCGATGAGCGGACGTAAGCCGACGCGATCTGAAGGGGCTGATTTCCGGTGGGG  
TGATTCGACAGGGGTGCAGGACCTGAACTGATCGTGTGATGTCATCAATTTACTTTACCCTCAAAATATG  
CTGGTAGTGGGGCTAATACATCTGATATTGCGGACACCCCGTGTCTCAGTACAAGTCGATACGGAATCGT  
CGACTGCGAAAGCACCCAGCGAAAACCTCCGCTGCGGATCCATCGACTAGGAGACGAGTATCGAGTGAGTCTG  
CATCGCGCTGTTGTGATCTCTCTTAAATCATAACCAGGT

AAATTCAGGAGCCGGAAGGAATTCCTGGTGAGGTAAGATTCTGTCCCGCGCACAGGTTGCTAGAGCCGGTCA  
GGTAGTGACCCTGTTGCGCGGAGCTAAGGGCTCGCAGGCATTTGAACTGTGAGTATAATGCCGCTCCAGC  
ATTGAACCAGGGGTTCAAATGCCTCTGGTTGTTTCATTTAGTTATGACAAGCTTGCCGCCTAAGGTGCAAGC

CCTCCACAACCGGATTAATAAATCAGAAGTACTGCCACAAGATGACAAAGATGCGCTGTTGCAGTTCTCGGA  
CGAACTCGGTGCTCATAACTATTCAACGGGCAGGCGGGTGAACCTCTACAGCACTGCACGATGATGGCAGG  
GGATTTCGGAGAAATACAGCCCGGATCAACTTCCCGAGCCAGATCTCGTCGATATGATCGGTGACACGGGAGAC  
GGAGAAAAAGAAGGCGAAACGGTACGTACGCTGGATCAACGGAACTACGATAGCGAGGAATCAAAACGGGA  
TCACCGAGTCGCACTCCGGATGTTTCGGGGGGCACATTACTCGCGGGGATCCTGAAGACGAGAAACCATAACAG  
TGTCGAATGGATCTCGGCCGATCTCCCGGATGACTATGATCCAATTCCAGACAAGACGAAAATGTGGTGGTG  
GGATGAACACATTCTCCCGGTCTGAATAACGCGAAGTATGCCAGAAACAAGGCGGCGGTTCGACAGTTGATTG  
GGACTCTGGAACCTCGCTCGGGTGAATTCGGTTCGATGAAAGTTGGTGACGTCCGGGACCACAAATACGGGAA  
AGAAATCACAGTCAACGGTCCGGCAGGGGCAACGGTTCAGTCAACCTTATCACATCCGTTCCGTACCTCCAACG  
CTGGTTAGAGGTTACCCAAAAGGAGATGATCCAGAAGCGCCGCTCTGGTTCGACCTGGATACCGGGACGCG  
AGGTGAGTTACAAGATGAAGCAGAAAAATGCTCCGAAAGCCTGTTGAGCGAGCAGTAGACATCGGGGAGGCC  
CCGCCACACACCACCCCC

**DL31**

**Replicon: DL31\_Contig114      Shared region: 59595..76202**

GTGTTTTCCCTGCTCCGGCCGCCATGGCGGCCGCGGAATTCGATTGGCTGGGCTGGAACGAGACCACCGTC  
CCTCGACGGATCGTTTCGCGACGAGATCATCACCCAGCTCACGCGGTTCGCCCTCGACGACGGCGGAACGATCA  
GGTGAGGGGAGCAACCAGCGAGCCAGACACCTTCGTTCGTAAGCCAGTTTCGAGAGCTCCGAACCGCCGTAAGGG  
CTAGACTTAACCAACACCTCGGACCCGTACCGACACAGTGTGGTTAACGTTGAAGGTGGGTACACTCCCTC  
GTCCCCGCCCCGCCCTGATACTCGAGTGAATACTGGCGGCCGCGTTCGACTCGAATGGCCGTTCGCGAC  
GGGTTTTATCGGGCCGCTGTTTCGTCGAGAGCGAGTATGGTTCGTCGTTGAGGAGGTACCAAACCTAAGCGAGC  
GCCGCACCCAAACCTCGTCCGAGACATTCGGATGAGTTCGCTGGCGTTCGATTTCAGACGGCCGTTCGAGGCCG  
TCCCAGCAAGCGTTTTTCGACGGATCGACGAAACACACGGAGTTCGGCGGGTTCGATGCCCGCATCGCCGACG  
ACCTCTCGCAGTACGAGTACGAAGGGGACGCCGCTGGTGGCTTCAACCCGAACTGTAAGCTCTGGTTCGCATC  
AGGGGTTCAACTACAGCGTCGACCTCTACGACGCCGACGCCCGCATCGAGTTCGAGAAGAGCGGAGC  
GAAAGAACGTTCAGCGACGACCTCTCAAGTTCCAGAAGGGATACCGCACCCAGAAGGACAGCCCGCCGAAAA  
TCGAATTACGCTGTCTGGTGGTGCCGGTGAATATCTTGGCCGGCATAACCTCTACCAGCACAGTCTGACGA  
AGCTCGACTTCATGAAGGGCGTCTGTTTCATCGACGACGTTCGCCGTTCATCGGCTATCGCGACCCGCGACCGG  
ACTGACGCTTCTCGCGCAGACTGTTTGTTCGGCGCCGAGGCGTGCAGCGCGCGACAGCGTTCGCGCGCGTGC  
CCATTATGGCTGGTCCAGATCCGCACGACGACACGAGTAGCGACCACGACAGTTTCGAGAGGACAGCTCGCAC  
AGGACCGCGACGCCCGCAGGCGTTCGACACGGCGGA

CCGGCCGCCATGGCGGCCGCGGAATTCGATTGAGGAGGCTATAAATGGTAGAATCGGGATCAAGGCGGCGC  
TCGACGCGATCCTTTATCGTGGCGACCGAATCGGACCCCTCTGCCGAGTCATTAATAAATCTGGTATGTGTTT  
ACCCCGAGGACTCGACGGATGGCACAGCGTGAGTCCGTGAAATCATCTCGTTGTCTCGGACAATGCGCTTGA  
GCTTCTCGTAGGGATTGCGTCCCTGCTGGCGCGATGTTCGCCAGCAGGGACAGCAACGTCTCGTGAACGAACA  
TCCCGCGGTTCGTTGCGGAGCGTCCCGATGATTTCCGGAGAACAACCGGCTCACGAAGCGCATTCTCCGCGAG  
CGTTGTTTCGTTGGCGGACTGCTGGCTCACCGATGAAGGTGAGCCAGTGGTTCGATCCCTCCTTTGATCTTCC  
CGAGCAGTGTGGCACTGGGTTCGTCGGTAGCTGAGCACCTAACGAGCGATTTGAGTCCGTTCTGGCTTGATC  
GGTGCATCTGTGCTCGCTCACGAAGCTCCGGGGTTCGGTCTCCAGCCACGACTGGAGACCGACGTACATTTGC  
GTGAGATGCCGGTGAATTGGCTCTCCGTCTCGTACTTGTTCAGCGACATCTTCCGCTTCGCGGAGAATATGT  
GCCCAGCACCGCTGGAGGTTGCTGGTGAATGCCGGATATGCCGTCCAGCCATCGCAGACGGCCGTTCCCGCG  
AAGTCTTCGCGAGGACTTCTGCCGGAACATCGCTTCCGCGACTCTCTGACCCGCTACAGCGTGTGCTCG  
TCCGTGGTGAACGTCCACATCCACGCTGTTTCGCCGTTCGCGTTTGAATCCCGTCTCGTCGATGTGAACAACG  
TCAGCGTGTGAATCCGTTCGGCGGATCTGTTTCGTAATTCAGCGACCGGCGCGCGCAGCGCGCTCGGTTCGCG  
TGCCACGCGAGATGCACCTGAGAGTTTCGAGGCCATGCAATTGCTCGAAGCGGTTCGGCGATCTTCCGGTAGGGG  
AGCGGTGATCGTATCTGGAAGAGCGGCTTGGGCGATGACGTTTACCCCGAACTGCCCTCGTCCGGGCGAGGT  
CCGGGGTGTGAAGCGGACAGTCTTCGCTCCACCCAGAGATA

AAAATCAATTCTTTCACGCGTTGGGAGCTCTCCCATATGGTTCGACCTGCAGGCGGCCGGAATTCAGTGTGA  
TTGGACTACGGTGGCAATCTCTATCTAATGGGCGCGCGTTCACCTGTGGGTTCGATGATCCGAATGTACAGGAT  
AGCTGCTCTACCCAAGATCCAACAGGTGAAAACGCCTATCAAAGTGACGACTACTACGGACACGTAACACAC  
CACTTCCAGGACTACGACGCCGCTCTCACAAATATTGAGGCTGATGATCAGGAAGGACAACCGCAGCGCGAT

GGTTTTACTGACACGATTGTGCGACGAAAACGGCTATATCGAGGGATATGTGGATAGTAACGGTATTGACGAT  
ATGATGGCGAATAATCTCGAAGTCCGTAAGCGCGGCATCACTACCGGTCCAACCACGGGCGTAATCGAAGAA  
TACTTGGACAATTACTGCAGCACGAGCGTCACGAGACGCAGTCTTCTGCATGTATCCAACGAGCAACAATCC  
GGAGATTCTGGTGGGCCAGTGTACGACCGTGACTACTTTGAAGGAAATTACTACCTCTTCATGGTTTTCTCTC  
GCCACCAAGCAACGGGAGCCTCAGAGGCTGTGCGCTCAACAGCCATTCAATGGCAAACAACCTTGGGATT  
CAGTGGAGGACTCGGTAGTTAATCCGGAAGGGTGGTTAAGTACCACCCTCCAAGAGTGAGTAATATGACAAA  
GATCCCGCAAGCAGGAATGCGATCTCGGGGAGTGCAGAGAACTGAACAAGATTTTTCATAACCAAGACAGG  
ATTTGAGGGATCCGTATCCGTATCAACGATTGTTTTCTGGCCTAAGGTTACTAAGTACCCAACCAAGAGGAA  
ACTCGCAATACCAAGGATGCCAGTGATTCCAAGTGATTGTTTGAGAATCTTGCGCAGAGACCGCTTCTCGTT  
CGAATTGCCGGCAAATAATAATCGAACTACTAGTCGTGCGTACACATTCAATTCACGCCCTCTATCTGAA  
TACCAGATATCAATAATTTCTATGAGTCCAGCCTCCTCAAGCTTATCAAGGTGATAACTTTGCGTTTTGGAC  
CGACATTATCGAAGTGATTCTGCGGATTATCGCTTCGCCGGTCTCGGCGGTTCTCTCT

**Replicon: DL31\_Contig114      Shared region: 111139..146012**

CCGGGTCTTTCTGTGATGGCTCATCTTGACTATTGGTGGGTCTGTCATCTCCCCGAGCCTGTCATAATCA  
AATGTATTCCTTCAAGCTTACATTGCAACTCCACTGTTTTTTTACACACAAGGCGTTTTGTGCGGT  
GGTACGATAGCGGGCCGTTGATATCGGACGGATGACGATGCGGTGCTCAGCCGTCTTAAACACCGTAACA  
CGTGGGACAACGCAGGCCATCACGTGTGGGAGCAGAGCCGGGAAGGCCAGAACGCAGGCAACGGGAGCGCGA  
TGCGGTGTCCACCGCTCGCCATCCCGTACGCGACGGACTGGGACCGACTCGTCGAGGTAAGTGGCGAGTCTCT  
CACAGATCACGCACGCTGACCCACGATGTAAGTGTGCGATCCTGAATCTCACAGTGGCTGGCCTCC  
TTGAATATTTGGACACGCCGTTGAGGACGCTCTTGACTACGTCGGTGCGGACCCGCCTGAGGAGCTCGTGA  
TGTCACTCCAACCGCTCGCTCGTGGCGACGCACCTGGAACGCTGGAAACGTCAGGGTACGTCGTGCATACAC  
TGCATACGGCACTCCACGATGGCCTCATCGCGGACAGTGCCGAGGACGCTATTGTGACGGCTGGTGAATCGT  
GGCGGTGATACGGATACGATTGGCGCGATTACTTGGCGCAGTCGCTGGCGCGCGGGTTCCGGAGCGTCACATC  
TTCCCGGATCGATGGTTGGGTGCTATCGTCGATGTC

**Replicon: DL31\_Contig114      Shared region: 664513..683577**

TAAACAATTCATCCACGCGTTGGGAGCTCTCCCATATGGTGCACCTGCAGGCGGCCGGAATTCAGTGTGA  
TTGTATGATGGATCGTTGACCTCGGTAAACTGGTGATCTGGGACAACGTTGAGTGTGCAATCTATATACTCG  
TCTTCGAGGCCGTACATACGAAGATGGCTCTGTTGAAATCCTCAGAGATGTACATGTTTCGCCGTGTAATTCT  
ATGGGATGAAGTCCCTCCCAAAGTCGCAGATTCTCCGTTTTACTGAGAAGGCGATCCATCTGGCACGCCGGG  
CGGTCTCTCGGTACTCTCGAAATTTCTTAAACACCGCTATACACTTCCGCAGCACGTTGTTCTGCTCTGTC  
TCAAAGTTCCGAAGAACACGACCTACCGTGGTCTGCTTGACGAAGTATCGAGATGCCACGCATCCGTGCTG  
TTCTCGGGCTAGCCGAATTTCTACTGCTTCAACGCTTTGTAAGTCGTTTCCAGCCGGCTTGATATGGCTGTAT  
GGCGTGTATATTGACTCTCTCAGCGACACTACTTCCGACAAGCGGCGTTGTTGGTGTGATGCGTCAGGGT  
TCGACCGCAGTCACGCTTCCGAAACACTACGAAACGCGCTGAACTCACGATTACGAGCTCAAGGTGACGT  
TACTGGTTCGATGCGAAGGTAACGCGATACTCGATCTACACGTAACACGACCGGAAACACGATAGCCAGA  
TCGCTCCGTCGTTGATCAAGCGCAATCCCGACGATATTGACGTTTTGCTCGGTGACAAAGGGTACGACGATT  
CAGAAGATCAGGCGGCTCGCCCCGGCAACACGAAATTCGACCCTGATCAAGCATCGTGAGTTCACGTCCT  
CCATAAAGGCTTGAACGTAACGGCTTAGACCTGATCCTCTACCGTCAGCGGAGTCCATCCGAAAACCTGGTCA  
ACTCAACACTCAAGCGGAAAGTACGGGGTGTGTTTGTCCGGTTCAGGGCGCTGGTGAACCGTTTTCTGGAAC  
CAACTCTGA

TTAATTTTTCCACGCGTTGGGAGCTCTCCCATATGGTGCACCTGCAGGCGGCCGGAATTCAGTGTGATTC  
GATACTAATGTCCTCACTCAACTGGGCTGTTGACAGCTCATCTTTGTCGATCGACGGTGAGAGCCGATGAGC  
AATGAGAGCAGTCGGGTTCAAAGTGGGCTGACAAAGCAAGTTGATGATGTCCTTACTGCAGATACTGACTGG  
ATCACACTTGCGAACGAAGTGGACGTGAGCCGCTATACGCTACGGGACGCACACCCAGAGTGGAGTTCGTGCG  
CTTCCGTTTTCGGCCAATGTTTTCTGGCGTATCTGTGGGCAACTGTGAGCGTGAATCTCTGTGAGGAATCCCA  
GAACGCCTCTCTGACCGACCGGAACCTCGCCCGTGCATTTGGGTTTTGAGATGGATGATCTCCCTCAGGAAGT  
AGCTGTAAACCAGTCCGGCTTGAAGCCGATTACAGAAAGTTACAGACGGTCTGCGAATCAGGTGCTGAAGAG  
ATCCGCTGCTCGCGGCTGAACGAGGCGACCAATCGGGAATGATCTTCTCAAACAGCGGACGACGAAGAC  
AAACAGTCGCTGTCAAATCGAACCCTCAACGCTTGTACGGAAGAAGGGGCATCAGGTGCTTGATGAGTTG  
AAGTCGGTAGCCATCCCTTCAATCTCACTCTCTCGCCCGGATGACGCGATCTACGACGACGATGAGTTACTC

GTCTTAGAAGCAATCGCGTCGATCAAACAGAAGGCAGCACACGATTCCGGGCCAGAAGCTGGGTGACATGAAA  
AATCCAGACCCAGATATTGATGACCCGTTCTACGAGGACGGCCCATCTGGTGAGACGCTGTTGGAAGCCCTC  
AAGCAGATGTCTATCGAGGAGATTGCGACTGTACTGAATTTTCGCTCTCCGGAAAACCTACACACGCGCGAAA  
CCCCGAATCAGGAGCTCGAACACGGGAACGGCTCACGGTTTTGGGACTCGTGCGAAAAGTCGCTCTGGATATGA  
CGTACGTTGCCTACTATGGCGATCGCGACGAGATGGAATGGTACAGGGCGCCACCTGACGAAAAGAGTACAG  
TTGGTGTCAAAAGTTTTCGACGGTTCGTGATCGTTCGGCGAGAACACCCACTA

TAACATTATCACGCGTTGGGAGCTCTCCCATATGGTCGACCTGCAGGCGGCCGGAATTCCTAGTATTGG  
TAGTGCTACGCTAAAACAGTGCCTCAACAGTCGGCAACGAGATGTTCCCTCGAGGTCGCGCGTCCAGTACGTC  
GCGAGGCCACCAGGGCTACACCGCTCGCACAGTGCATGAGGCTTCGAGATGACCGAGTTCGACGCGGAAG  
CGCTCAGCGCCGCGAGGGCGTCGACGACGAGCCACAGCCGTCGAGGCGTAGTGATTGCGTTTCGTCGGGA  
TCCAGTTCCGTCGTGATCGCACAGTGCACACAGATGGGGTGAGTGACCCGCTCGTCTTCGCCCCAGGTATGC  
GCCTCGCCACTCTCGGTACCGGGCGGGCGTACAGAACGCACACCCTGTGAGCGTCTGCTGCATCACTCGC  
CCTCCACGTCGGCGTCGCGACCGGCTGTCCAGCCACGGTGGAAGACGGCCAACCTGCCTCGCCGAGTCGAAGC  
TAGTGCCACTCGGCTCGTGAACGAGGACGCGATCCTCGGGAACGGGTGTGACGACGTCGCGCTCGATGAGTT  
CGCTGACCAAGTTCTCGACCGTTGCGTCGTCGACGTCGCGCGTGTGACGCTGGCGGGCGTCGCGGTCCTGTG  
CGAGCTGTTCCCTTCTCGAACTGTTTCGTGGTTCGCTACTCGTGTGTCGTGCGGATCTGGACCAGCCATAATGG  
GTCACGCCGCGCACGCTGTGCGCGCTGCACGCCTCCCGGCGCCGACAAACAGTCTGCGCGAGAAGCGTCAG  
TCCGGTTCGCGGGTCGCGATAGCCGATGACGGCGACGTCGTGATGAACAGGACGCCCTTCATGAAGTCGAGC  
TTCGTGACTGTGCTGGTAGAGTTATGCCGGCCAAGATAGTTTACCAGGACACCAGACAGCCTAATTCG  
ATTTTCGGGCGGCTGTCTTCTGGGTGCGGTATCCCTTCTGGAACCTTGAGGAGGTCGTGCTGACGTTCTTT  
CGCTCGCTCTTCTCGACTCGATGGCGATGCGGGCGTCGCGTCGTAGAAGGTCGACGCTGTAGTTGAACCTG  
ATGGCGACAGGAGCTTACAGTTTCGGGTTTTGAAGCCACCAGCGGGCGTTTTCT

**tADL**

**Replicon: True-ADL                      Shared region: 1940216..1952775**

CGCCTCGATGTCTGCGAAGAGCGTACGTAAGTTCGTCGTTGGTGAGAATGTGCGGGCGATGCGACTGGA  
ACCGATTCCGCACTGTGCCATAGGTACATTCCCCTTCGTCGTTGCTCGCGGGCGGTTTCGGTGACCCCGCACC  
CCTCTCAGGGGTTCAACGAACAGGACGGCGTACCGTTTCGGCAACGTATTTGACAGTTGCAACGTACTGTCCA  
TATATGTCGGGATGGCTGTACTGAACTCTCGAACATCGGCAGTTCGAGGACGTTGGTAGAGGACGTCCTCCG  
CAACCTCGGCTACGAGAACGTCCGCCAGGCCGACCGCACGGCTGACGAGGGTCGCGACGTCATCATGGAGGA  
GGTCGTGACGGCACGCGGCGTGCATCATCGTTCGAGTGCAAGCACACGGGGACTGTCCGGCGGCCGGTTCGT  
CCAGAAGCTCCACTCGGCGATCGCGACGTTTCGACTTCGACGGTCCCAAACCGGAATGGTTCGTCACGACCG  
CCGTTTTACGAACCCTGCTCAGGAGTACGCAAACCGCCTCCAGCAAACGACGACA

CGGGTTTTGAGGATGGAGCCAGCACGTCGAGAAAACGGTCGACATGAACTCGGACTTCAAAAAATCGATAATT  
GTCTGCAGCTGCGTTGCTCGGACCGCAACCTACTCCCAGGACTCCGGATGACTCTTCTAGGCGGGTGAATAG  
TAACTGCTGTCTCGACGTCGCTCTTTCTGTTCAAACCTTCTTTTGAACCTGTTGAATTTGACGCCG  
ACTCCCTTCGACCGATGAGTGACGATTCGAACACGATCCCTGCTAGGAGTGGCTCGAGCTTTCCCGATGGCC  
GTGTTGAGCCCTGCTCCAGAGATGCCGATGGCTCCGAGTGATTTTCATGAACTTTTCGCCGGTCTATTCCCCTG  
TTTGCTCGGACTGATCCGAGCCGAGATTGGTCTTCTGTTCATGGGTTAACACCCACCAAATAGAAAGTATGGA  
GACATTATTTTCGCTAACTATTTATCCAAACAAAACGATGAGTGGAGGCGAATTTGTTTCATAAGCGCTACAA  
TATTGCTAATACGCATCCGGTAATTTATATCCAACCACTCTATTGGATAAATACAAAATTCGATTCGAAGAGGG  
GAGAGATTTATCCAGTTTCAATATAAACTTCCGGTTATGTCCGGTCCCGAGTAGCGGAGCTGTTAAATCAC  
CTTGACACACAGAGGAGATGTCCTGAAGAGTCTAGAAGAAGGACACTCTGACCAGCCGT

**Replicon: True-ADL                      Shared region: 1234151..1243860**

CGATCGTGGAAGGACCCAAATCCCAGCCAGACCAAATAGAGCACGTCGAGCGGAGCGACGTCGGTGTCTCAC  
TCACTGTGCAACTCACTCGTGGGACGGGACACGGGATCAAGACAAAATAACAGCGAAGGTGAAAGCGAAAA  
CCTTGGAGGAGGCTCGAACCGACATGGAGACTCTTCGAGCATATATTGACGACCTTGCTGAGTCGACACGCC  
AGATCCAACCAGCAGAGGTACCCAAGTAGCGAGTCGACCTGATTTTTTTCATCGCCTACCAAGGGTAGAGGC

GATTTAATTGAGTAATTCAGCAGATCAGTCCACAGAATCGAGTGGCCTCACCCACAACAGCGTCTCGAATC  
GTCGAACACTCGGCTCGTCGACGCAGGCATTGCGACGATCAAGGATATGGAGACGCTGCGGGCGTGTGTGCG  
CTATGAAAATGCGAACCAACGCCGGTTCTGATTCTCCATCGTCTCAAGCGACGAGCTGACGAGATCCGGGC  
CGAAGTCGAATAGAAGAGCACTCACTGACTCATTCTGGGCCACGCGATGTTAACCAACTCAGCCGTAAC  
GACGAATTTTGGTTAGACTGCTACTGATAACGATTTTTTTCTCCCCGAGAGGTGTGCGGGGAGCGAGT  
TCTCGCAATGATTCAAAATGGCATTATCAGCACGTTTCGACCAGTAGCAAAGCCAGCGAGATTGTAGCAGCTC  
GAGAGACCGACTACGTGCGATTTCTCCACCGCTTCCCTTCGCGTTAGATGCCTTCAACCTCGGTTTTCTCA  
CCGGCTTTTCGAGAAGACTGTACTTACCAGCAAACCAATACACGGATTTGGAGTTGCCAGTTGGAATGCTTG  
ACAACGACTTCCGGAATCCCGATCTCACTCGATACGTGGAGCGGTTTTTTTCGGTACGAACCACAGGTGCGCG  
GGGATCGGGTGTGCCTACAGCGTCGACGAGGTGAGGAATACGTAGCTGCTGCTCGCGATATCCAAGCAGG  
CTATCCAGGAATCAGAGTTGGTGTATCGTCCCGGAGGTGCCGGTGCAGCCATTTCATGCAGTACAGAGGACTCA  
TCGTGGGAATACCTCAGGGGATACGCTGAACAGCTAGCTCAGGATTTTCGGAGCGACTGAATGGCCGTGG  
TCGACGTGTATTCTCGAGGGGAGTCAATGACACTCAAGGGGATCAGCAGCTACTGTCATCGTGACGGGTGA  
TCTCTCTGGCGAGAAATTGTGTCCGGGCCTGTGAACCTGGA

CTTTTTTGGGCAAGCCCTTCTTGAAAGCCGCTGAAGAATCGACCCCTGTACCGTCAGTCGTGATCGACGGTG  
GCCGAATATCATTATCGAGCGCCAGCAGTAGGTGCGGAGCGTACTTCTGTGACACTCAGTAATTGCTTTTCG  
AGCGTTCCCCTCGGTGAGTTAGCTCATCTGGACGAGCCCTGCGAGTGTCCGTTGGTTCGAACGTGCGAAACA  
CCGGCCAACGCTCTGTGCGGCGGTCCATCAGCTGGCGATAGCTCCGCAGCGGCGTAATAACCGGGTGGGGA  
GACTCGCGGCGTCCCCTGCTGTTTTCTCCGGTAGACGTCCATACTCCCCTCGTCGAGCGAAAGTTCCCTCCC  
AGCGGACGCCACGTGACGCGGATCGTTCCGGTCCCAGAAGAAGTTCCCCGACCCGAACGGCGGTGTATGCTA  
GGACGAACACCAAGGCTCGGTCTCGGGCAGCTCTCAGGGCAGTATATCTAGCTTGTGCTTCTCACGTGGGT  
CGACATCCTCTGAGAGTGTAGTGAGTGCCTCGATGGCATTACGGGCTTGTTCGTGACGCTGACGGGTAAGTG  
CGTGACGCTGCTTCGGAGGTCCAAGCCTGCTGGTACCAGGCTTTCGACCGTTCGTATCAGGGAGTGGCGC  
GGTCGCACTGGCCCGCTGGGCGTAGTGTGCTTCAAGATAGCCTTCGTTTGACACACCAGCCGCACCACGTCA  
AGTTTACGAACGACACAAAACGTTTTCACGGCCTCTCTTACCCCGTATATCCTGTATCAAATTTTTTCAGCTG  
ATGTTACTGTCTAAAACCTATTTCGATGTGTTTGATTGTTTTACTAAGGATAACTCCCATAGAACTTATTT  
TCTAGGTTTTGTTTTTGACACCGCTGATCCCTACGACTGCGTATAGAAA

**Replicon: True-ADL            Shared region: 1243876..1250380**

CTTTTTTGGGCAAGCCCTTCTTGAAAGCCGCTGAAGAATCGACCCCTGTACCGTCAGTCGTGATCGACGGTG  
GCCGAATATCATTATCGAGCGCCAGCAGTAGGTGCGGAGCGTACTTCTGTGACACTCAGTAATTGCTTTTCG  
AGCGTTCCCCTCGGTGAGTTAGCTCATCTGGACGAGCCCTGCGAGTGTCCGTTGGTTCGAACGTGCGAAACA  
CCGGCCAACGCTCTGTGCGGCGGTCCATCAGCTGGCGATAGCTCCGCAGCGGCGTAATAACCGGGTGGGGA  
GACTCGCGGCGTCCCCTGCTGTTTTCTCCGGTAGACGTCCATACTCCCCTCGTCGAGCGAAAGTTCCCTCCC  
AGCGGACGCCACGTGACGCGGATCGTTCCGGTCCCAGAAGAAGTTCCCCGACCCGAACGGCGGTGTATGCTA  
GGACGAACACCAAGGCTCGGTCTCGGGCAGCTCTCAGGGCAGTATATCTAGCTTGTGCTTCTCACGTGGGT  
CGACATCCTCTGAGAGTGTAGTGAGTGCCTCGATGGCATTACGGGCTTGTTCGTGACGCTGACGGGTAAGTG  
CGTGACGCTGCTTCGGAGGTCCAAGCCTGCTGGTACCAGGCTTTCGACCGTTCGTATCAGGGAGTGGCGC  
GGTCGCACTGGCCCGCTGGGCGTAGTGTGCTTCAAGATAGCCTTCGTTTGACACACCAGCCGCACCACGTCA  
AGTTTACGAACGACACAAAACGTTTTCACGGCCTCTCTTACCCCGTATATCCTGTATCAAATTTTTTCAGCTG  
ATGTTACTGTCTAAAACCTATTTCGATGTGTTTGATTGTTTTACTAAGGATAACTCCCATAGAACTTATTT  
TCTAGGTTTTGTTTTTGACACCGCTGATCCCTACGACTGCGTATAGAAA

GGTTCGAGATCCTTCCCTCCAGAACTCTCCGAAAGATCGGTGCTGGTGTGCGACGAAAGGCCGCGAGAAATGA  
CCGCACACCGTGTACTGAACCACTGGTGGGTTGGTTTTCTCCGCGTAGGATCAAGGCCTTCTGCTTCGAG  
ACACGGAGCAACCTGCTCCAGTAGAGCTGTGTGAAGTCTTCGAGTGAACAGGCCGACCACCGGACATCGTC  
GAACGAAGGCTGCTGTGGTTTCGAGCTCGTTTTCTGATCGGACTCAGGGTGACTCATTGGGTTATGCCCCGG  
CTGTTGTCTGGATGAGGTTCTGAGAACAGATTTTCGAAGTAGAAGCCTGCTCGCTGCCTCGTGTGGTAATTCT  
AAGAGTCCCATATTCTGGTTGTTTCAGTCATTTCAGTAGGATTAATTATAAATTTATGGGTTACGCTGACTACG  
AGAGTCTGCTAAACCCATGGTATATTCCGGCGGAAACCACGCCACATCAATAAATCACATATTGCGATATAG  
ATTTCTGGGCAGTCACGCTGCGAATGGCGGCTCTCACGTACGAGGTAGACGTTTTCTCGCCGGTATTTCGCG  
GCAGATTAAGGGTAAATCAGTGTAATAAATCCGTCTCTTAGAACTATCTCGTTAAATACAAGCAACTAATTGC  
TGAAAATAAACAACCGCGAAAAGATGTCTTACCAGGCTAGCAGACCTGGAACATATAATATAAACAACAG  
AGTGTGTGGTTGTACGGCCTGTGTTGGTTAAGTCATATCAGCAATCCCGATTTGAAGATGAGCAACTAGATG

TCTAAAAGGCTGATTTCTTTCCAGACAGCTGAACTCATGTATCACAAAATGTTTCGTTTAAATTATAGTGCTC  
TTAATCGAGATTTATATCAGGCATGTCGTACGATAATTTAGACAGGTCAGTTAATCAACGCACTACTCGATG  
ACGGGTCGGGCCAGCCCTTCGAAGCCTTGGAGAGGGGCTTGATGTATCAGTGACCACCGTCTTCAAATCACA  
TCAACGATTCTTCGAAGCAGAAGGTGTTATTGAAAGGCTATACACCGGTTTCATTAACACGGCGAACTGGGC  
TACGACGTACCGCATTATGCAGCTGATGTCGAAGGATCCGCGCCTTGCAAAATTGTCGACAGCTTTTCGCGA  
CAGGTACGATATCCACTGTTCTATTGAAGGTCACCGTGATTAGACCTTATTGGCATTGAAGTCCGAGATACA  
CGGAATGAACCGCTCGGAATCCAAGAGACTGCTCATCTTGTGCCGTGTGACCCATAGTAC

## Materials and Methods

**Sample collection and processing for metagenomics from Deep Lake.** Water samples were collected from DL (68°33'36.8S, 78°11'48.7E), Vestfold Hills, Antarctica between November 30 and December 5, 2008 (Fig. S1). Water was collected by dinghy from above the deepest point in the lake by pumping water directly from 5, 13, 24 and 36 m depths into 25L drums and immediately processing samples on-shore by sequential size fractionation through a 20 µm prefilter directly onto filters 3.0, 0.8 and 0.1 µm pore sized, 293 mm polyethersulfone membrane filters (12,13,17-22). A volume of 50 L was filtered for 5, 13 and 24 m depths, and 25 L for 36 m depth. Samples were preserved in buffer and cryogenically stored, and DNA extracted as previously described (12,13,18-22).

**Isolation, growth and genomic DNA extraction of DL haloarchaea.** tADL (NCBI taxon ID 758602), DL31 (NCBI taxon ID 756883) and DL1 (NCBI taxon ID 751944) were isolated from DL surface water collected December 2006 (tADL) and November 2008 (DL31, DL1) (Fig. S1). Pure cultures were recovered from water samples using an extinction dilution method (23) and DBCM2 medium (24,25). All cultures were incubated at 30°C. Repeated rounds of limiting dilution titrations produced pure cultures, as assessed by microscopy and 16S rRNA gene sequencing (16). For large-scale cultivation, cells were inoculated into 200 ml of DBCM2 medium in 500 ml capacity, cotton-wool stoppered flasks. Cultures were shaken (100 rpm) at 30°C until late exponential phase and cells harvested by centrifugation (5,000 rpm = 4066 x g, 15 min, 4°C, Sorvall GSA rotor). The cell pellet was resuspended gently in 2 ml of a solution containing 20% (v/v) glycerol and 2 M NaCl. Cell lysis and DNA purification was performed using Qiagen genomic tips (500/G), and the manufacturer's protocol for the extraction of DNA from bacteria (Qiagen genome DNA handbook). The resulting DNA was checked for quantity and quality by spectroscopy ( $A_{260}/A_{280} \geq 1.95$ ) and by agarose gel electrophoresis. PCR and sequencing of the 16S rRNA genes was used to confirm identity and purity of the DNA preparations.

**DNA sequencing.** Metagenome libraries for pyrosequencing were constructed using DNA from 0.1 µm filters (at 5 m, 13 m and 24 m depth), 0.8 µm and 3.0 µm filters (at 24 m depth) or pooled DNA from all three filter sizes (at 36 m depth) using the RAPID protocol (Roche) and sequenced using 454 technology (26) on a 454-FLX machine using Titanium chemistry. Illumina sequencing (27) was performed from libraries made using DNA from 0.8 µm and 3.0 µm filters from the 24 m sample only, using recommended protocols (Illumina), and were sequenced on the Illumina GAIIx using paired-end 76 cycle reads. Pyrosequencing of PCR amplified V8 region of small subunit (SSU) rRNA genes was used to generate microbial community profiles. The 454 adaptor-added SSU rRNA gene primer set, 926Fw (5'-3'AAACTYAAAKGAATTGRCGG) and 1392R (5'-3'ACGGGCGGTGTGTRC) was used in PCR to amplify the V6-V8 region, with 5-bp barcodes incorporated into the reverse primer to multiplex samples. PCR amplicons were sequenced by the DOE Joint Genome Institute, using the Roche 454 GS Titanium technology as previously described (28). Sequences were analyzed through the Pyrotagger computational pipeline (<http://pyrotagger.jgi-psf.org>) for quality trimming, clustering to operational taxonomic units (OTUs) based on 97% sequence identity, and



taxonomic assignment by blastn against the Greengenes database (29). Singletons and potential chimeras were removed to minimize PCR artifacts. Draft genomes of the DL haloarchaea were generated at the DOE Joint Genome Institute (JGI) using a combination of Illumina (27) and 454 technologies (26). Briefly, for each genome we constructed and sequenced an Illumina GAii shotgun library, a 454 Titanium standard library and a paired end 454 library with an average insert size of 8-10 kb. All general aspects of library construction and sequencing performed at the JGI can be found at <http://www.jgi.doe.gov/>. The initial draft assemblies were generated using a Newbler/VELVET (30) hybrid approach. Manual finishing of all genomes was then performed at Los Alamos National Laboratory using a combination of computational tools, as well as PCR fragment subcloning and PCR-based primer walks.

**SSU rRNA gene profiling.** The taxonomic affiliations for SSU rRNA gene V6 tag sequences contributing to >0.2% of all sequences derived from 5 m, 13 m, 24 m and 36 m depths combined in DL were resolved by alignment of tags and their five nearest blast hits from NCBI to the Greengenes 2011 alignment and insertion by parsimony into the guide tree. Class level taxonomic affiliations of SSU rRNA gene V6 tag sequences comprising <0.2% of all sequences derived from 5 m, 13 m, 24 m and 36 m depths in DL were derived from blastn against the Greengenes database. Phylogenetic tree construction was performed using the software package ARB (31). Full-length SSU rRNA gene sequences from the four DL haloarchaeal genomes were aligned to the 2011 Greengenes reference phylogeny (32) and incorporated by parsimony into the reference tree consisting of 408,315 sequences. Reference outgroup sequences from major *Archaea* groups, along with close neighbours of the four DL haloarchaea were chosen for *de novo* tree construction using the Neighbour-Joining algorithm with Jukes-Cantor correction.

**Fragment recruitment, highly degenerate regions and reference mapping.** Fragment recruitment (FR) was performed individually on each sample and carried out against all publically available complete and draft bacterial, archaeal and viral genomes from NCBI, all organelle genomes from EMBL and the four DL haloarchaea (tADL, DL31, *Hl* and DL1) as references. The only eucaryal reference examined was a halophilic green alga *Dunaliella salina* CCAP 19/18 (<http://genomesonline.org/cgi-bin/GOLD/bin/GOLDCards.cgi?goldstamp=Gi13840>), where the raw draft sequence was masked for low complexity sequence using RepeatMasker version 3.3.0 (-noint). FR was performed independently for each reference using FR-Hit version 0.5.8 (33) (read coverage > 90%, alignment identity > 98%) and the resulting combined set of read assignments across all genomes was reduced to a non-redundant set by selection of the single longest and highest identity alignment per read. The genomic coordinates of highly degenerate regions (read depths > 3-fold median replicon read-depth) were determined by application of peak detection using custom scripts in R applied to replicon nearest-neighbour smoothed (radius 200 bp) read-depth traces. Sequences extracted from these regions were subsequently reduced to a non-redundant set by clustering with CD-Hit version 4.0 at 98% identity and annotated by BLASTX against Refseq\_protein (e-value <  $10^{-5}$ ). FR was repeated on post-filtered DL metagenomic reads. Reference mapping was performed with GS Reference Mapper v2.6 for each genome against all DL samples

(98% minimum overlap identity, 100 bp minimum overlap length). Gephi version 0.8.2 was used to visualise and calculate statistics of networks (34).

**SNPs and recombination.** Paired-end Solexa runs from 36 m depth were aligned with Bowtie version 0.12.8 (35) to the four DL haloarchaeal genomes following recent methodology (1) with parameters: -t -n 1 -l 20 -e 80 --solexa1.3-quals --nomaqround --best --sam --chunkmbs 128 --minins 100 --maxins 500. Subsequent SNP identification was performed using Samtools version 1.1.16 with parameters: -c -C 50 -N 4. SNPs where mapped read-depth above 20-fold and variant frequency above 0.9 were considered fixed mutations within the DL population. PIIM v2.02 (36) was used to infer scaled rates of mutation and recombination ( $\theta = 2N_e\mu, \rho = 2N_e c$ ) for each DL isolate replicon. PIIM's pre-generated likelihood lookup table limits read-depth to 50-fold, therefore requiring downsampling of our data. Downsampling by random selection was performed using Picard v1.77 (37) and BAM to ACE format conversion accomplished using Consed v23 (38). Rates were estimated in sliding 50 kb windows and resampling repeated 10 times with randomly selected seeds. Confidence intervals (95% CI) for  $\theta, \rho$  were estimated by bootstrapping in R (N=10,000) using the boot (39) package. Rates estimation in PIIM was performed using the likelihood lookup table for  $\theta = 0.1$ , since as many as 25% of predictions resulted in  $\rho = \infty$  when using  $\theta = 0.01$ .

**CAI/CBI.** Codon adaptation and codon bias indexes (CAI/CBI) (40) for each genome were determined by CodonW version 1.4.4 (41). Putative optimal codons sets were determined by a two-way Chi-squared contingency test of the two extremes of the principle trend of a correspondence analysis, where sampling of codon frequency was restricted to the primary replicon of each isolate.

**Ortholog groups.** Ortholog groups of the 17 haloarchaeal completed genomes (tADL; DL31; *Hl*; DL1; *Haladaptatus paucihalophilus* DX253; *Halalkalicoccus jeotgali* B3, DSM 18796; *Haloarcula marismortui* ATCC 43049; *Halobacterium salinarum* R1, DSM 671; *Halobacterium* sp. NRC-1; *Haloferax volcanii* DS2, ATCC 29605; *Halogeometricum borinquense* PR3, DSM 11551; *Halomicrobium mukohataei* arg-2, DSM 12286; *Haloquadratum walsbyi* HBSQ001, DSM 16790; *Halorhabdus utahensis* AX-2, DSM 12940; *Haloterrigena turkmenica* DSM 5511; *Natrialba magadii* ATCC 43099; *Natronomonas pharaonis* Gabara, DSM 2160) were determined using OrthoMCL version 2.0.2 (42) with parameters: -I 1.4. Granularity was adjusted for best agreement between the resultant clusters and known single copy genes (e.g. ribosomal proteins, tRNA synthetases) (4). The function of ortholog groups was inferred by homology to Archaeal COGs (43), where HMMER version 2.3.2 was used to create profile HMMs for each group from Clustalw2 multiple sequence alignments and ArCOG assignment decided by a simple voting heuristic. Core haloarchaeal genomic content was defined as ortholog groups shared as single copy genes between all 17 genomes and permitting one doublet (894 groups). DL flexible content was defined as those ortholog groups (68 groups) shared between at least one secondary replicon from each DL isolate and tADL.

Selection –  $K_a/K_s$  ratios ( $\omega$ ). Single copy ortholog pairs were identified between tADL and *Hl* (within population) and tADL and *H. volcanii* (between population). Clustalw2

was employed for multiple sequence alignment and  $\omega$  was estimated by KaKs\_calculator (44) using AICc model selection (-m MS).

**Genome characteristics of niche adaptation.** Genomes were interrogated for the presence or absence of genes that encode proteins and metabolic pathways that may provide ecophysiological distinctions between the four DL haloarchaea. COG scrambler (45) was used to identify statistical representation of COG categories and individual COGs between the four DL genomes.

**Whole metagenome assembly.** The whole metagenome of DL was assembled using Celera WGS (v6.1), with the recommended component pipeline for 454 Titanium data. An initial assembly was performed with default runtime parameters, with the exception of 3.0% utgErrorRate. Celera WGS estimation of genome size and consequently its effect on the discriminating statistic (a-stat) categorising early contigs as degenerate (repeats) performs poorly on datasets which do not represent a single organism. The tendency to over-estimate genome size leads to an increase in false positive rate of degenerates. To mitigate its effect, genome size was reduced manually by 2-fold and the assembly repeated post-overlap stage. This was repeated iteratively until the rate of change in degenerate assignment began to slow. The previous step was then taken as the final result. Genome size was reduced 4-fold from the predicted 88 Mb to 22 Mb. From 6,626,699 usable reads, assembly resulted in 16,551 contigs (mean length = 2736bp), 634 large contigs ( $\geq 10$ kb) totalling 12 Mb in total length and 15917 small contigs totalling 33 Mb in total length. An additional 61 large contigs ( $> 10$ kb) classified as degenerate (mean read-depth = 200) were also analysed. For assembled contigs the low complexity of the DL metagenome permits inference of replicon source by cluster analysis in a two-dimensional space composed of GC content and mean read-depth. Restricted to lengths greater than 15 kb, contigs belonging to each primary replicon of the three abundant isolate genomes were identified by stringent BLASTN assignment (coverage  $> 90\%$ , e-value  $< 10^{-10}$ ). Model based clustering using Mclust (46) was performed in R with background Poisson noise to compensate for the presence of outliers belonging to no cluster. As tADL contigs were clearly separated, clustering was limited to a subspace ( $20 < \text{read-depth} < 100$ ). The unlabelled cluster (center: GC=0.63, RD=38.3) comprises 52 large contigs ( $> 15$  kb) totalling 1.89 Mb in total extent and subsequently referred to as tADL-related 5<sup>th</sup> genome. Contigs attributed to the tADL-related 5<sup>th</sup> genome were mapped to tADL by CONTIGuator (47) using default parameters. Annotation was performed using SHAP (48) and predicted genes stringently assigned (e-value  $< 10^{-10}$ ) to orthologous groups by Hmmpfam.

**Similarity comparison.** Average nucleotide identity (ANI) and tetranucleotide usage deviation (TUD) regression coefficients were determined between all replicons with JSpecies version 1.2.1 (49) along with the “tADL-related 5th genome”.

**High identity regions (HIR).** Long range HIR between DL haloarchaeal genomes were identified using NUCMER all-vs-all, where only regions with greater than 99% identity and longer than 5 kb were kept. Flanking regions (2000 bp upstream) were compared against Refseq\_protein using BLASTX (e-value  $< 10^{-5}$ ) where overall genomic content

was assessed by categorisation as insertion sequence, mobile element associated, or other. The 13 identified regions longer than 10 kb were reduced to a non-redundant set of 12 sequences using CD-hit (99% identity). To infer putative replicon source (lineage) for the 12 non-redundant regions, TUD regression coefficients were calculated between all 12 regions and all 9 DL replicons using JSpecies.

An all-vs-all analysis was carried out between 25 finished HA genomes (Table S9). ANI by BLAST was determined using JSpecies and the total extent in base-pairs of long shared HIR was determined using NUCMER. For HIR, only alignments greater than 99% identity and longer than 2000bp were considered, where the length criteria was chosen to minimise bias attributable to short, possibly well conserved mobile elements such as insertion sequences. The total length of the resulting alignments were then summed for each genome-pair. Two symmetric "comparison" matrices of genome-pair values for ANI and  $L_{HIR}$  were constructed. Due to the large value range and presence of zeros,  $L_{HIR}$  matrix elements were transformed by  $x'_{ij} = \log_{10}(x_{ij} + 1)$  prior to further steps.

Fifteen metagenomes from hypersaline environments were obtained from the Sequence Read Archive (<http://sra.dnanexus.com>) in fastq format. Reads were converted to multi-fasta by in-house script and fragment recruitment performed independently for each long (>10kb) HIR using FR-Hit version 0.5.8 (33) (read coverage > 50%, alignment identity > 70%) against these metagenome readsets.

Matrix element definitions for each of the two matrices:

$$ANI_{i,j} = ANI(genome_i, genome_j)$$

$$L_{HIR_{i,j}} = \log_{10} \left( \sum_{i=1}^n length_{i,j,n} + 1 \right)$$

**Insertion Sequences (ISs).** ISSaga (50) was used to analyse and manually annotate DL haloarchaeal genomes for ISs.

**Lake viruses.** Accessions for 55 completed archaeal virus genomes were sourced from the European Nucleotide Archive (ENA) (URL: <http://www.ebi.ac.uk/genomes/archaealvirus.html>) and retrieved from the ENA Sequence Version Archive (URL: [http://www.ebi.ac.uk/cgi-bin/sva/sva.pl?&do\\_batch=1](http://www.ebi.ac.uk/cgi-bin/sva/sva.pl?&do_batch=1)) as DNA fasta sequence. An archaeal virus database was generated from the 55 genomes, where hits from BLASTN with e-value <  $10^{-5}$  were identified as significant. Fifteen contigs over 1 kb and 4 contigs over 10 kb were identified as possessing significant similarity to viruses associated with halophilic *Euryarchaeota* hosts (7).

**PCR and DNA sequencing confirmation of HIR.** PCR and Sanger sequencing was used to confirm that presence of HIR in each of the four DL haloarchaeal genomes, by amplifying and sequencing the boundary regions of randomly selected HIR from all four strains. DNA was extracted from cultures using the xanthogenate-sodium dodecyl sulfate extraction protocol (51). Primers were designed to ensure that the desired amplicons would include sequences immediately before and after the boundary of the HIR.

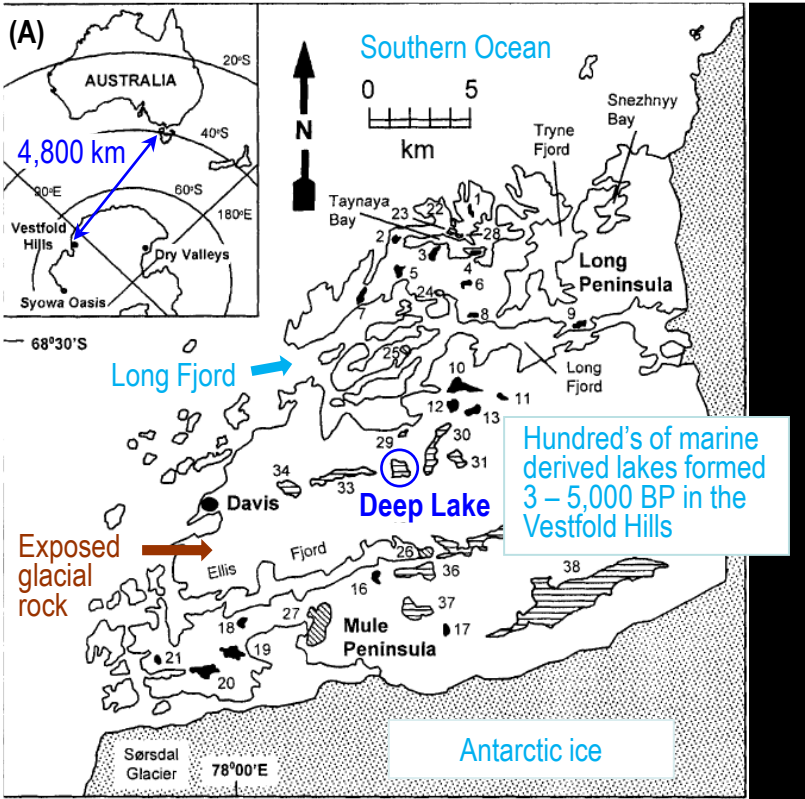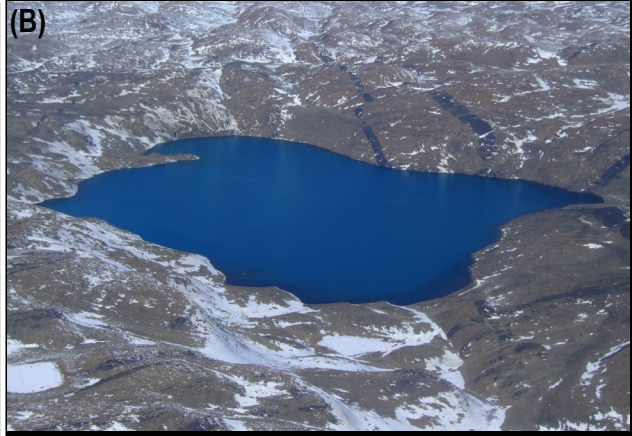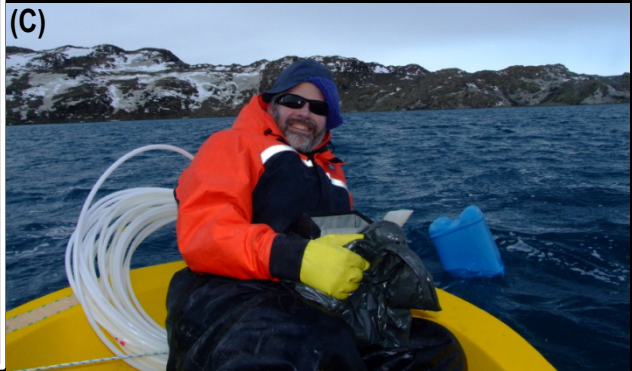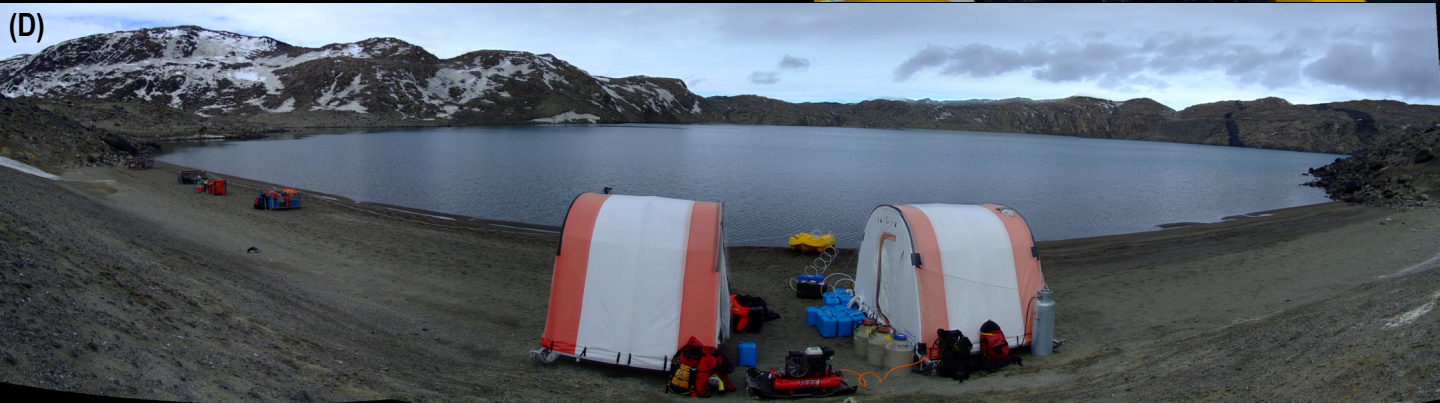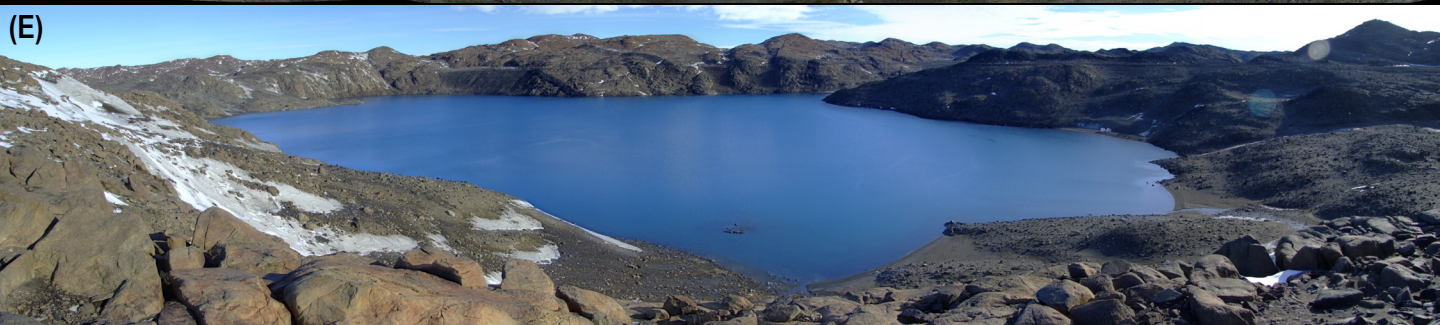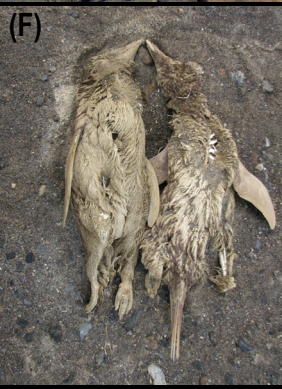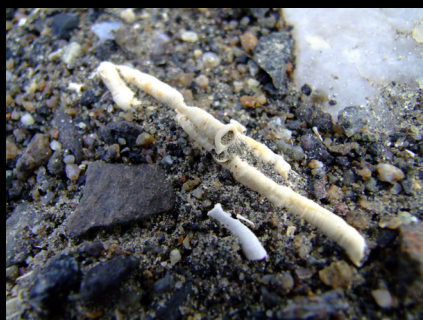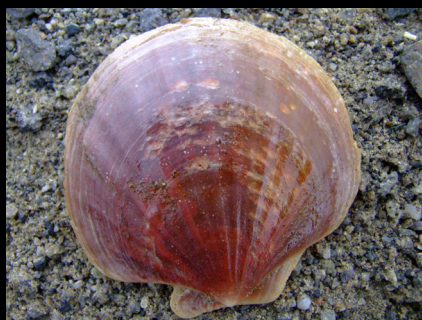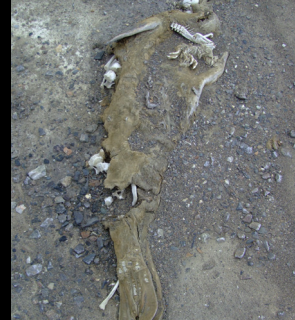

**Fig. S1.** Deep Lake expedition. **(A)** Schematic of the Vestfold Hills, on the eastern shore of Prydz Bay, East Antarctica, showing the location of Organic Lake, adapted from Gibson (11). The Vestfold Hills is approximately 400 km<sup>2</sup> in area and contains a remarkable diversity of more than 300 lakes which range in salinity from fresh to hypersaline (11,52). Most of the saline lakes were originally pockets of seawater, trapped less than 10 000 BP when the continental ice-sheet receded and the land rose above sea-level (11,53). Differing local conditions has led each lake to develop unique physical and chemical properties, and life in the lakes tends to be entirely microbial with low levels of diversity (52,54). Deep Lake is ~55 m below sea-level, consisting of a marine-concentrated hypersaline brine about ten times seawater concentration (55). **(B)** Aerial photograph of Deep Lake, November 2008. **(C)** Sampling from the deepest point of Deep Lake. **(D)** Expedition work site at Deep Lake, November 2008, showing mobile work shelters and equipment for sampling. **(E)** View of Deep Lake from surrounding hills. Work site just visible near the shore on the right hand side of the panorama. The flat line of land in the background marks the water level before Deep Lake was isolated from the sea. **(F)** Relics of a past marine ecosystem are evident from tube worms and shells scattered around the shoreline and hills, and more contemporary preservation of carcasses of penguins and seals are present near shore, possibly having been preserved by the salt and cold for 100s to 1000s of years.

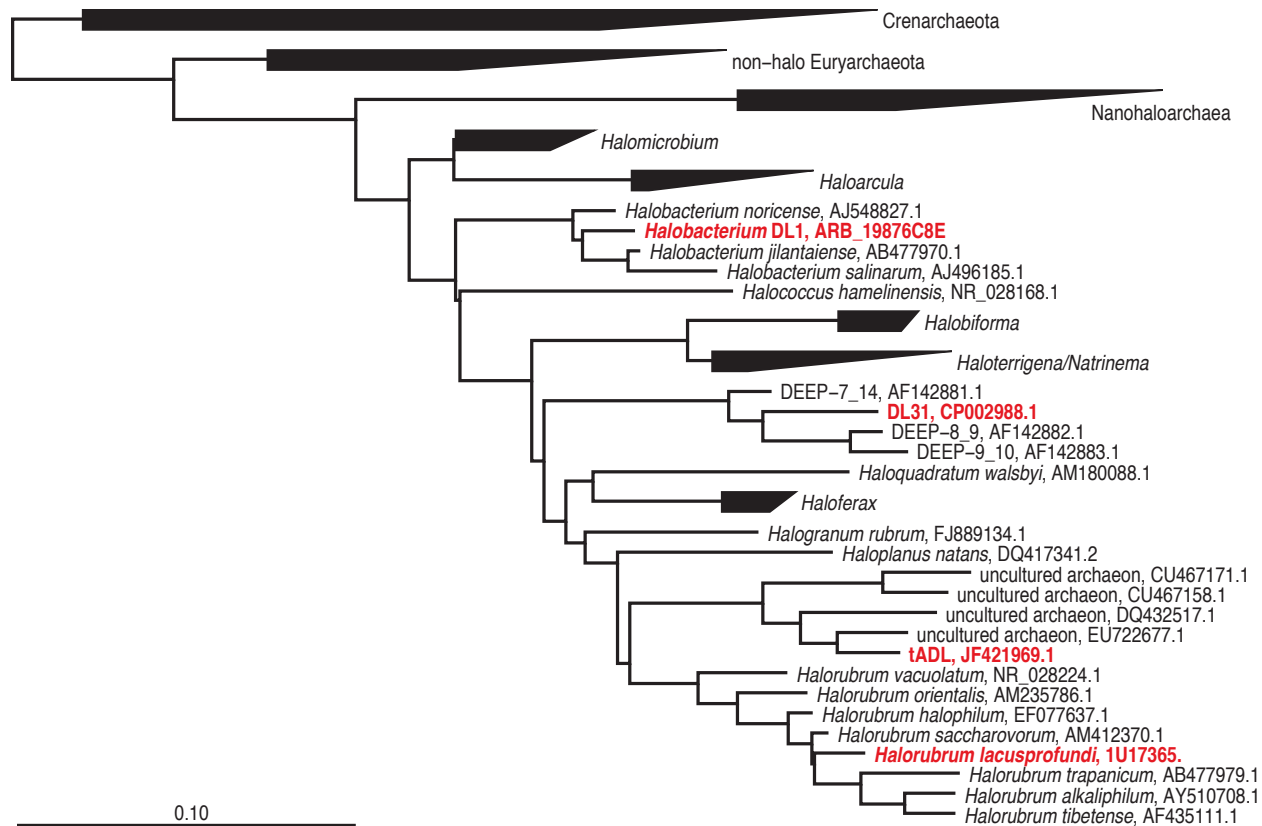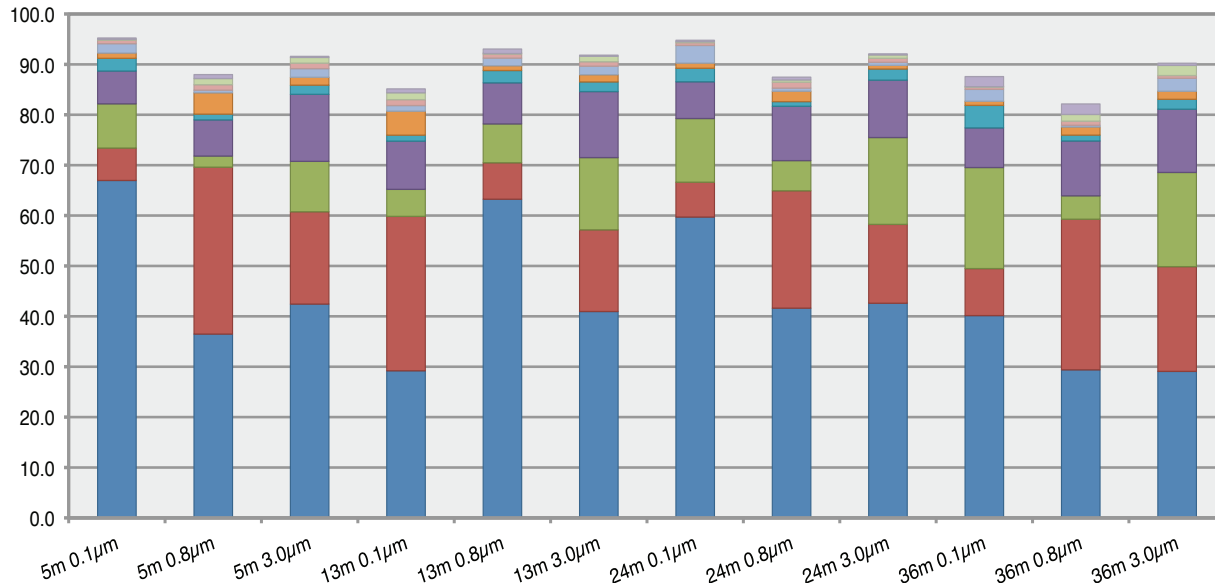

**Fig. S2.** Taxonomy and abundance of tADL, DL31, *Hl* and DL1 in Deep Lake. Upper panel: Neighbour-joining phylogenetic tree highlighting the relationships between the four DL haloarchaea tADL, DL31, *Hl* and DL1. All four DL isolates belong to distinct genera level taxa within the family *Halobacteriaceae*. Lower panel: Bar chart displaying the best taxonomic affiliation down to species level of SSU rRNA gene V6 tag sequences comprising >0.7% of all sequences derived from 5 m, 13 m, 24 m and 36 m depths in DL. tADL (blue), DL31 (red), *Dunaliella* chloroplast 100 (green), *Hl* (purple), DL29-clone (blue green), *Halospina denitrificans* (orange), *Chlorophyceae* (light blue), *Halobacteriaceae* (pink), *Oceanospirillales* (light green), *Bacteriodetes* (light purple).



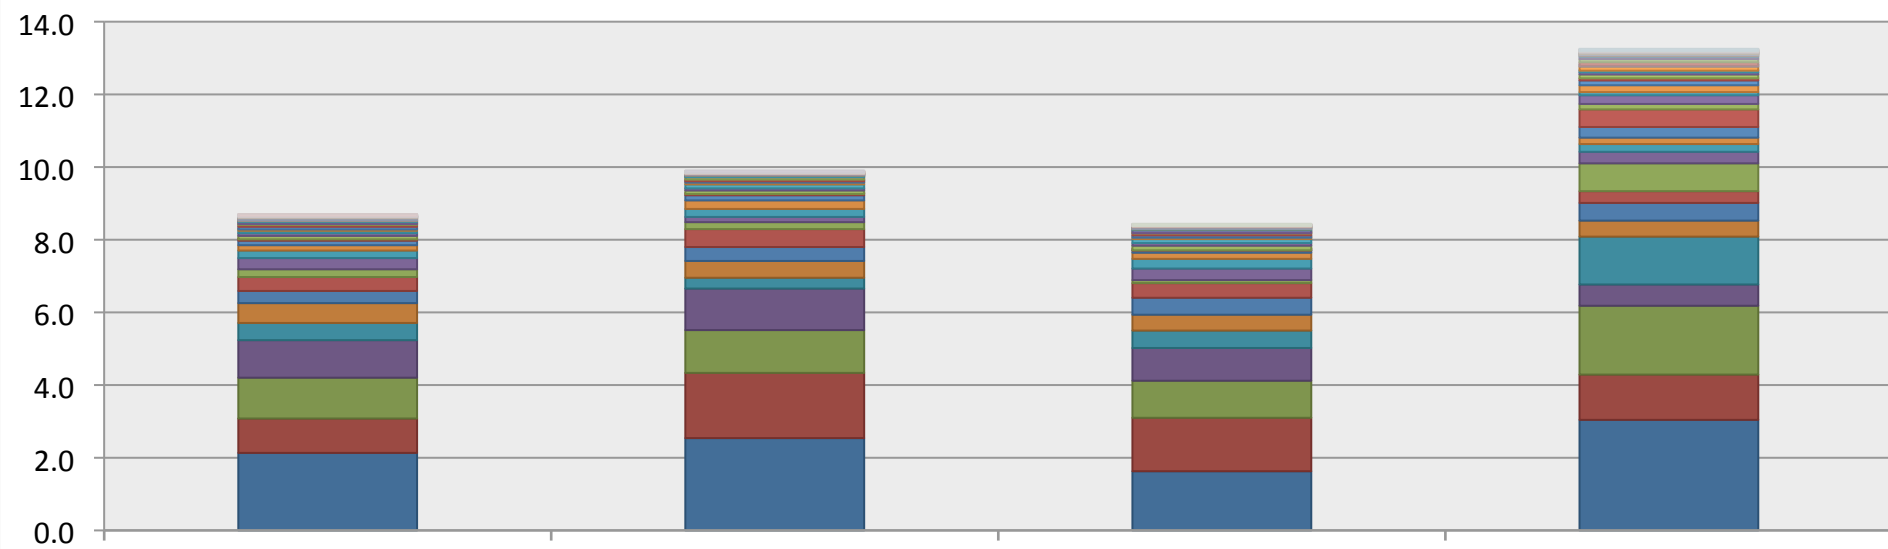

- Gammaproteobacteria
- Haloanaerobiales
- Bacteroidetes
- Halobacteriaceae
- Alphaproteobacteria
- ADL-31-97
- Chloroplasts
- Halorhabdus
- Actinobacteria
- Betaproteobacteria
- Halorubrum
- Halococcus
- Firmicutes
- Gemmatimonadetes
- Halobacteriales other
- Cyanobacteria
- DSEG-3
- Deltaproteobacteria
- Planctomycetes
- Natronobacteriaceae
- Thermi
- Acidobacteria
- Halosimplex
- OP3
- TM7
- Chloroflexi
- OP9\_JS1
- Spirochaetes
- Chlorobi
- TM6
- OP8
- Viridiplantae
- OP11
- unclassified
- Cercozoa
- SC4
- Thermoplasmata\_Eury
- Verrucomicrobia
- Alveolata
- Metazoa
- Methanomicrobia\_Eury

**Fig. S3.** Taxonomy and abundance of rare species in Deep Lake. Bar chart displaying taxonomic affiliations of SSU rRNA gene V6 tag sequences comprising <0.7% of all sequences derived from 5 m, 13 m, 24 m and 36 m depths in DL. Affiliation has been presented at the family level, except in the case of *Proteobacteria* and *Halobacteriales* which have been further delineated (*e.g.* class). These data represent the taxa not already shown in Fig. S2.

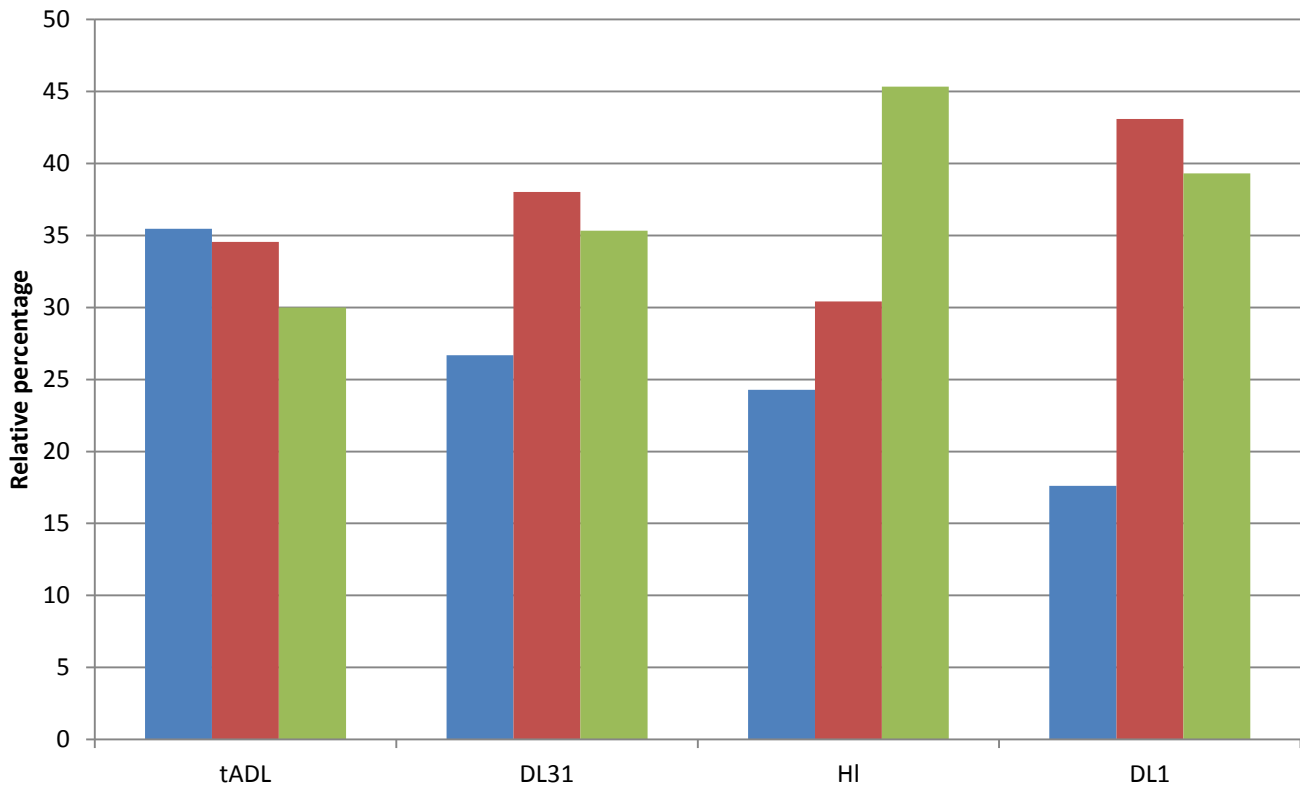

**Fig. S4.** Relative abundance of tADL, DL31, *Hl* and DL1 genomes across Deep Lake. The relative abundance of the four DL genomes averaged across the three size fractions was determined from three analysis methods: SSU rRNA gene pyrotag sequencing (green bars) and FR from metagenomic data generated by Roche 454 Titanium (blue bars) and Solexa Illumina sequencing (red bars). tADL was the most abundant organism in all cases, followed by DL31 (2<sup>nd</sup>), *Hl* (3<sup>rd</sup>) and DL1 (4<sup>th</sup>).

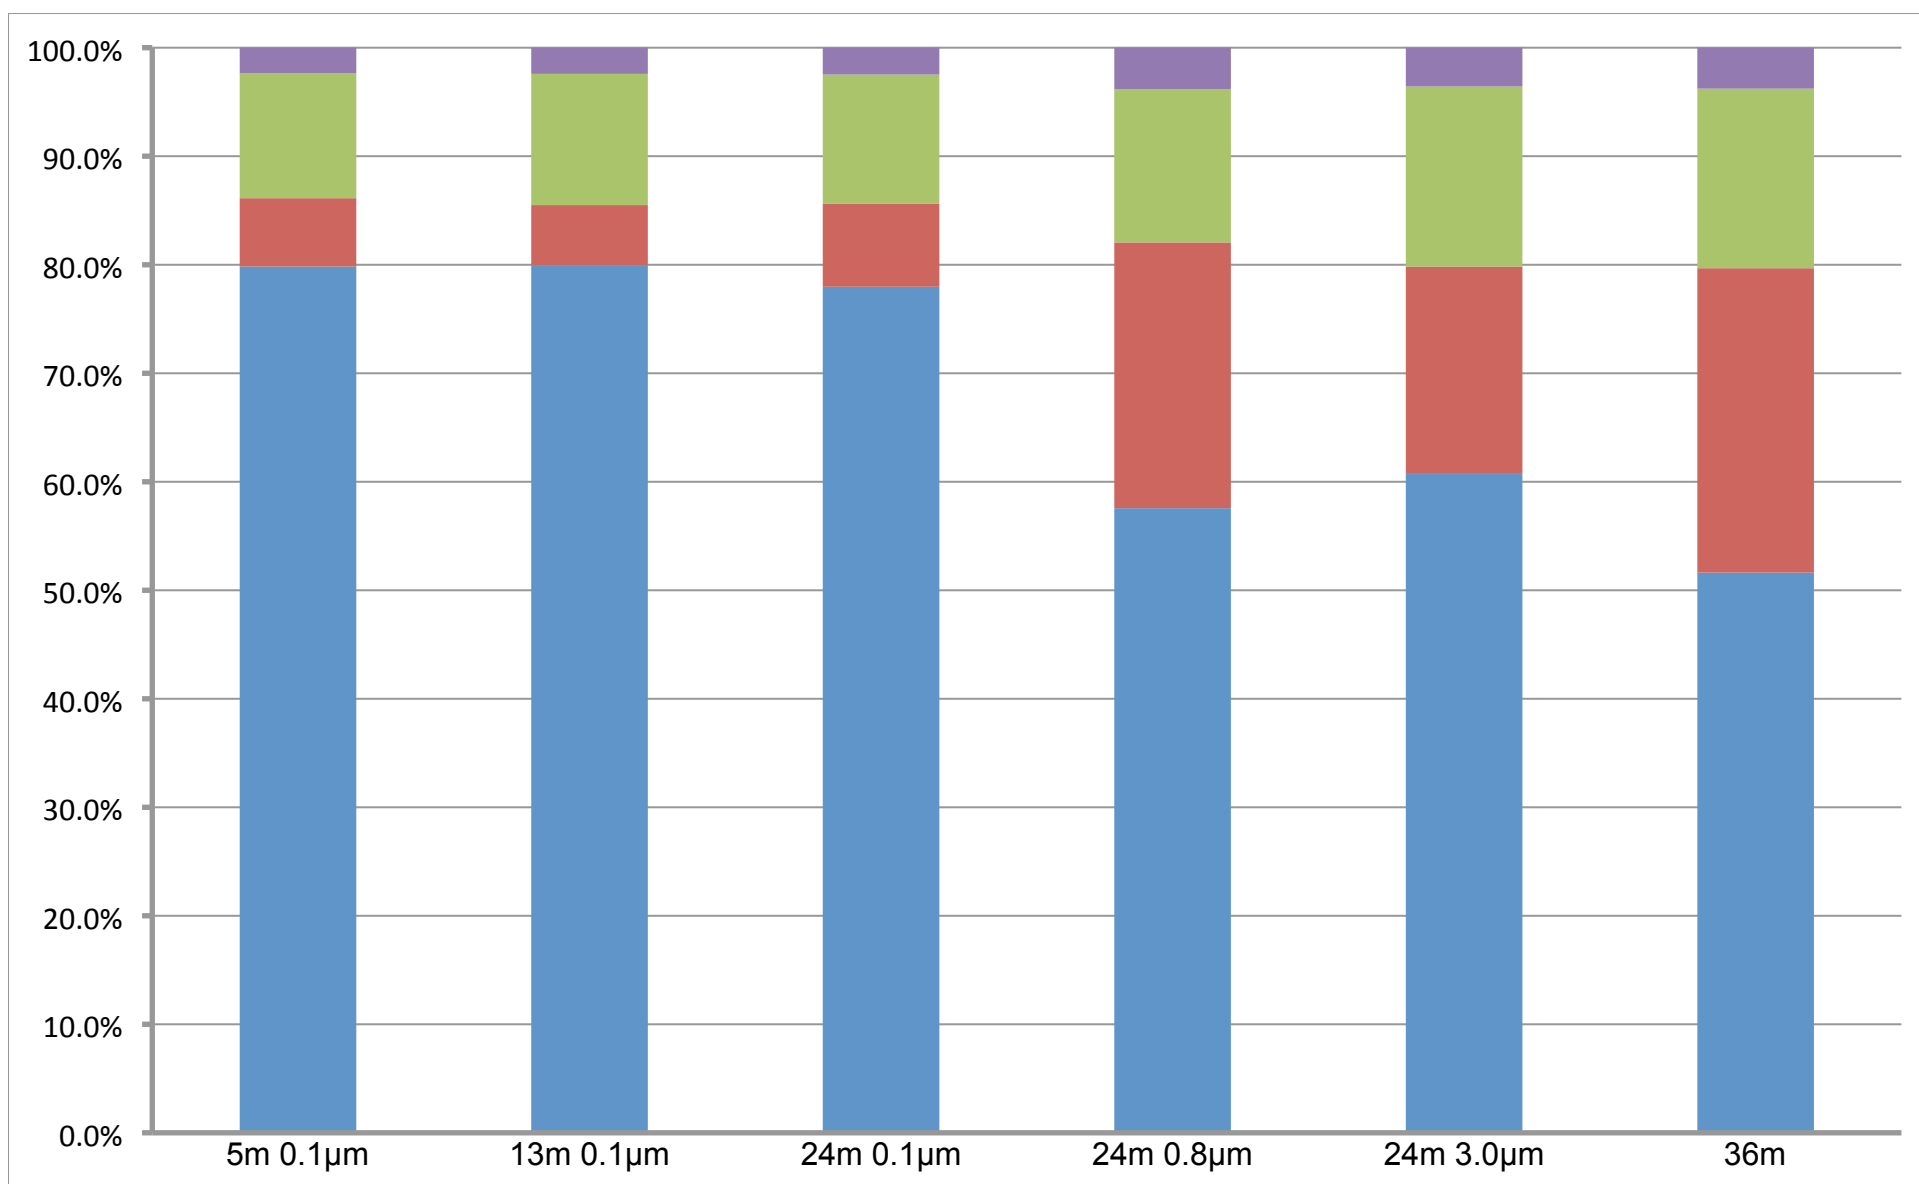

**Fig. S5.** Fragment recruitment across depths and filter sizes. Relative abundance of fragments recruited to the four DL genomes (tADL: blue, DL31: red, *HI*: green, DL1: purple) from 454 Titanium generated metagenomic reads for six dataset (5 m 0.1  $\mu\text{m}$ ; 13 m 0.1  $\mu\text{m}$ ; 24 m 0.1, 0.8 and 3.0  $\mu\text{m}$ ; 36m pooled).

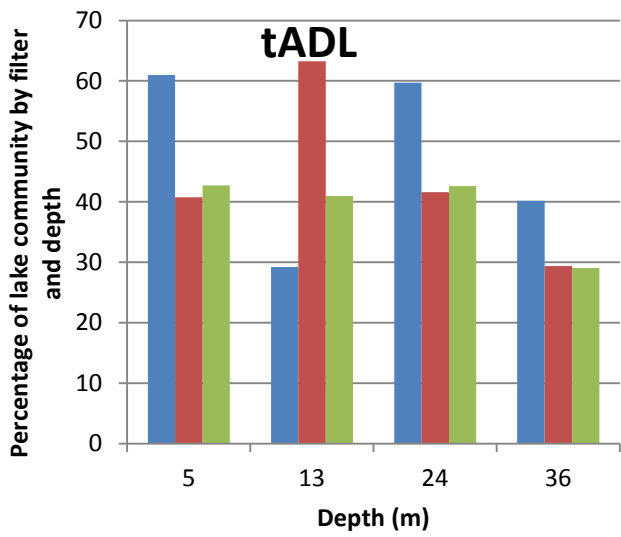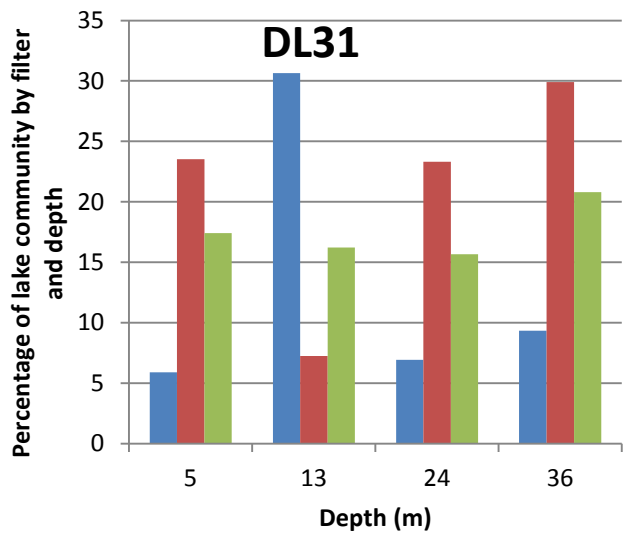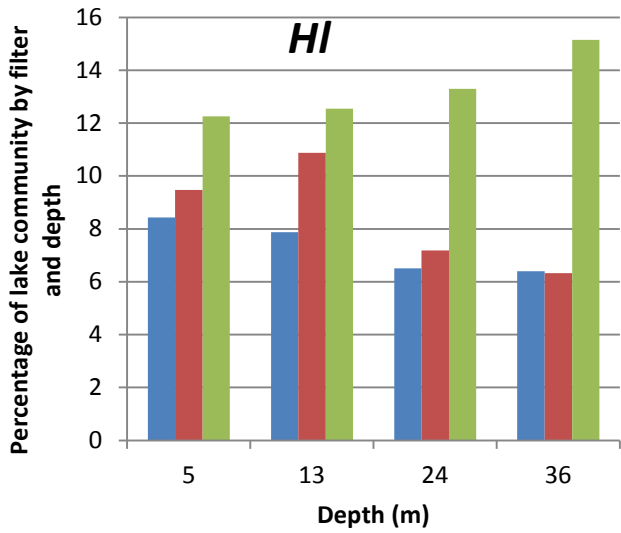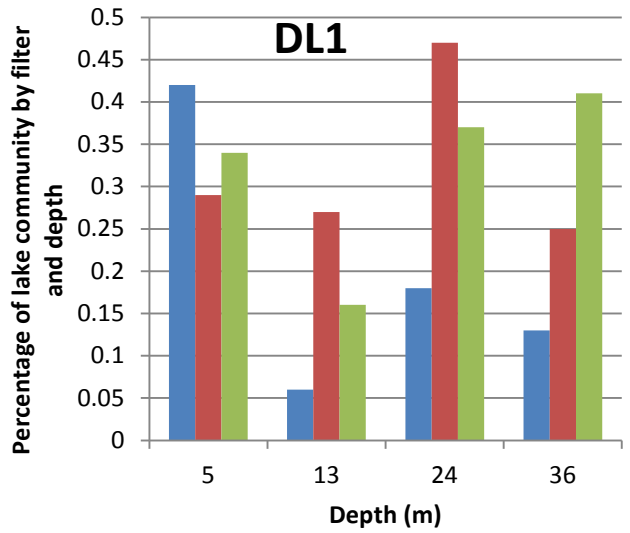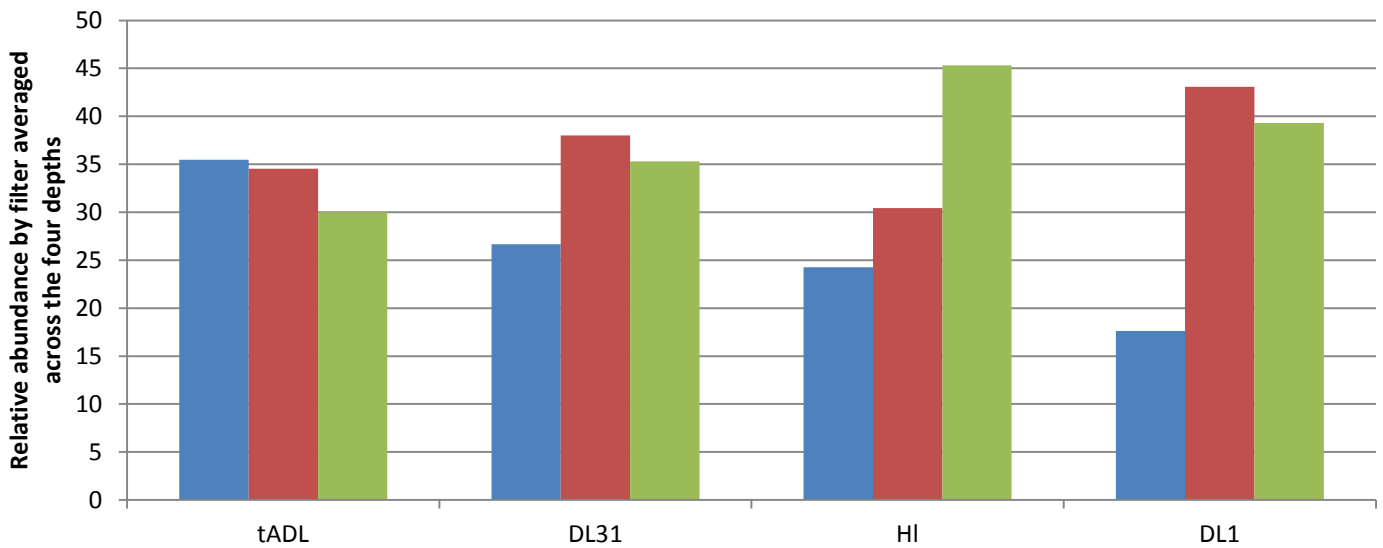

**Fig. S6.** Relative abundance of tADL, DL31, *Hl* and DL1 SSU rRNA genes across Deep Lake. Top four panels: Percentage of total SSU rRNA gene V6 tag sequences for tADL, DL31, *Hl* and DL1 for each filter size and each lake depth. Lower panel: Percentage of total SSU rRNA gene V6 tag sequences for tADL, DL31, *Hl* and DL1 for each filter size averaged across the four lake depths. 0.1  $\mu\text{m}$  (blue bars), 0.8  $\mu\text{m}$  (red bars), 3.0  $\mu\text{m}$  (green bars).



**HI**  
3.69 Mb

**tADL**  
3.33 Mb

**DL31**  
3.64 Mb

**DL1**  
3.16 Mb

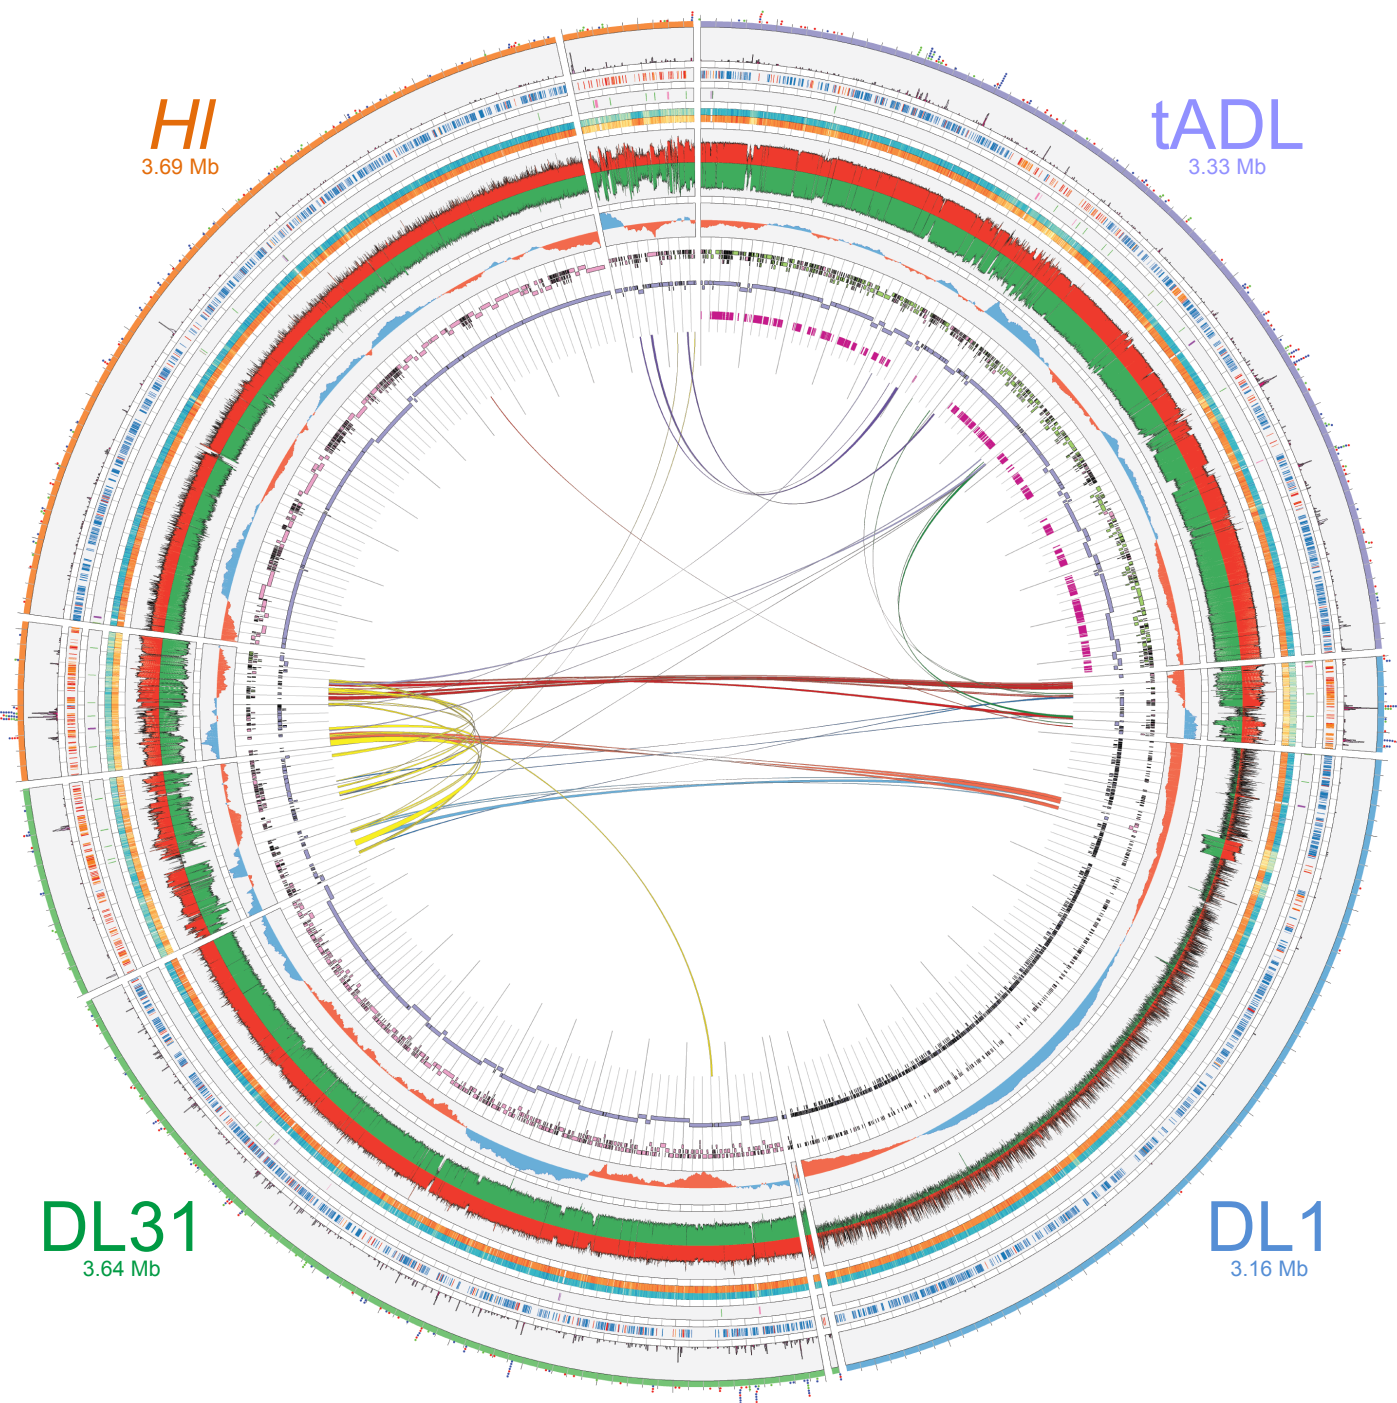

**Fig. S7.** Genome characteristics of Deep Lake haloarchaea: tADL, DL1, DL31 and *HI*. Circos plot (56), outside to inside: Outer filled dots: fixed SNPs (freq  $\geq 0.9$ ), non-synonymous (red), intergenic (green), synonymous (blue); 1<sup>st</sup> annulus: replicon backbones clockwise from the top, tADL (contig-32, purple), DL1 (contig-37, contig-38, light blue), DL31 (contig-113, contig-114, contig-115, green), *HI* (NC\_012028, NC\_012029, NC\_012030, orange); 2<sup>nd</sup> annulus: SNP histograms, stacked freq bands 0.7-0.8, 0.8-0.9, 0.9-1.0; 3<sup>rd</sup> annulus: core (blue), flexible (orange), IS (red); 4<sup>th</sup> annulus: CRISPR associated (pink), *orc1/cdc6* (green), rRNA (purple); 5<sup>th</sup> annulus: CAI (yellow-blue), CBI (yellow-orange) heatmaps, deeper colour indicates more adapted; 6<sup>th</sup> annulus: read-depth by gsMapper reference mapping (red), FR-hit fragment recruitment (green), log scale y-axis; 7<sup>th</sup> annulus: GC skew,  $> 0$  (blue),  $< 0$  (red), y-axis is independent per replicon; 8<sup>th</sup>, 9<sup>th</sup> annulus: Contigs from Celera WGS or gsMapper *de novo* assembly of 8 million 454 reads; 10<sup>th</sup> annulus: “ADL-like 5<sup>th</sup> genome” fragments aligned to the tADL genome; Internal lines: shared HIR of  $\geq 99.8\%$  nucleotide identity and 5 kb length.

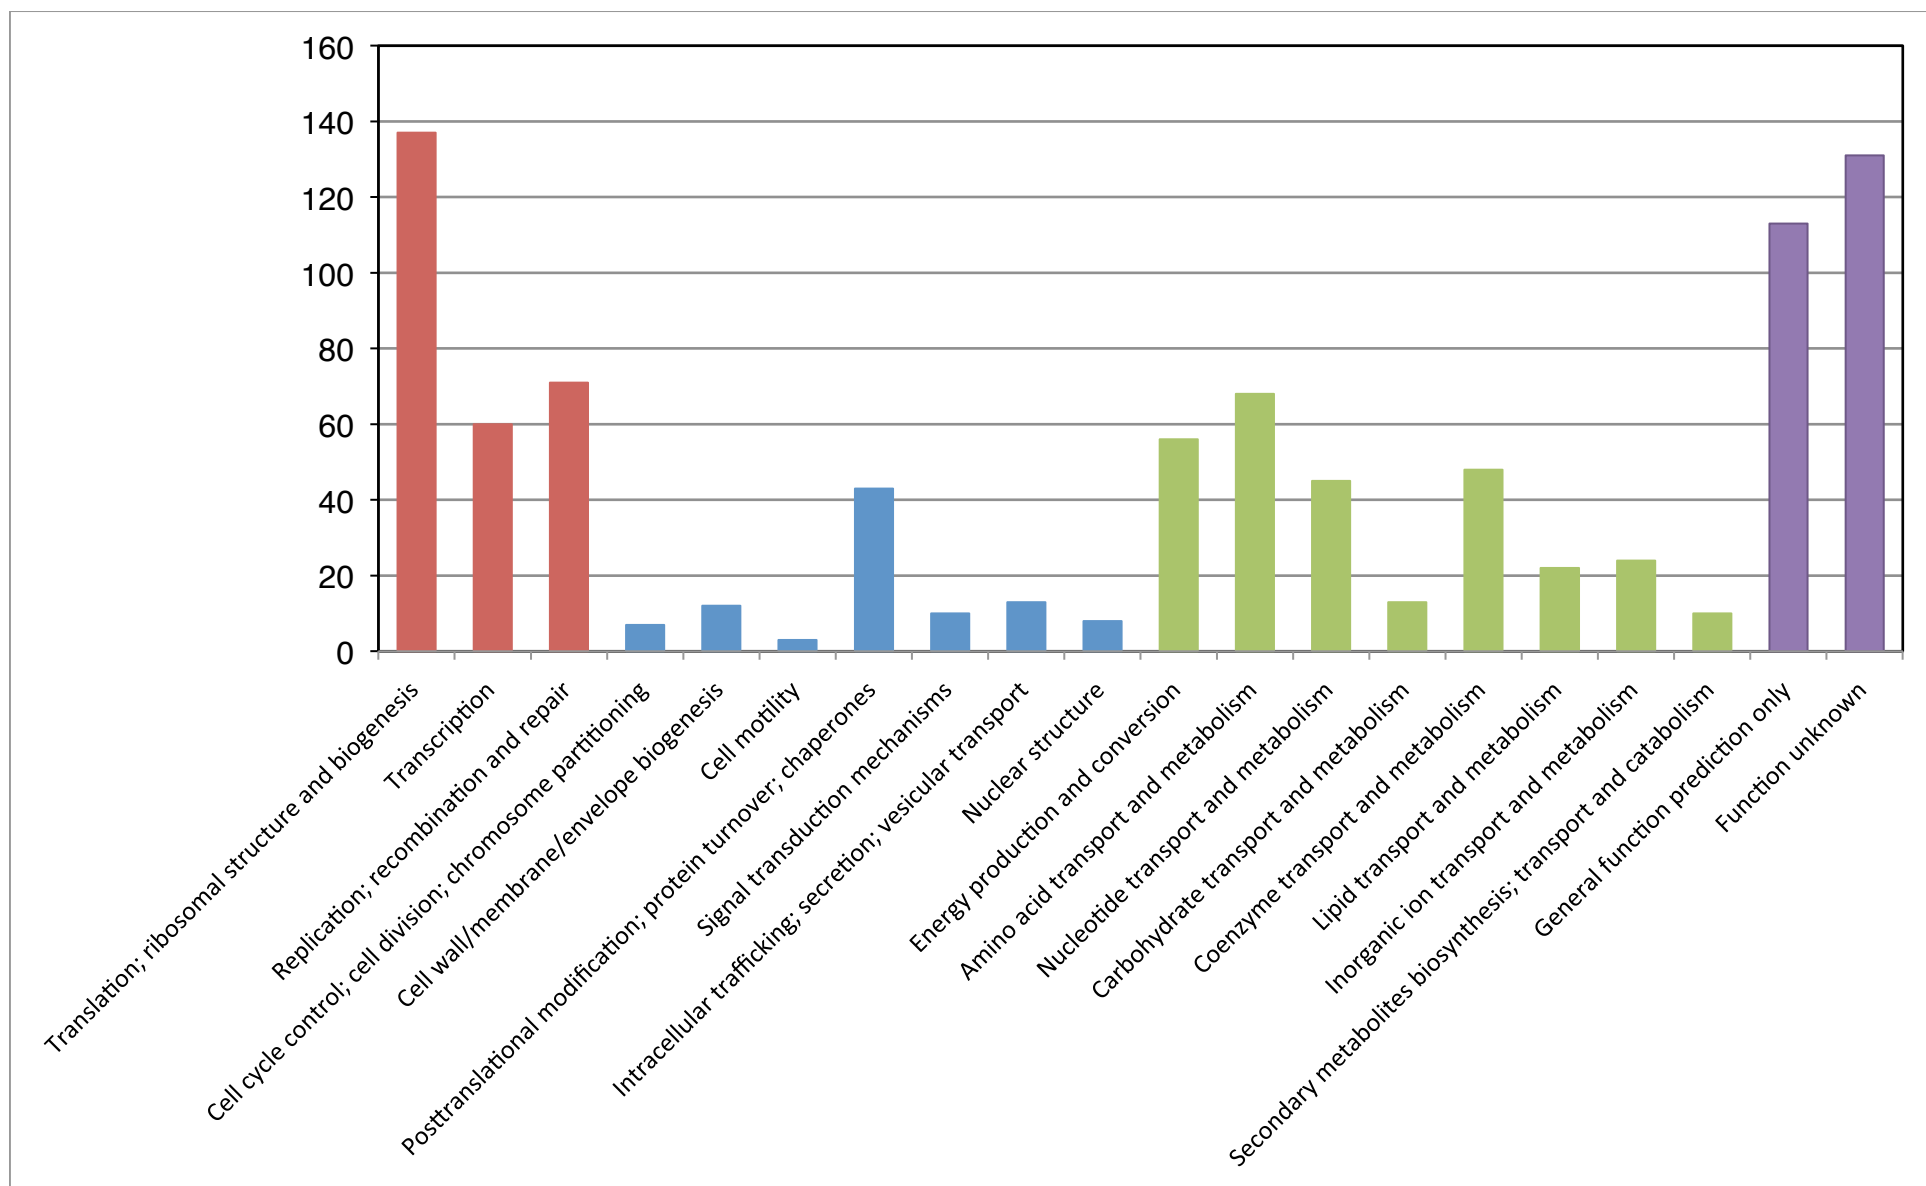

**Fig. S8.** ArCOG assignments of the core gene content. Core orthologous groups assigned to ArCOG functional categories. Bars are coloured by the four functional classes: Information storage and processing (red), Cellular processes and signalling (blue), Metabolism (green) and Poorly characterised (purple).

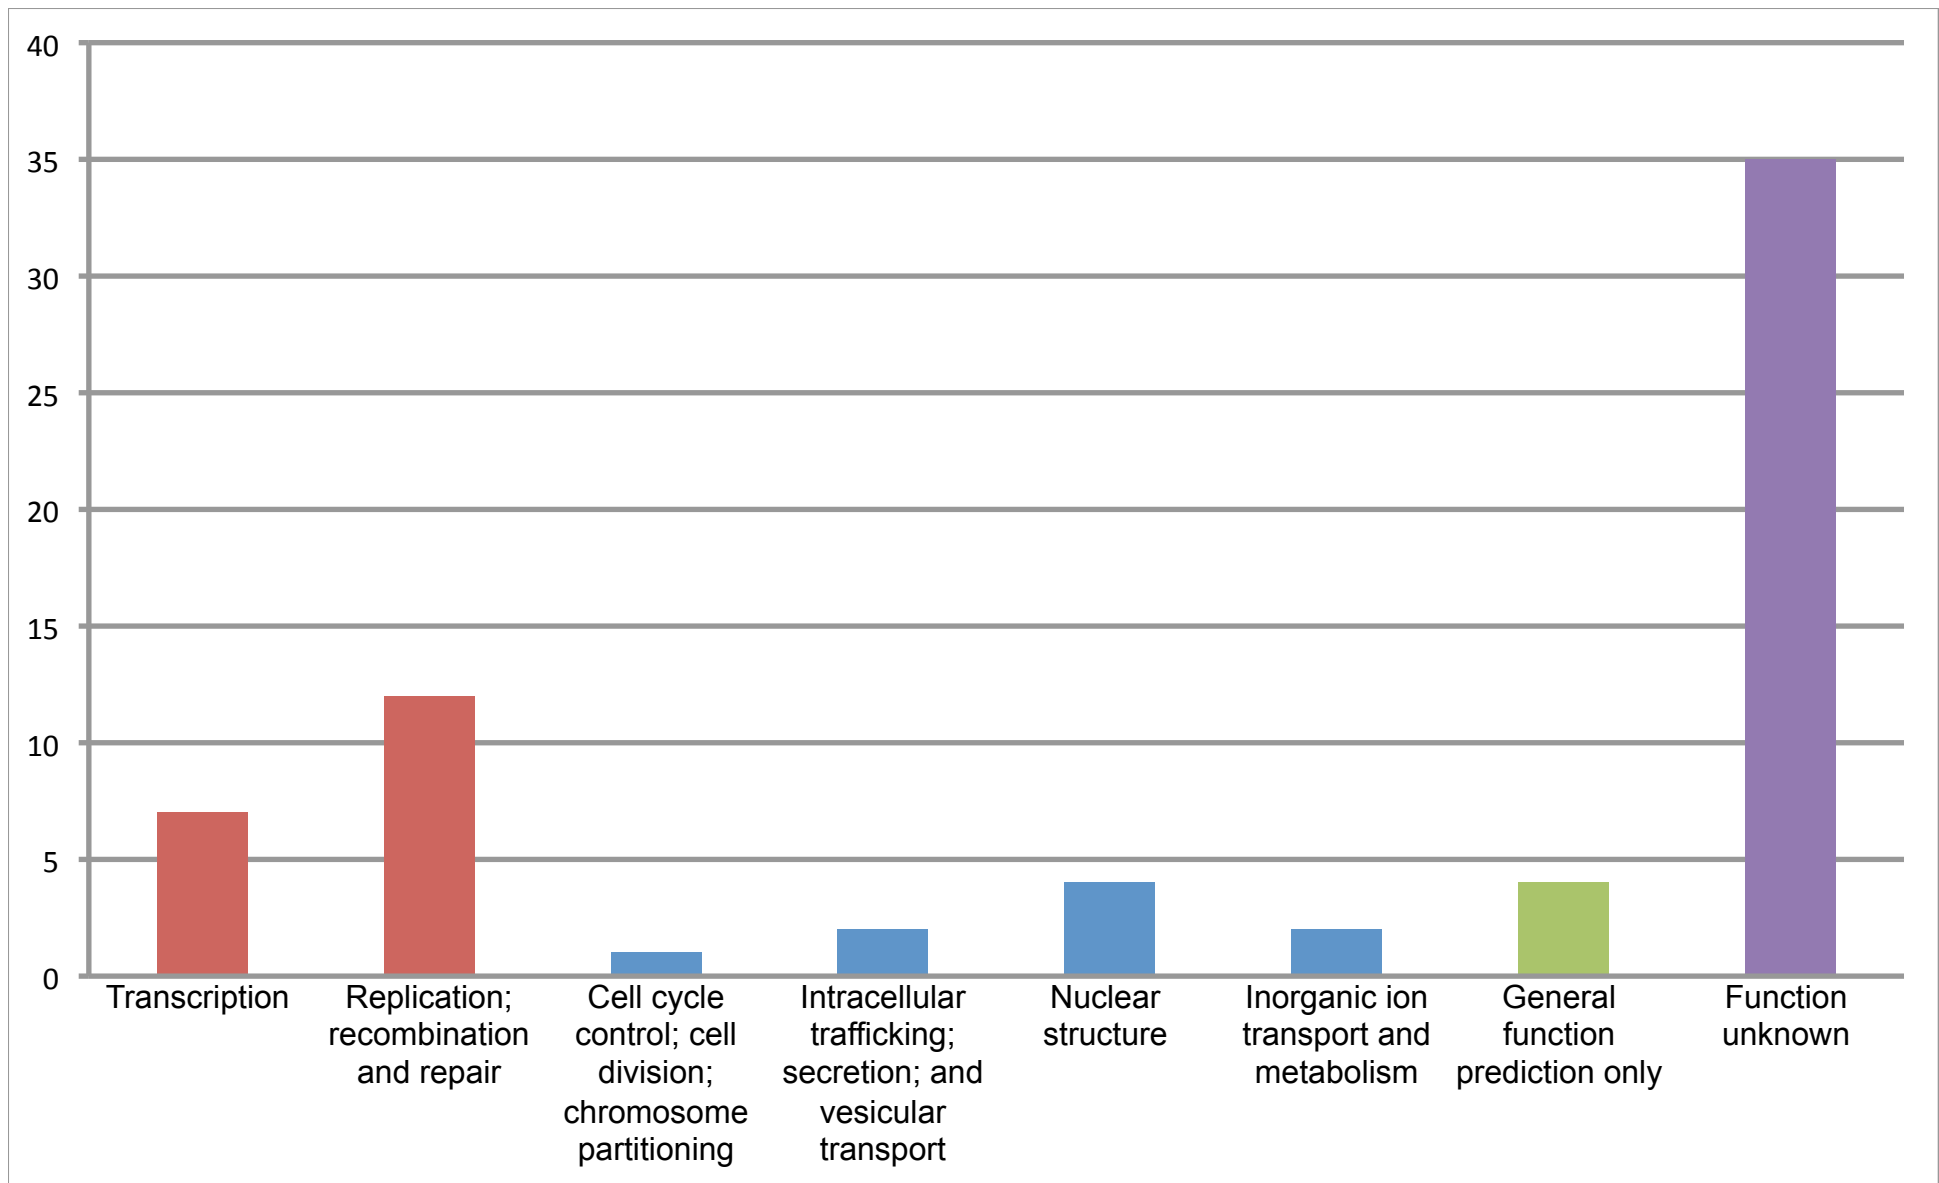

**Fig. S9.** ArCOG assignments of the non-core gene content. Non-core orthologous groups assigned to ArCOG functional categories. Bars are coloured by the four functional classes: Information storage and processing (red), Cellular processes and signalling (blue), Metabolism (green) and Poorly characterised (purple).

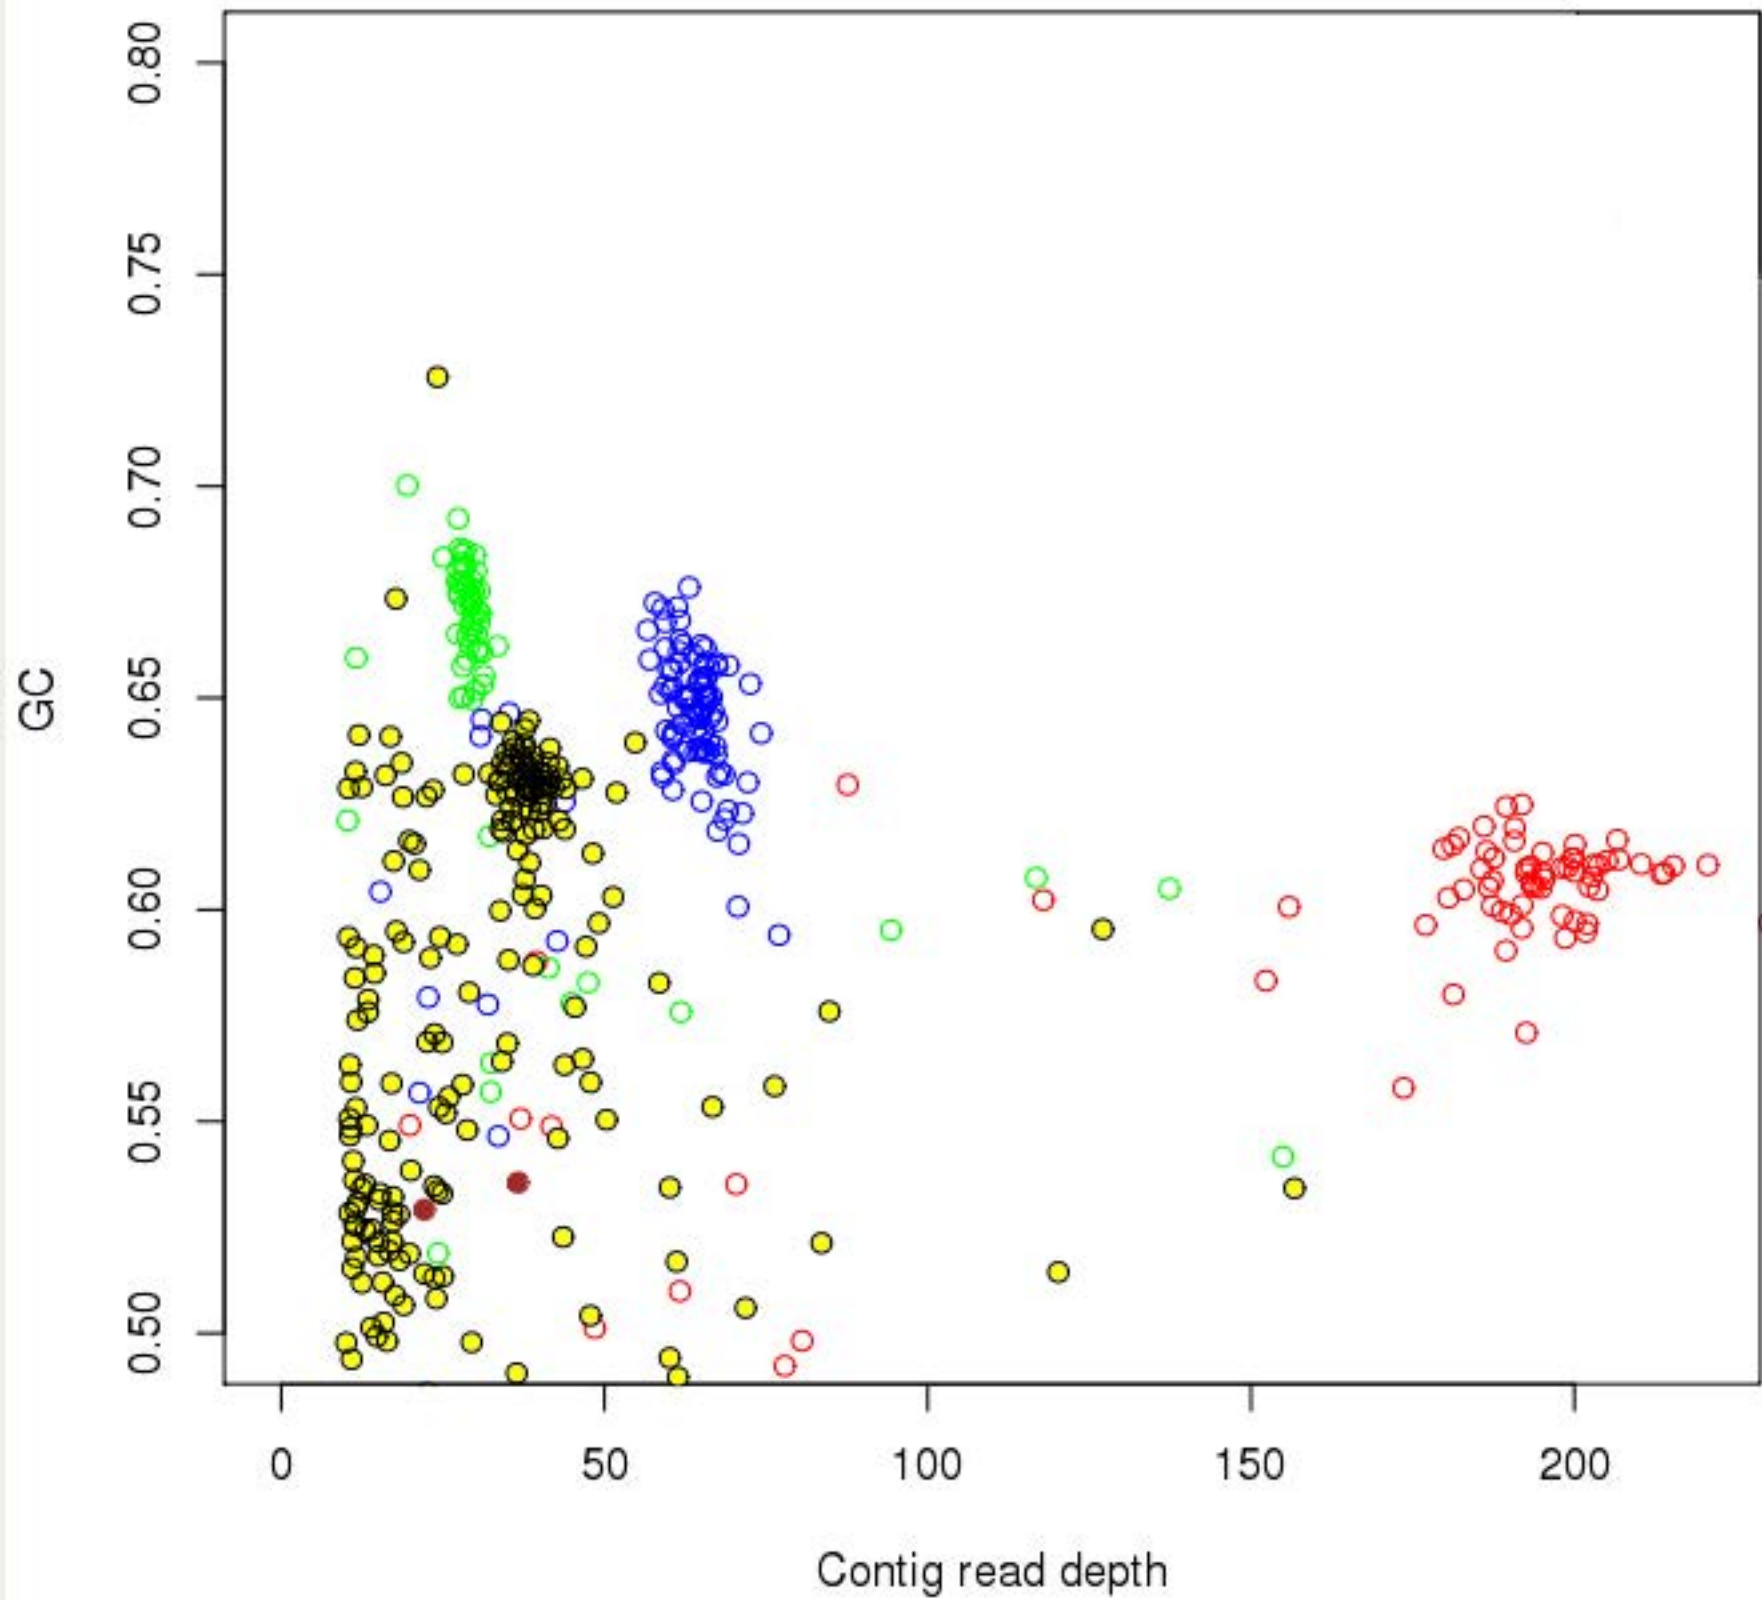

**Fig. S10.** Scatterplot of *de novo* assembly contigs in GC plus read-depth space. A 2-dimensional scatterplot of contigs longer than 15 kb from Celera WGS *de novo* assembly of all Roche 454 Titanium datasets, where axes are GC content and mean read-depth. Contigs possessing sufficient BLASTN scores (coverage > 90%, e-value <  $10^{-10}$ ) to the four DL genomes were labeled tADL (red), DL31 (blue), *Hl* (green), DL1 (brown). A dense cluster of unlabeled contigs (yellow) is visible with center (GC=0.63, RD=38.3) corresponding to the “tADL-like 5<sup>th</sup> genome”.



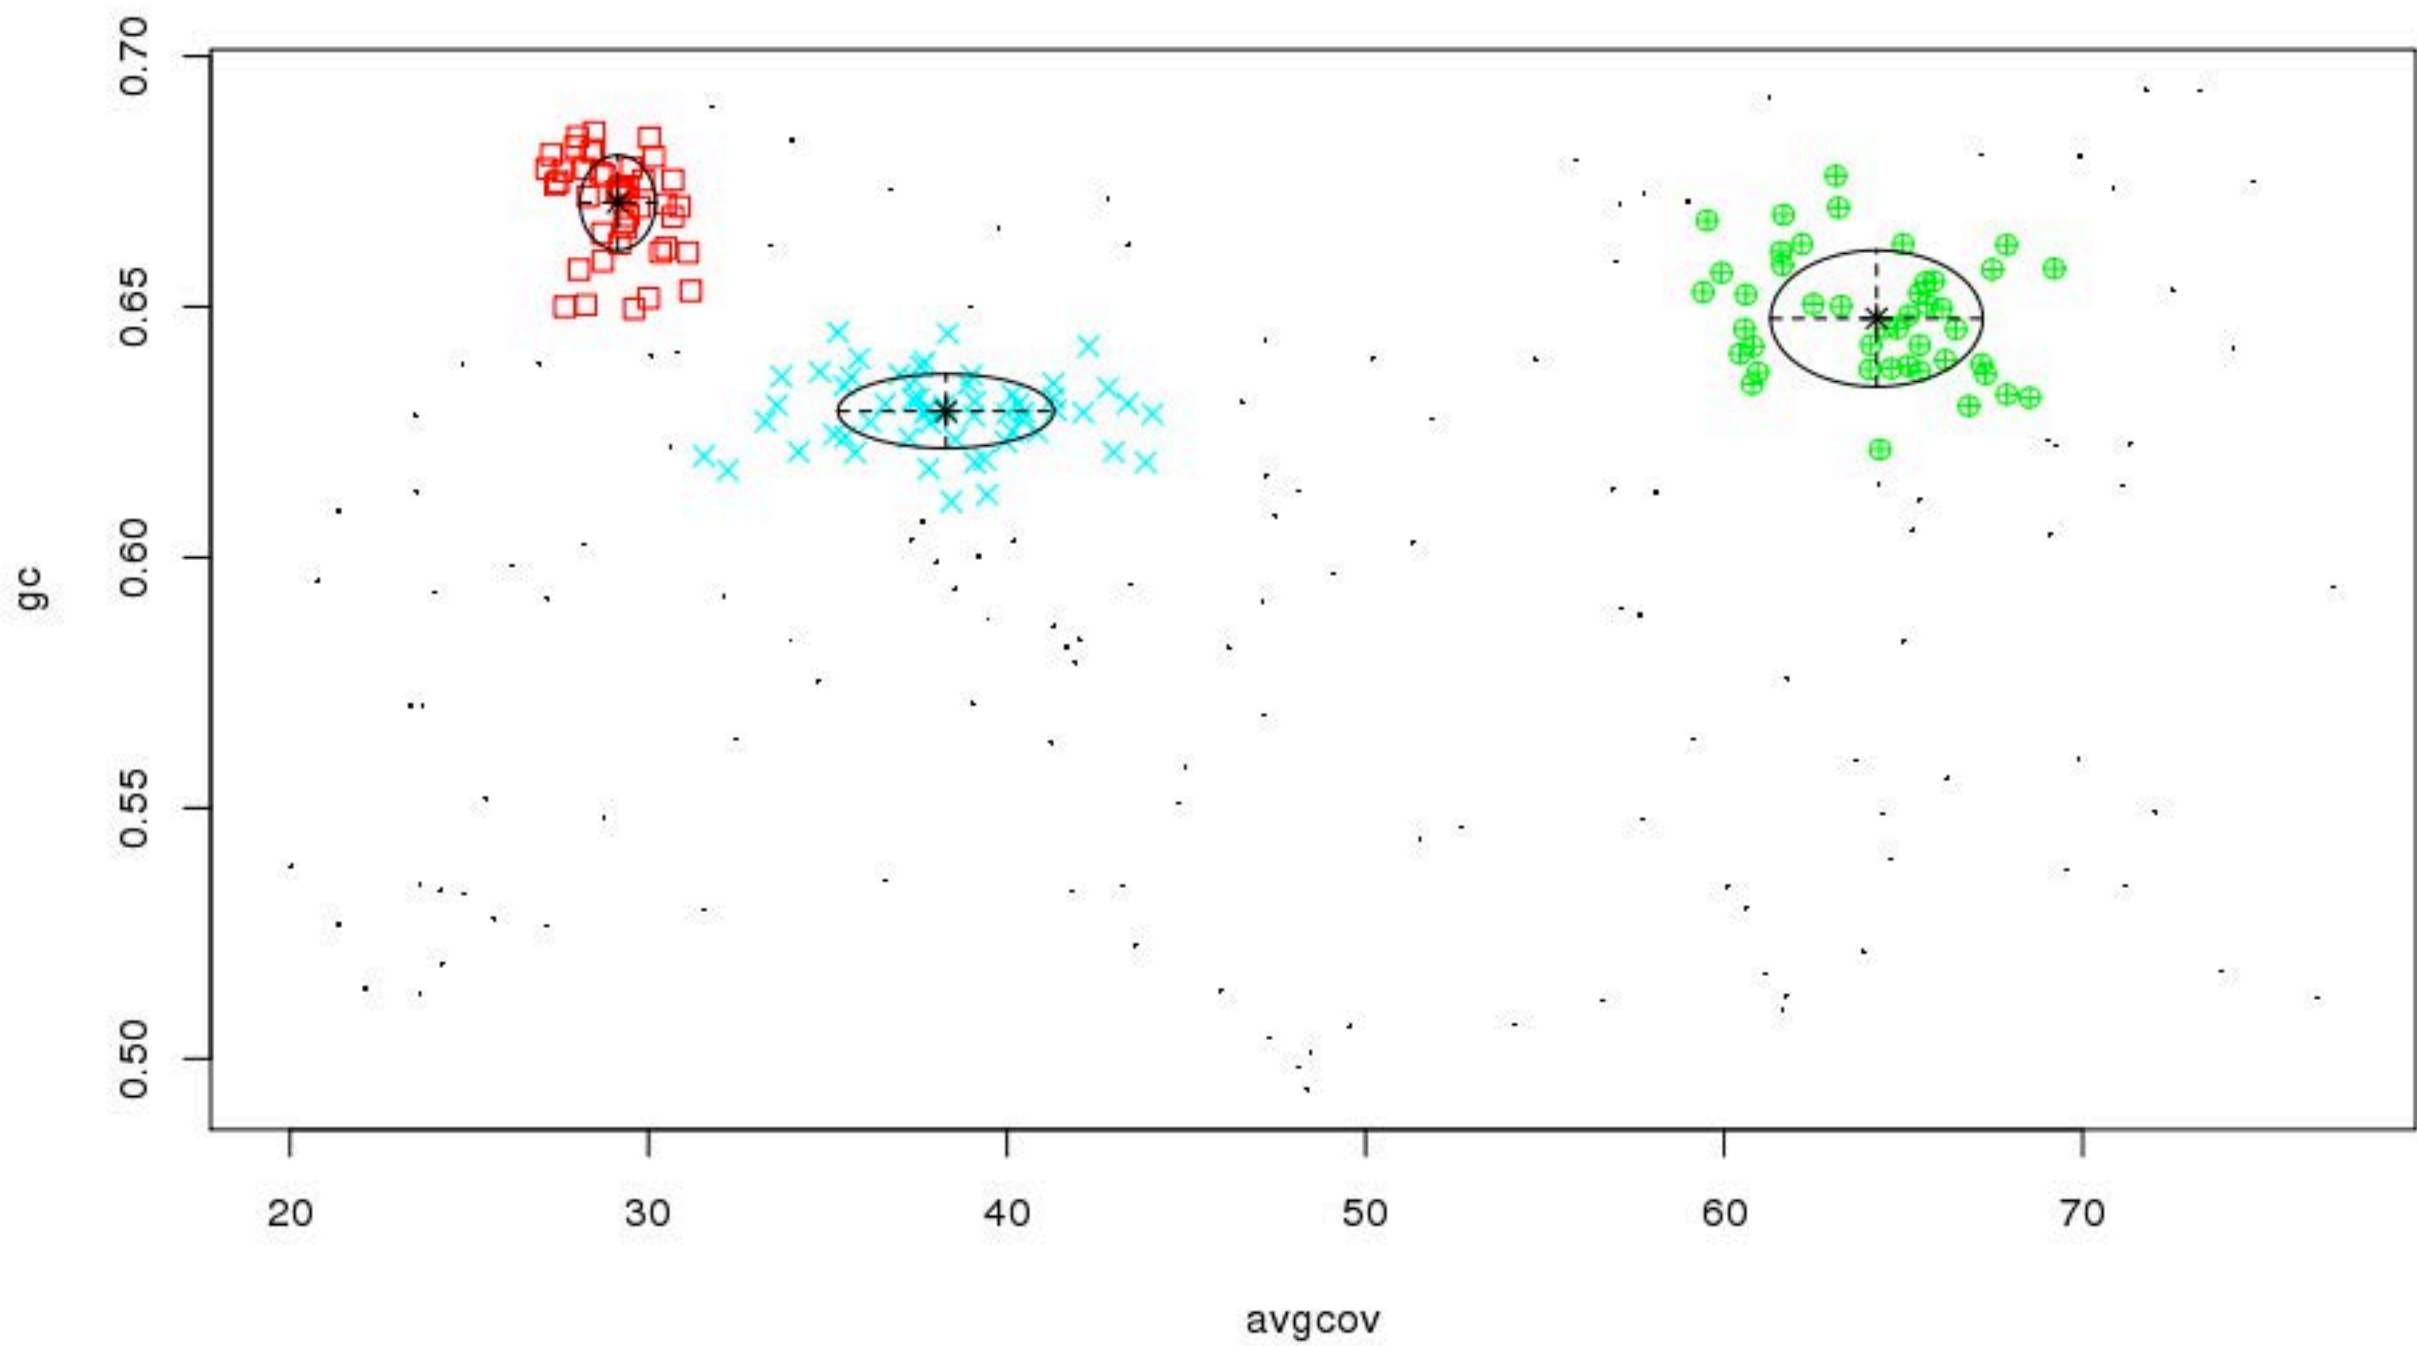

**Fig. S11.** Model based clustering of *de novo* assembly contigs in GC plus read-depth space. Contigs from Celera WGS *de novo* assembly of all Roche 454 Titanium samples were clustered by GC content and mean read-depth in R using Mclust model based clustering in the presence of Poisson noise (black specks). The space was limited to read-depths < 100. Three clusters were identified for DL31 (green circles), *Hl* (red squares) and the “tADL-related 5<sup>th</sup> genome” (cyan crosses).

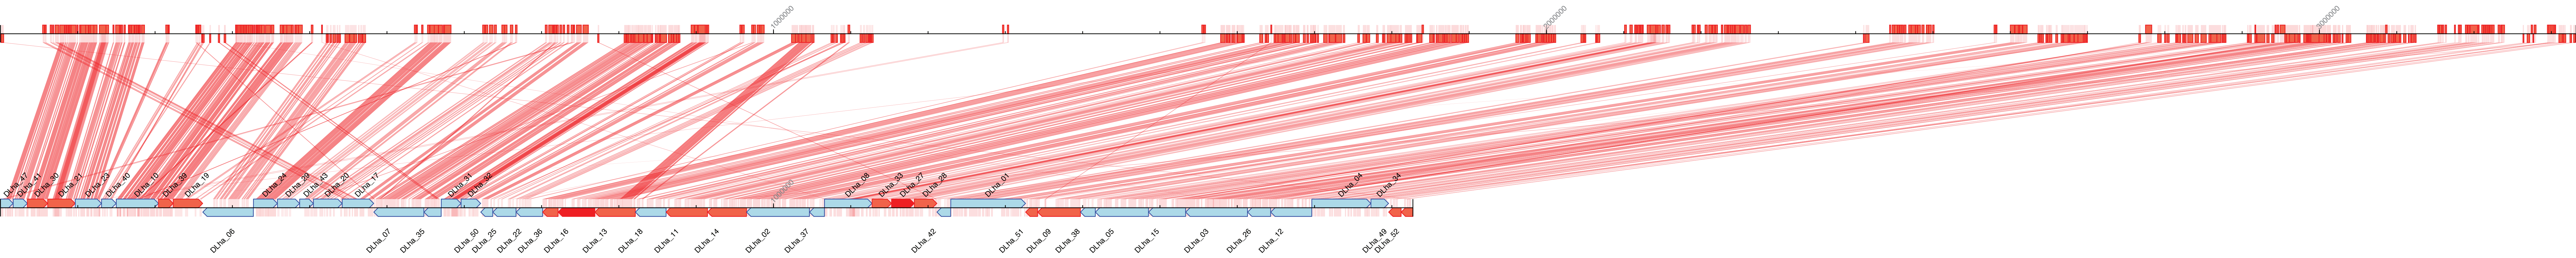

**Fig. S12.** Synteny plot of “tADL-related 5<sup>th</sup> genome” mapped to tADL. A synteny plot between the 52 contigs obtained from the *de novo* assembly identified as “tADL-related 5<sup>th</sup> genome”, and the tADL primary replicon was generated using CONTIGuator. Top line, tADL primary replicon; bottom line, “tADL-related 5<sup>th</sup> genome”. Overlapping contigs: light red, one side, dark red, both sides, blue, no overlap. Strandedness indicated by contig arrow.

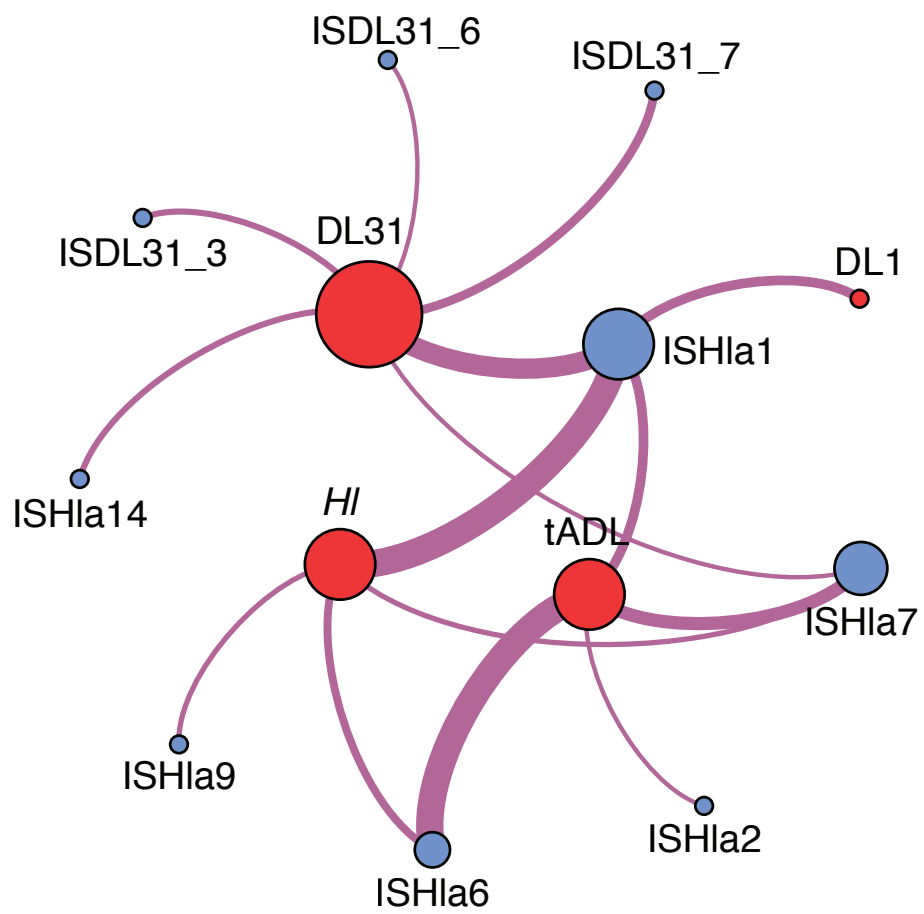

**Fig. S13.** Association networks for Deep Lake ISs. Bipartite association networks for ISs identified within the four DL haloarchaeal genomes, using Fruchterman-Reingold layout. ISs (blue nodes) and their containing genome (red nodes) where node radius scales linearly with weighted degree, and edge weights are proportional to frequency of IS occurrence.

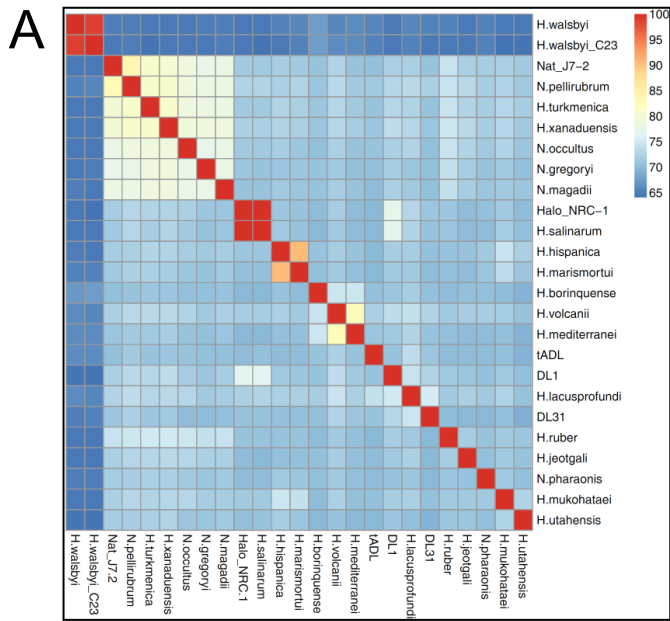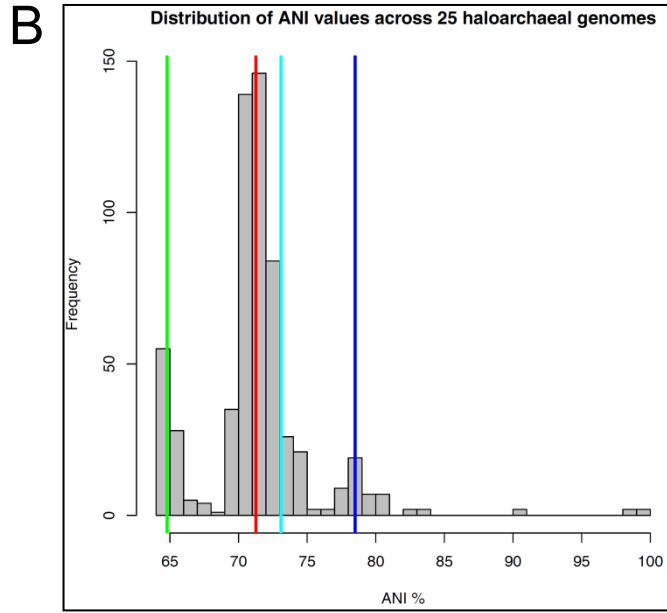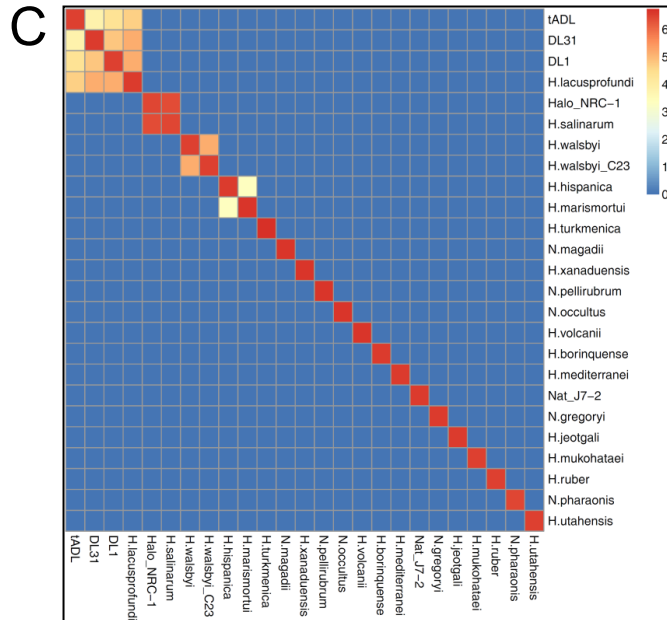

**Fig. S14.** ANI and HIR analysis of haloarchaeal genomes. Heatmap with rows and columns ordered by minimum variance for ANI (**A**), histogram of the distribution of ANI values (**B**), and heatmap with rows and columns ordered by minimum variance for extent of shared HIR (>99%, >2 kb) (**C**) between 25 completed haloarchaeal genomes. (**B**) median global ANI (red line); median ANI for Nat\_J7-2, *H.turkmenica*, *H.xanaduensis*, *N.pellirubrum*, *N.occultus*, *N.gregoryi*, *N.magadii* (blue line); median ANI for *H.walsbyi* strains (green line); median ANI for DL haloarchaea, tADL, DL31, *Hl* and DL1 (light blue line).



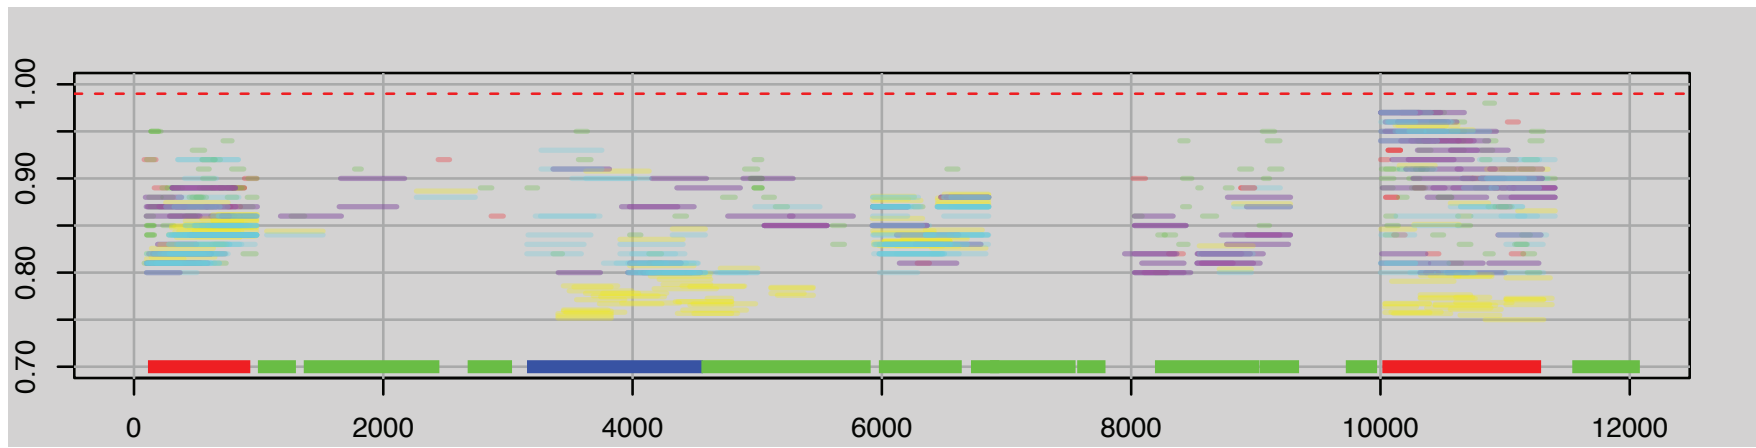

**Fig. S15.** HIR FR typical of metagenome data with matches from Chula Bay or Santa Pola. FR plot of 758 combined reads above 70% identity, 50% read coverage mapped from 6 high salinity saltern metagenomes to an HIR (13.3 kb, 99.9% identity) shared between DL31:Contig114 (664513..677829) and HI:NC\_012028 C (329458..342775). Reads are coloured by metagenome source: Chula Bay SRR023631 (red), SRR027043 (green) and Santa Pola SRR062267 (blue), SRR316684 (yellow), SRR328982 (magenta), SRR328983 (light blue). The red dashed line indicates 99% identity threshold, which no read exceeded and the thick line segments at the bottom represent genes colored by broad annotation categories: transposase (red), hypothetical (green), non-hypothetical (blue). Reads tend to pile up predominately on IS associated genes such as transposases. A bias toward FR in coding regions and away from intergenic regions is also apparent.

**Table S1. Metagenome sequencing summary.**

| <b>Library name</b> | <b>Technology</b> | <b>Depth (m)</b> | <b>Filter size (<math>\mu\text{m}</math>)</b> | <b>Raw reads</b> |
|---------------------|-------------------|------------------|-----------------------------------------------|------------------|
| HTAA                | 454 Titanium      | 5                | 0.1                                           | 1,007,472        |
| HTAF                | 454 Titanium      | 13               | 0.1                                           | 1,158,857        |
| HTAC                | 454 Titanium      | 24               | 0.1                                           | 1,108,448        |
| HTAB                | 454 Titanium      | 24               | 0.8                                           | 1,063,876        |
| GWTB                | 454 Titanium      | 24               | 3.0                                           | 931,207          |
| HTSY                | 454 Titanium      | 36               | pooled                                        | 1,363,684        |
| HWGG                | 454 Titanium      | 36               | pooled                                        | 1,423,784        |
| GXFW                | Solexa Illumina   | 24               | 3.0                                           | 45,601,760       |

**Table S2. Genome characteristics of tADL, DL31, *Hl* and DL1.**

| Name      | Year of isolation                                           | Pseudonym in Refseq          | Replicon Count <sup>1</sup> | Size (bp) | Genes | 16S rRNA genes | Coding genes | GC (%) | Coding bases (%) |
|-----------|-------------------------------------------------------------|------------------------------|-----------------------------|-----------|-------|----------------|--------------|--------|------------------|
| tADL      | water sample Dec 2006, isolation 2007                       | halophilic archaeon True-ADL | 1                           | 3332022   | 3520  | 2              | 3465         | 58.9   | 85.9             |
| <i>Hl</i> | date of water sampling not stated – paper published in 1988 | Halorubrum lacusprofundi     | 3                           | 3692576   | 3725  | 3              | 3665         | 64     | 84.5             |
| DL31      | water sample Dec 2006, isolation 2009                       | halophilic archaeon DL31     | 3                           | 3643158   | 3788  | 2              | 3737         | 62.4   | 83.2             |
| DL1       | water sample Dec 2006, isolation 2009                       | Halobacterium sp. DL         | 2                           | 3162560   | 3367  | 1              | 3317         | 66.4   | 88.2             |

1: Replicons “assembled, autonomous circular genetic elements” were defined during the assembly process.

**Table S3. SSU rRNA gene similarity matrix for tADL, DL31, *Hl* and DL1.**

| <b>Dissimilarity</b> | tADL   | DL31   | <i>Hl</i> | DL1    | <b>Similarity</b> | tADL   | DL31   | <i>Hl</i> | DL1    |
|----------------------|--------|--------|-----------|--------|-------------------|--------|--------|-----------|--------|
| tADL                 | 0      | 0.1535 | 0.1347    | 0.171  | tADL              | 1      | 0.8465 | 0.8653    | 0.829  |
| DL31                 | 0.1535 | 0      | 0.1559    | 0.1563 | DL31              | 0.8465 | 1      | 0.8441    | 0.8437 |
| <i>Hl</i>            | 0.1347 | 0.1559 | 0         | 0.1438 | <i>Hl</i>         | 0.8653 | 0.8441 | 1         | 0.8562 |
| DL1                  | 0.171  | 0.1563 | 0.1438    | 0      | DL1               | 0.829  | 0.8437 | 0.8562    | 1      |

**Table S4. Abundance of taxa calculated from SSU rRNA gene pyrotag sequencing data.**

| <b>Organism</b>                                         | <b>5 m</b> | <b>13 m</b> | <b>24 m</b> | <b>36 m</b> | <b>Average</b> |
|---------------------------------------------------------|------------|-------------|-------------|-------------|----------------|
| <b>tADL</b>                                             | 48.62      | 44.47       | 47.97       | 32.87       | 43.48          |
| <b>DL31</b>                                             | 19.29      | 18.03       | 15.29       | 20.01       | 18.16          |
| Dunaliella chloroplast100                               | 7.00       | 9.13        | 11.95       | 14.46       | 10.64          |
| <i>Halorubrum lacusprofundi</i>                         | 8.99       | 10.28       | 9.82        | 10.43       | 9.88           |
| DL29-clone                                              | 1.82       | 1.84        | 1.93        | 2.53        | 2.03           |
| <i>Halospina denitrificans</i>                          | 2.29       | 2.39        | 1.28        | 1.35        | 1.83           |
| <i>Dunaliella</i> -18S                                  | 1.36       | 1.44        | 1.57        | 1.75        | 1.53           |
| Halobacteriaceae_cloneGX3                               | 0.96       | 0.96        | 0.84        | 0.60        | 0.84           |
| <i>Halomonas subglaciescola</i>                         | 0.84       | 0.85        | 0.44        | 1.15        | 0.82           |
| Bacteroidetes-Sphingobacteriales-ELB25-178              | 0.37       | 0.59        | 0.31        | 1.50        | 0.69           |
| <i>Natronoarchaeum mannanilyticum</i>                   | 0.69       | 0.74        | 0.61        | 0.42        | 0.62           |
| Gammaproteobacteria_Ectothiorhodospiraceae_cloneSINI729 | 0.55       | 0.71        | 0.42        | 0.70        | 0.60           |
| Gammaproteobacteria_Salinisphaera_sp                    | 0.48       | 0.99        | 0.52        | 0.35        | 0.59           |
| Firmicute-Haloanaerobium_cloneARDBACWH2                 | 0.33       | 0.84        | 0.61        | 0.47        | 0.56           |
| <i>Dunaliella</i> chloroplast 97                        | 0.33       | 0.38        | 0.47        | 0.49        | 0.42           |
| Firmicute-Haloanaerobium                                | 0.22       | 0.32        | 0.31        | 0.38        | 0.31           |
| <b>DL1</b>                                              | 0.34       | 0.41        | 0.29        | 0.16        | 0.30           |
| <i>Psychroflexus torquis</i>                            | 0.26       | 0.24        | 0.15        | 0.46        | 0.28           |
| Firmicute-Haloanaerobacter_lacunarum                    | 0.28       | 0.42        | 0.33        | 0.08        | 0.28           |
| ADL31_97                                                | 0.30       | 0.24        | 0.27        | 0.27        | 0.27           |
| <i>Other</i>                                            | 4.67       | 4.73        | 4.61        | 9.57        | 5.90           |

<sup>1</sup> Relative abundance calculated from SSU rRNA gene pyrotag sequencing data of the 20 most abundant operational taxonomic units across all depths in DL.

**Table S5. Insertion sequences in tADL, DL31, *HI* and DL1 identified in the ISSaga database.**

| IS name    | Template ORF | IS Family   | ISFinder search <sup>2</sup> |                  |          | Frequency <sup>3</sup> |      |     |      |           |       |
|------------|--------------|-------------|------------------------------|------------------|----------|------------------------|------|-----|------|-----------|-------|
|            |              |             | IS Group                     | Closest relative | Identity | Bitscore               | tADL | DL1 | DL31 | <i>HI</i> | Total |
| ISHla1     | orf00115     | ISH3        |                              | H.lacus ISHla1   | 99       | 2752                   | 11   | 11  | 23   | 31        | 76    |
| ISHla6     | orf00119     | IS5         |                              | H.lacus ISHla6   | 100      | 2119                   | 31   | 0   | 1    | 9         | 41    |
| ISHla7     | orf00143     | ISNYC       | ISH6                         | H.salin ISH6     | 88       | 1505                   | 15   | 3   | 5    | 6         | 29    |
| ISDL31_7   | orf00149     | IS66        | ISBst12                      | H.wals ISHwa10   | 86       | 1043                   | 0    | 2   | 10   | 0         | 12    |
| ISHlac14   | orf00153     | ISH3        |                              | H.salin ISH20A   | 90       | 1493                   | 0    | 1   | 7    | 3         | 11    |
| ISHla2     | orf00157     | IS5         | ISH1                         | H.lacus ISHla2   | 100      | 2365                   | 5    | 1   | 1    | 3         | 10    |
| ISHla8     | orf00207     | IS4         | ISH8                         | H.sp NRC-1 ISH8B | 92       | 1901                   | 0    | 2   | 4    | 2         | 8     |
| ISDL31_3   | orf_ISf_6    | IS6         |                              | H.sp NRC-1 ISH29 | 82       | 260                    | 0    | 0   | 7    | 0         | 7     |
| ISHla9     | orf00175     | ISH3        |                              | H.wals ISHwa13   | 81       | 509                    | 0    | 0   | 1    | 6         | 7     |
| ISDL31_6   | orf00668     | IS66        | ISBst12                      | H.wals ISHwa10   | 86       | 932                    | 0    | 0   | 5    | 0         | 5     |
| ISDL31_2p  | orf00872     | -           |                              |                  |          |                        | 0    | 0   | 4    | 0         | 4     |
| ISHlac11   | orf00776     | IS200/IS605 | IS1341                       | N.phara ISNph17  | 98       | 92                     | 1    | 0   | 0    | 3         | 4     |
| ISHlac15   | orf_ISf_5    | IS6         |                              | N.phara ISNph1   | 96       | 50                     | 0    | 0   | 1    | 3         | 4     |
| ISHlac10   | orf00355     | IS200/IS605 | IS1341                       | N.phara ISNph18  | 97       | 62                     | 0    | 0   | 0    | 3         | 3     |
| ISDL31_11  | orf00661     | IS200/IS605 |                              | H.sp NRC-1 ISH12 | 82       | 149                    | 0    | 1   | 0    | 2         | 3     |
| ISNph18    | orf02643     | IS200/IS605 | IS1341                       | N.phara ISNph18  | 93       | 50                     | 0    | 0   | 3    | 0         | 3     |
| ISDL31_9   | orf00945     | IS5         | ISH1                         | H.utah           | 91       | 1211                   | 0    | 3   | 0    | 0         | 3     |
| ISHla3     | orf01135     | IS5         | ISH1                         | H.lacus ISHla3   | 100      | 1842                   | 0    | 0   | 1    | 2         | 3     |
| ISDL31_10  | orf01662     | IS200/IS605 |                              | N.phara ISNph5   | 97       | 60                     | 0    | 2   | 0    | 0         | 2     |
| ISHlac12   | orf00692     | -           |                              |                  |          |                        | 0    | 0   | 0    | 1         | 1     |
| ISHlac13   | orf00739     | -           |                              |                  |          |                        | 0    | 0   | 0    | 1         | 1     |
| ISDL31_1   | orf04615     | IS1595      | ISH4                         | H.sp ISH4        | 86       | 920                    | 0    | 0   | 1    | 0         | 1     |
| ISHla4     | orf00615     | IS5         | ISH1                         | H.lacus ISHla4   | 100      | 3576                   | 0    | 0   | 0    | 1         | 1     |
| ISDL31_5   | orf_ISf_1    | IS6         |                              | H.maris ISH15    | 86       | 603                    | 0    | 0   | 1    | 0         | 1     |
| ISHla5     | orf00210     | ISH3        |                              | H.lacus ISHla5   | 100      | 2769                   | 0    | 0   | 0    | 1         | 1     |
| ISDL31_8_p | orf02573     | ISNYC       | ISH6                         | H.salin ISH6     | 87       | 1417                   | 0    | 0   | 1    | 0         | 1     |

<sup>1</sup> Insertion sequences identified and manually annotated in ISSaga from the four DL genomes. ISs that have been previously identified (red); newly defined ISs given identifying names (IS name) following the advised nomenclature (black).

<sup>2</sup> ISFinder public database of ISs nearest relative identify is shown if the IS has been previously discovered (>95% similarity).

<sup>3</sup> Frequencies within each DL genome and total occurrence across the 4 DL genomes.





|           |         |   |   |   |       |   |   |            |     |     |     |     |     |    |            |            |                                 |            |   |   |         |      |  |                                                                                       |
|-----------|---------|---|---|---|-------|---|---|------------|-----|-----|-----|-----|-----|----|------------|------------|---------------------------------|------------|---|---|---------|------|--|---------------------------------------------------------------------------------------|
| Contig115 | 265011  | T | C | C | 0.935 | T | F | Halar_0979 | 1   | 201 | 0   | 13  | 215 | gt | Halar_0979 | 2507078884 | gi 345004264 ref YP_004807117.1 | arCOG02267 | 3 | P |         |      |  | Phosphate/sulphate permease                                                           |
| Contig115 | 281311  | T | C | C | 0.92  | T | T | Halar_0998 | 0   | 287 | 0   | 25  | 312 | ct | Halar_0998 | 2507078903 | gi 345004282 ref YP_004807135.1 | arCOG06322 | 3 | E | COG0506 | E    |  | Proline dehydrogenase                                                                 |
| Contig115 | 285271  | C | T | T | 0.964 | T | F | Halar_1002 | 0   | 9   | 0   | 238 | 247 | ac | Halar_1002 | 2507078907 | gi 345004286 ref YP_004807139.1 | arCOG00349 | 3 | C | COG1141 | C    |  | Ferredoxin                                                                            |
| Contig115 | 286364  | A | G | G | 0.903 | T | T | Halar_1003 | 19  | 0   | 176 | 0   | 195 | aa | Halar_1003 | 2507078908 | gi 345004287 ref YP_004807140.1 | arCOG00872 | 1 | L | COG1111 | L    |  | ERCC4-like helicase                                                                   |
| Contig115 | 286477  | C | T | T | 0.911 | T | F | Halar_1003 | 0   | 14  | 0   | 143 | 157 | gc | Halar_1003 | 2507078908 | gi 345004287 ref YP_004807140.1 | arCOG00872 | 1 | L | COG1111 | L    |  | ERCC4-like helicase                                                                   |
| Contig115 | 286511  | A | G | G | 0.974 | T | T | Halar_1003 | 4   | 0   | 150 | 0   | 154 | ca | Halar_1003 | 2507078908 | gi 345004287 ref YP_004807140.1 | arCOG00872 | 1 | L | COG1111 | L    |  | ERCC4-like helicase                                                                   |
| Contig115 | 286523  | T | C | C | 0.954 | T | T | Halar_1003 | 0   | 165 | 0   | 8   | 173 | tt | Halar_1003 | 2507078908 | gi 345004287 ref YP_004807140.1 | arCOG00872 | 1 | L | COG1111 | L    |  | ERCC4-like helicase                                                                   |
| Contig115 | 286682  | C | A | A | 0.941 | T | T | Halar_1003 | 239 | 15  | 0   | 0   | 254 | cc | Halar_1003 | 2507078908 | gi 345004287 ref YP_004807140.1 | arCOG00872 | 1 | L | COG1111 | L    |  | ERCC4-like helicase                                                                   |
| Contig115 | 349990  | A | G | G | 0.952 | T | T | Halar_1071 | 13  | 0   | 256 | 0   | 269 | ca | Halar_1071 | 2507078977 | gi 345004349 ref YP_004807202.1 | arCOG01301 | 2 | O | COG0492 | O    |  | Thioredoxin reductase                                                                 |
| Contig115 | 351625  | T | G | G | 0.982 | T | F | Halar_1074 | 0   | 0   | 222 | 4   | 226 | at | Halar_1074 | 2507078980 | gi 345004352 ref YP_004807205.1 | arCOG03873 | 4 | S | COG2855 | S    |  | Predicted membrane protein                                                            |
| Contig115 | 383034  | C | T | T | 0.988 | T | F | Halar_1102 | 0   | 4   | 0   | 337 | 341 | cc | Halar_1102 | 2507079008 | gi 345004380 ref YP_004807233.1 | arCOG00373 | 1 | L | COG1196 | D    |  | DNA sulfur modification protein DndD,ATPase                                           |
| Contig115 | 474990  | A | G | G | 1     | T | F | Halar_1196 | 0   | 0   | 320 | 0   | 320 | aa |            |            |                                 |            |   |   |         |      |  |                                                                                       |
| Contig115 | 487055  | G | T | T | 0.913 | T | F | Halar_1209 | 0   | 0   | 17  | 179 | 196 | ag | Halar_1209 | 2507079115 | gi 345004481 ref YP_004807334.1 | arCOG02092 | 3 | E | COG0119 | E    |  | Isopropylmalate/homocitrate/citramalate synthase                                      |
| Contig115 | 560597  | A | G | G | 0.912 | T | T | Halar_1281 | 22  | 0   | 227 | 0   | 249 | ca | Halar_1281 | 2507079187 | gi 345004548 ref YP_004807401.1 | arCOG00184 | 3 | E | COG4608 | E    |  | ABC-type oligopeptide transport system,ATPase component                               |
| Contig115 | 560728  | C | T | T | 0.935 | T | F | Halar_1281 | 0   | 16  | 0   | 231 | 247 | gc | Halar_1281 | 2507079187 | gi 345004548 ref YP_004807401.1 | arCOG00184 | 3 | E | COG4608 | E    |  | ABC-type oligopeptide transport system,ATPase component                               |
| Contig115 | 560744  | G | A | A | 0.939 | T | T | Halar_1281 | 229 | 0   | 15  | 0   | 244 | gg | Halar_1281 | 2507079187 | gi 345004548 ref YP_004807401.1 | arCOG00184 | 3 | E | COG4608 | E    |  | ABC-type oligopeptide transport system,ATPase component                               |
| Contig115 | 667430  | G | A | A | 0.933 | T | F | Halar_1394 | 277 | 0   | 20  | 0   | 297 | gg | Halar_1394 | 2507079301 | gi 345004658 ref YP_004807511.1 | arCOG01808 | 2 | N | COG2064 | NU   |  | Flp pilus assembly protein TadC                                                       |
| Contig115 | 746010  | A | G | G | 0.98  | F | F |            | 5   | 0   | 246 | 0   | 251 | ca |            |            |                                 |            |   |   |         |      |  |                                                                                       |
| Contig115 | 821561  | T | G | G | 0.939 | T | T | Halar_1558 | 0   | 0   | 307 | 20  | 327 | ct | Halar_1558 | 2507079467 | gi 345004810 ref YP_004807663.1 | arCOG01722 | 1 | J | COG0099 | J    |  | Ribosomal protein S13                                                                 |
| Contig115 | 851612  | A | G | G | 0.906 | T | F | Halar_1593 | 28  | 0   | 271 | 0   | 299 | ga | Halar_1593 | 2507079504 | gi 345004844 ref YP_004807697.1 | arCOG01331 | 2 | O | COG0501 | O    |  | Zn-dependent protease with chaperone function                                         |
| Contig115 | 903759  | C | T | T | 0.923 | T | T | Halar_1644 | 0   | 27  | 0   | 322 | 349 | ac | Halar_1644 | 2507079555 | gi 345004889 ref YP_004807742.1 | arCOG08231 | 4 | S |         |      |  | Uncharacterized conserved protein                                                     |
| Contig115 | 915519  | T | C | C | 0.987 | T | F | Halar_1654 | 1   | 311 | 0   | 3   | 315 | gt | Halar_1654 | 2507079566 | gi 345004899 ref YP_004807752.1 | arCOG10342 | 4 | R |         |      |  | Ferritin-like superfamily protein                                                     |
| Contig115 | 1029727 | G | A | A | 0.917 | T | T | Halar_1764 | 165 | 0   | 15  | 0   | 180 | cg | Halar_1764 | 2507079682 | gi 345005001 ref YP_004807854.1 | arCOG00134 | 3 | G | COG0477 | GEPR |  | Permease of the major facilitator superfamily                                         |
| Contig115 | 1030031 | A | G | G | 0.974 | T | F | Halar_1764 | 6   | 0   | 229 | 0   | 235 | ca | Halar_1764 | 2507079682 | gi 345005001 ref YP_004807854.1 | arCOG00134 | 3 | G | COG0477 | GEPR |  | Permease of the major facilitator superfamily                                         |
| Contig115 | 1030042 | G | A | A | 0.922 | T | T | Halar_1764 | 200 | 0   | 17  | 0   | 217 | ag | Halar_1764 | 2507079682 | gi 345005001 ref YP_004807854.1 | arCOG00134 | 3 | G | COG0477 | GEPR |  | Permease of the major facilitator superfamily                                         |
| Contig115 | 1030134 | C | T | T | 0.941 | T | F | Halar_1765 | 0   | 11  | 0   | 176 | 187 | ac | Halar_1765 | 2507079683 | gi 345005002 ref YP_004807855.1 | arCOG04458 | 4 | R | COG2457 | S    |  | Uncharacterized protein of DIM6/NTAB family                                           |
| Contig115 | 1030207 | C | T | T | 0.941 | T | F | Halar_1765 | 0   | 16  | 0   | 254 | 270 | tc | Halar_1765 | 2507079683 | gi 345005002 ref YP_004807855.1 | arCOG04458 | 4 | R | COG2457 | S    |  | Uncharacterized protein of DIM6/NTAB family                                           |
| Contig115 | 1030376 | T | C | C | 0.93  | T | T | Halar_1765 | 1   | 199 | 0   | 14  | 214 | ct | Halar_1765 | 2507079683 | gi 345005002 ref YP_004807855.1 | arCOG04458 | 4 | R | COG2457 | S    |  | Uncharacterized protein of DIM6/NTAB family                                           |
| Contig115 | 1030385 | A | G | G | 0.934 | T | T | Halar_1765 | 15  | 0   | 211 | 0   | 226 | ga | Halar_1765 | 2507079683 | gi 345005002 ref YP_004807855.1 | arCOG04458 | 4 | R | COG2457 | S    |  | Uncharacterized protein of DIM6/NTAB family                                           |
| Contig115 | 1090205 | C | T | T | 0.973 | T | F | Halar_1826 | 0   | 7   | 0   | 249 | 256 | gc | Halar_1826 | 2507079744 | gi 345005056 ref YP_004807909.1 | arCOG01173 | 2 | T |         |      |  | RecA-superfamily ATPase implicated in signal transduction                             |
| Contig115 | 1102418 | A | G | G | 1     | T | F | Halar_1840 | 0   | 0   | 303 | 0   | 303 | ca | Halar_1840 | 2507079759 | gi 345005070 ref YP_004807923.1 | arCOG00998 | 1 | K | COG1958 | K    |  | Small nuclear ribonucleoprotein (snRNP) homolog                                       |
| Contig115 | 1128855 | A | G | G | 1     | F | F |            | 0   | 0   | 179 | 0   | 179 | ca |            |            |                                 |            |   |   |         |      |  |                                                                                       |
| Contig115 | 1187430 | G | C | C | 0.908 | T | T | Halar_1927 | 0   | 148 | 15  | 0   | 163 | cg | Halar_1927 | 2507079848 | gi 345005153 ref YP_004808006.1 | arCOG00777 | 3 | Q | COG2050 | Q    |  | HGG motif-containing thioesterase, possibly involved in aromatic compounds catabolism |
| Contig115 | 1187610 | C | T | T | 0.921 | T | T | Halar_1927 | 0   | 21  | 0   | 245 | 266 | gc | Halar_1927 | 2507079848 | gi 345005153 ref YP_004808006.1 | arCOG00777 | 3 | Q | COG2050 | Q    |  | HGG motif-containing thioesterase, possibly involved in aromatic compounds catabolism |
| Contig115 | 1188892 | T | C | C | 0.911 | T | T | Halar_1929 | 0   | 185 | 0   | 18  | 203 | tt | Halar_1929 | 2507079850 | gi 345005155 ref YP_004808008.1 | arCOG01941 | 3 | H | COG0095 | H    |  | Lipoate-protein ligase A                                                              |
| Contig115 | 1229577 | T | G | G | 1     | T | F | Halar_1978 | 0   | 0   | 238 | 0   | 238 | tt | Halar_1978 | 2507079900 | gi 345005197 ref YP_004808050.1 | arCOG06166 | 1 | K |         |      |  | Transcriptional regulator, ArsR family                                                |
| Contig115 | 1301302 | T | C | C | 0.907 | T | T | Halar_2054 | 0   | 253 | 0   | 26  | 279 | tt | Halar_2054 | 2507079977 | gi 345005266 ref YP_004808119.1 | arCOG02267 | 3 | P | COG0306 | P    |  | Phosphate/sulphate permease                                                           |
| Contig115 | 1320817 | C | T | T | 0.903 | F | F |            | 0   | 21  | 0   | 195 | 216 | gc |            |            |                                 |            |   |   |         |      |  |                                                                                       |
| Contig115 | 1344751 | G | A | A | 0.911 | T | F | Halar_2103 | 265 | 0   | 26  | 0   | 291 | cg | Halar_2103 | 2507080027 | gi 345005306 ref YP_004808159.1 | arCOG04302 | 1 | J | COG0008 | J    |  | Glutamyl- or glutaminyl-tRNA synthetase                                               |
| Contig115 | 1345183 | G | A | A | 0.948 | T | F | Halar_2103 | 272 | 0   | 15  | 0   | 287 | ag | Halar_2103 | 2507080027 | gi 345005306 ref YP_004808159.1 | arCOG04302 | 1 | J | COG0008 | J    |  | Glutamyl- or glutaminyl-tRNA                                                          |

|           |         |   |   |   |       |   |   |            |     |     |     |     |     |    |            |                                           |            |   |   |         |     |                                                                                            |  |
|-----------|---------|---|---|---|-------|---|---|------------|-----|-----|-----|-----|-----|----|------------|-------------------------------------------|------------|---|---|---------|-----|--------------------------------------------------------------------------------------------|--|
| Contig115 | 1345200 | T | C | C | 0.983 | T | T | Halar_2103 | 1   | 282 | 1   | 3   | 287 | ct | Halar_2103 | 2507080027gi 345005306 ref YP_004808159.1 | arCOG04302 | 1 | J | COG0008 | J   | synthetase                                                                                 |  |
| Contig115 | 1346686 | A | G | G | 0.946 | T | T | Halar_2104 | 12  | 0   | 212 | 0   | 224 | ca | Halar_2104 | 2507080028gi 345005307 ref YP_004808160.1 | arCOG00915 | 3 | E | COG0160 | E   | 4-aminobutyrate aminotransferase or related aminotransferase                               |  |
| Contig115 | 1347539 | C | T | T | 0.916 | T | F | Halar_2105 | 0   | 25  | 0   | 273 | 298 | gc | Halar_2105 | 2507080029gi 345005308 ref YP_004808161.1 | arCOG07989 | 3 | C |         |     | Rubredoxin family protein                                                                  |  |
| Contig115 | 1347648 | G | C | C | 0.92  | F | F |            | 0   | 276 | 24  | 0   | 300 | tg |            |                                           |            |   |   |         |     |                                                                                            |  |
| Contig115 | 1395989 | T | C | C | 0.983 | T | T | Halar_2152 | 0   | 297 | 0   | 5   | 302 | ct | Halar_2152 | 2507080077gi 345005353 ref YP_004808206.1 | arCOG04524 | 4 | S |         |     | Uncharacterized conserved protein                                                          |  |
| Contig115 | 1428463 | A | G | G | 0.917 | T | T | Halar_2187 | 26  | 0   | 288 | 0   | 314 | ga | Halar_2187 | 2507080112gi 345005388 ref YP_004808241.1 | arCOG04663 | 4 | S |         |     | Uncharacterized conserved protein                                                          |  |
| Contig115 | 1462280 | G | T | T | 1     | T | F | Halar_2224 | 0   | 0   | 0   | 225 | 225 | cg | Halar_2224 | 2507080149gi 345005419 ref YP_004808272.1 | arCOG02202 | 2 | D | COG0206 | D   | Cell division GTPase                                                                       |  |
| Contig115 | 1472604 | C | T | T | 0.942 | T | T | Halar_2235 | 0   | 11  | 0   | 178 | 189 | cc | Halar_2235 | 2507080160gi 345005429 ref YP_004808282.1 | arCOG00102 | 3 | F | COG0047 | F   | Phosphoribosylformylglycinamide (FGAM) synthase, glutamine amidotransferase domain         |  |
| Contig115 | 1494064 | A | G | G | 0.903 | T | T | Halar_2258 | 15  | 0   | 140 | 0   | 155 | aa |            |                                           |            |   |   |         |     |                                                                                            |  |
| Contig115 | 1549576 | A | G | G | 1     | T | T | Halar_2315 | 0   | 0   | 24  | 0   | 24  | ta | Halar_2315 | 2507080241gi 345005504 ref YP_004808357.1 | arCOG00235 | 3 | Q | COG0179 | Q   | 2-keto-4-pentenoate hydratase/2-oxohepta-3-ene-1,7-dioic acid hydratase (catechol pathway) |  |
| Contig115 | 1563121 | T | C | C | 0.906 | T | T | Halar_2328 | 0   | 259 | 0   | 27  | 286 | tt | Halar_2328 | 2507080254gi 345005517 ref YP_004808370.1 | arCOG00271 | 3 | G | COG0697 | GER | Permease of the drug/metabolite transporter (DMT) superfamily                              |  |
| Contig115 | 1563157 | C | T | T | 0.903 | T | T | Halar_2328 | 0   | 26  | 0   | 242 | 268 | tc | Halar_2328 | 2507080254gi 345005517 ref YP_004808370.1 | arCOG00271 | 3 | G | COG0697 | GER | Permease of the drug/metabolite transporter (DMT) superfamily                              |  |
| Contig115 | 1599568 | G | A | A | 0.98  | T | F | Halar_2359 | 193 | 0   | 4   | 0   | 197 | ag | Halar_2359 | 2507080287gi 345005546 ref YP_004808399.1 | arCOG00014 | 3 | G | COG0524 | G   | Sugar kinase, ribokinase family                                                            |  |
| Contig115 | 1694407 | T | C | C | 0.948 | T | F | Halar_2470 | 3   | 275 | 0   | 12  | 290 | tt | Halar_2470 | 2507080398gi 345005644 ref YP_004808497.1 | arCOG04094 | 1 | J | COG0198 | J   | Ribosomal protein L24                                                                      |  |
| Contig115 | 1758515 | A | C | C | 0.954 | T | F | Halar_2551 | 13  | 271 | 0   | 0   | 284 | ta | Halar_2551 | 2507080480gi 345005724 ref YP_004808577.1 | arCOG04817 | 2 | M | COG1083 | M   | CMP-N-acetylneuraminic acid synthetase                                                     |  |
| Contig115 | 1780103 | A | G | G | 0.922 | F | F |            | 22  | 0   | 260 | 0   | 282 | ga |            |                                           |            |   |   |         |     |                                                                                            |  |
| Contig115 | 1780146 | C | T | T | 0.911 | F | F |            | 0   | 24  | 0   | 247 | 271 | cc |            |                                           |            |   |   |         |     |                                                                                            |  |
| Contig115 | 1780171 | C | T | T | 0.918 | F | F |            | 0   | 23  | 0   | 256 | 279 | cc |            |                                           |            |   |   |         |     |                                                                                            |  |
| Contig115 | 1820977 | A | G | G | 0.977 | F | F |            | 6   | 0   | 255 | 0   | 261 | ta |            |                                           |            |   |   |         |     |                                                                                            |  |
| Contig115 | 1925417 | C | G | G | 0.996 | F | F |            | 0   | 1   | 258 | 0   | 259 | tc |            |                                           |            |   |   |         |     |                                                                                            |  |
| Contig115 | 2033878 | T | C | C | 0.924 | F | F |            | 0   | 342 | 0   | 28  | 370 | at |            |                                           |            |   |   |         |     |                                                                                            |  |
| Contig115 | 2048929 | G | A | A | 0.914 | T | T | Halar_2839 | 235 | 0   | 22  | 0   | 257 | cg | Halar_2839 | 2507080773gi 345005991 ref YP_004808844.1 | arCOG00412 | 1 | J | COG0072 | J   | Phenylalanyl-tRNA synthetase beta subunit                                                  |  |
| Contig115 | 2049244 | A | G | G | 0.91  | T | T | Halar_2839 | 23  | 0   | 233 | 0   | 256 | ca | Halar_2839 | 2507080773gi 345005991 ref YP_004808844.1 | arCOG00412 | 1 | J | COG0072 | J   | Phenylalanyl-tRNA synthetase beta subunit                                                  |  |
| Contig115 | 2049329 | C | G | G | 0.921 | T | F | Halar_2839 | 0   | 22  | 258 | 0   | 280 | cc | Halar_2839 | 2507080773gi 345005991 ref YP_004808844.1 | arCOG00412 | 1 | J | COG0072 | J   | Phenylalanyl-tRNA synthetase beta subunit                                                  |  |
| Contig115 | 2095210 | T | C | C | 0.991 | T | T | Halar_2887 | 1   | 224 | 0   | 1   | 226 | ct | Halar_2887 | 2507080821gi 345006038 ref YP_004808891.1 | arCOG01904 | 3 | H | COG1339 | KH  | CTP-dependent Riboflavin kinase                                                            |  |
| Contig115 | 2096384 | A | G | G | 0.956 | T | T | Halar_2888 | 12  | 0   | 261 | 0   | 273 | ga | Halar_2888 | 2507080822gi 345006039 ref YP_004808892.1 | arCOG01320 | 3 | H | COG0108 | H   | 3,4-dihydroxy-2-butanone 4-phosphate synthase                                              |  |
| Contig115 | 2105852 | G | A | A | 0.985 | T | T | Halar_2898 | 133 | 0   | 2   | 0   | 135 | cg | Halar_2898 | 2507080832gi 345006049 ref YP_004808902.1 | arCOG01981 | 1 | K | COG1405 | K   | Transcription initiation factor TFIIB, Brf1 subunit/Transcription initiation factor TFIIB  |  |
| Contig115 | 2105876 | A | G | G | 0.984 | T | T | Halar_2898 | 2   | 0   | 120 | 0   | 122 | ca | Halar_2898 | 2507080832gi 345006049 ref YP_004808902.1 | arCOG01981 | 1 | K | COG1405 | K   | Transcription initiation factor TFIIB, Brf1 subunit/Transcription initiation factor TFIIB  |  |
| Contig115 | 2105894 | C | G | G | 0.974 | T | T | Halar_2898 | 0   | 4   | 148 | 0   | 152 | tc | Halar_2898 | 2507080832gi 345006049 ref YP_004808902.1 | arCOG01981 | 1 | K | COG1405 | K   | Transcription initiation factor TFIIB, Brf1 subunit/Transcription initiation factor TFIIB  |  |
| Contig115 | 2106485 | G | A | A | 0.933 | F | F |            | 28  | 0   | 2   | 0   | 30  | gg |            |                                           |            |   |   |         |     |                                                                                            |  |
| Contig115 | 2116807 | A | G | G | 0.992 | F | F |            | 2   | 0   | 241 | 0   | 243 | ca |            |                                           |            |   |   |         |     |                                                                                            |  |
| Contig115 | 2167873 | T | C | C | 0.996 | T | T | Halar_2957 | 0   | 250 | 0   | 1   | 251 | tt | Halar_2957 | 2507080896gi 345006106 ref YP_004808959.1 | arCOG04128 | 3 | F | COG0035 | F   | Uracil phosphoribosyltransferase                                                           |  |
| Contig115 | 2178771 | C | A | A | 0.919 | T | T | Halar_2968 | 238 | 21  | 0   | 0   | 259 | cc | Halar_2968 | 2507080907gi 345006117 ref YP_004808970.1 | arCOG06550 | 4 | S |         |     | Uncharacterized conserved protein                                                          |  |
| Contig115 | 2219325 | C | T | T | 0.939 | F | F |            | 0   | 16  | 0   | 247 | 263 | ac |            |                                           |            |   |   |         |     |                                                                                            |  |
| Contig115 | 2251531 | G | A | A | 0.902 | T | T | Halar_3041 | 220 | 0   | 24  | 0   | 244 | cg |            |                                           |            |   |   |         |     |                                                                                            |  |
| Contig115 | 2262320 | T | C | C | 0.985 | T | F | Halar_3054 | 0   | 261 | 0   | 4   | 265 | tt | Halar_3054 | 2507080994gi 345006199 ref YP_004809052.1 | arCOG04723 | 4 | S |         |     | Uncharacterized conserved protein                                                          |  |
| Contig115 | 2272020 | A | G | G | 0.979 | F | F |            | 5   | 0   | 230 | 0   | 235 | ga |            |                                           |            |   |   |         |     |                                                                                            |  |
| Contig115 | 2275652 | A | G | G | 1     | T | T | Halar_3068 | 0   | 0   | 293 | 0   | 293 | ta | Halar_3068 | 2507081008gi 345006213 ref YP_004809066.1 | arCOG01115 | 1 | J | COG1571 | R   | tRNA(Ile2)-2-azmatinylcytidine synthetase                                                  |  |





|          |         |   |   |   |       |   |   |              |     |     |     |     |     |    |              |            |                                 |            |   |   |         |    |  |                                                                                       |  |
|----------|---------|---|---|---|-------|---|---|--------------|-----|-----|-----|-----|-----|----|--------------|------------|---------------------------------|------------|---|---|---------|----|--|---------------------------------------------------------------------------------------|--|
| Contig32 | 1299011 | A | G | G | 0.998 | T | F | halTADL_1348 | 1   | 0   | 614 | 0   | 615 | ta | halTADL_1348 | 2507075754 | gi 257053041 ref YP_003130874.1 | arCOG04064 | 2 | M |         |    |  | Predicted membrane-associated Zn-dependent protease                                   |  |
| Contig32 | 1345405 | A | G | G | 1     | F | F |              | 0   | 0   | 99  | 0   | 99  | ta |              |            |                                 |            |   |   |         |    |  |                                                                                       |  |
| Contig32 | 1374401 | A | G | G | 0.912 | T | F | halTADL_1422 | 13  | 0   | 134 | 0   | 147 | ca | halTADL_1422 | 2507075828 | gi 345006615 ref YP_004809468.1 | arCOG03560 | 4 | S |         |    |  | Uncharacterized conserved protein                                                     |  |
| Contig32 | 1467380 | G | A | A | 0.901 | T | T | halTADL_1514 | 154 | 0   | 17  | 0   | 171 | gg | halTADL_1514 | 2507075920 | gi 313117376 ref YP_004044359.1 | arCOG05365 | 3 | I |         |    |  | Oligosaccharyl transferase ST3 subunit related protein                                |  |
| Contig32 | 1532733 | G | A | A | 0.902 | T | T | halTADL_1590 | 632 | 1   | 68  | 0   | 701 | ag | halTADL_1590 | 2507075996 | gi 345133542 ref YP_004821333.1 | arCOG07786 | 1 | K |         |    |  | Predicted Helicase fused to HTH domain                                                |  |
| Contig32 | 1572162 | A | G | G | 0.998 | T | F | halTADL_1627 | 1   | 0   | 564 | 0   | 565 | ca | halTADL_1627 | 2507076034 | gi 257386351 ref YP_003176124.1 | arCOG02320 | 2 | N |         |    |  | Methyl-accepting chemotaxis protein                                                   |  |
| Contig32 | 1580276 | T | C | C | 0.998 | T | T | halTADL_1636 | 0   | 521 | 0   | 1   | 522 | tt | halTADL_1636 | 2507076043 | gi 292654994 ref YP_003534891.1 | arCOG01226 | 3 | E | COG1703 | E  |  | Putative periplasmic protein kinase ArgK or related GTPase of G3E family              |  |
| Contig32 | 1581133 | A | G | G | 1     | T | T | halTADL_1638 | 0   | 0   | 517 | 0   | 517 | aa | halTADL_1638 | 2507076045 | gi 289580799 ref YP_003479265.1 | arCOG01134 | 3 | E | COG0436 | E  |  | Aspartate/tyrosine/aromatic aminotransferase                                          |  |
| Contig32 | 1593404 | T | C | C | 1     | T | F | halTADL_1654 | 0   | 518 | 0   | 0   | 518 | at | halTADL_1654 | 2507076061 | gi 292654901 ref YP_003534798.1 | arCOG06212 | 4 | S |         |    |  | Uncharacterized conserved protein                                                     |  |
| Contig32 | 1621702 | A | G | G | 0.996 | T | F | halTADL_1680 | 1   | 0   | 227 | 0   | 228 | ta | halTADL_1680 | 2507076087 | gi 292494093 ref YP_003533236.1 | arCOG03902 | 1 | L |         |    |  | Transposase                                                                           |  |
| Contig32 | 1649558 | C | T | T | 0.998 | F | F |              | 1   | 0   | 0   | 512 | 513 | cc |              |            |                                 |            |   |   |         |    |  |                                                                                       |  |
| Contig32 | 1654847 | C | G | G | 0.996 | F | F |              | 0   | 2   | 452 | 0   | 454 | cc |              |            |                                 |            |   |   |         |    |  |                                                                                       |  |
| Contig32 | 1674277 | T | C | C | 0.998 | T | T | halTADL_1742 | 0   | 434 | 1   | 0   | 435 | tt | halTADL_1742 | 2507076150 | gi 55379271 ref YP_137121.1     | arCOG00067 | 3 | F | COG0462 | FE |  | Phosphoribosylpyrophosphate synthetase                                                |  |
| Contig32 | 1678908 | T | C | C | 1     | T | F | halTADL_1748 | 0   | 429 | 0   | 0   | 429 | ct | halTADL_1748 | 2507076156 | gi 313124906 ref YP_004035170.1 | arCOG00041 | 4 | R | COG1926 | R  |  | Predicted phosphoribosyltransferase                                                   |  |
| Contig32 | 1769210 | A | G | G | 0.995 | T | F | halTADL_1838 | 2   | 1   | 575 | 0   | 578 | ta | halTADL_1838 | 2507076246 | gi 222480670 ref YP_002566907.1 | arCOG02395 | 2 | N | COG0835 | NT |  | Chemotaxis signal transduction protein                                                |  |
| Contig32 | 1769934 | T | C | C | 1     | F | F |              | 0   | 603 | 0   | 0   | 603 | ct |              |            |                                 |            |   |   |         |    |  |                                                                                       |  |
| Contig32 | 1770705 | A | G | G | 1     | F | F |              | 0   | 0   | 406 | 0   | 406 | ca |              |            |                                 |            |   |   |         |    |  |                                                                                       |  |
| Contig32 | 1939040 | T | C | C | 1     | T | F | halTADL_2014 | 0   | 98  | 0   | 0   | 98  | gt | halTADL_2014 | 2507076424 | gi 336251627 ref YP_004598858.1 | arCOG09003 | 4 | S |         |    |  | Uncharacterized conserved protein                                                     |  |
| Contig32 | 2048957 | A | G | G | 0.981 | T | T | halTADL_2141 | 9   | 0   | 472 | 0   | 481 | ca | halTADL_2141 | 2507076551 | gi 257052607 ref YP_003130440.1 | arCOG00266 | 4 | R |         |    |  | Sulfite oxidase or related enzyme                                                     |  |
| Contig32 | 2049131 | C | T | T | 0.99  | T | T | halTADL_2141 | 0   | 5   | 0   | 515 | 520 | tc | halTADL_2141 | 2507076551 | gi 257052607 ref YP_003130440.1 | arCOG00266 | 4 | R |         |    |  | Sulfite oxidase or related enzyme                                                     |  |
| Contig32 | 2058128 | T | C | C | 0.96  | T | T | halTADL_2151 | 0   | 499 | 0   | 21  | 520 | ct | halTADL_2151 | 2507076561 | gi 55378844 ref YP_136694.1     | arCOG00318 | 3 | P | COG0704 | P  |  | Phosphate uptake regulator ABC-type phosphate transport system, periplasmic component |  |
| Contig32 | 2062298 | T | C | C | 0.944 | T | F | halTADL_2155 | 1   | 286 | 0   | 16  | 303 | tt | halTADL_2155 | 2507076565 | gi 313125578 ref YP_004035842.1 | arCOG00213 | 3 | P | COG0226 | P  |  | ABC-type phosphate transport system, periplasmic component                            |  |
| Contig32 | 2063372 | A | G | G | 0.947 | F | F |              | 29  | 0   | 517 | 0   | 546 | ca |              |            |                                 |            |   |   |         |    |  |                                                                                       |  |
| Contig32 | 2076214 | T | C | C | 0.998 | T | T | halTADL_2168 | 0   | 456 | 0   | 1   | 457 | ct | halTADL_2168 | 2507076578 | gi 222480481 ref YP_002566718.1 | arCOG01701 | 1 | J |         |    |  | tRNA splicing endonuclease                                                            |  |
| Contig32 | 2165082 | T | C | C | 1     | T | T | halTADL_2249 | 0   | 485 | 0   | 0   | 485 | at | halTADL_2249 | 2507076666 | gi 110667688 ref YP_657499.1    | arCOG00024 | 3 | C | COG0554 | C  |  | Glycerol kinase                                                                       |  |
| Contig32 | 2165893 | A | C | C | 0.945 | T | F | halTADL_2249 | 26  | 445 | 0   | 0   | 471 | ga | halTADL_2249 | 2507076666 | gi 110667688 ref YP_657499.1    | arCOG00024 | 3 | C | COG0554 | C  |  | Glycerol kinase                                                                       |  |
| Contig32 | 2166321 | A | G | G | 0.988 | T | F | halTADL_2250 | 5   | 0   | 505 | 1   | 511 | ga | halTADL_2250 | 2507076667 | gi 300711496 ref YP_003737310.1 | arCOG04584 | 4 | S |         |    |  | Uncharacterized conserved protein                                                     |  |
| Contig32 | 2188888 | A | G | G | 1     | T | F | halTADL_2275 | 0   | 0   | 130 | 0   | 130 | ca | halTADL_2275 | 2507076692 | gi 345005189 ref YP_004808042.1 | arCOG01743 | 1 | J | COG1503 | J  |  | Peptide chain release factor 1 (eRF1)                                                 |  |
| Contig32 | 2208047 | A | G | G | 0.908 | T | F | halTADL_2296 | 49  | 0   | 495 | 1   | 545 | ga | halTADL_2296 | 2507076713 | gi 292656745 ref YP_003536642.1 | arCOG04783 | 3 | P | COG0569 | P  |  | TrkA, K+ transport system, NAD-binding component                                      |  |
| Contig32 | 2223689 | A | G | G | 0.969 | T | T | halTADL_2309 | 13  | 1   | 462 | 1   | 477 | ga | halTADL_2309 | 2507076726 | gi 313127513 ref YP_004037783.1 | arCOG00757 | 3 | E | COG0404 | E  |  | Glycine cleavage system T protein (aminomethyltransferase)                            |  |
| Contig32 | 2263765 | G | C | C | 0.933 | T | T | halTADL_2352 | 0   | 56  | 4   | 0   | 60  | gg | halTADL_2352 | 2507076770 | gi 76801912 ref YP_326920.1     | arCOG02814 | 3 | Q | COG2124 | Q  |  | Cytochrome P450                                                                       |  |
| Contig32 | 2295886 | T | G | G | 1     | F | F |              | 0   | 0   | 77  | 0   | 77  | at |              |            |                                 |            |   |   |         |    |  |                                                                                       |  |
| Contig32 | 2295897 | T | G | G | 0.909 | F | F |              | 0   | 0   | 70  | 7   | 77  | tt |              |            |                                 |            |   |   |         |    |  |                                                                                       |  |
| Contig32 | 2296794 | C | G | G | 1     | T | F | halTADL_2389 | 0   | 0   | 197 | 0   | 197 | cc |              |            |                                 |            |   |   |         |    |  |                                                                                       |  |
| Contig32 | 2320353 | T | C | C | 0.923 | T | F | halTADL_2408 | 0   | 36  | 0   | 3   | 39  | at | halTADL_2408 | 2507076826 | gi 344210289 ref YP_004786465.1 | arCOG01403 | 2 | M |         |    |  | Glycosyltransferase                                                                   |  |
| Contig32 | 2328402 | A | G | G | 1     | T | F | halTADL_2415 | 0   | 0   | 264 | 0   | 264 | ta | halTADL_2415 | 2507076833 | gi 344211125 ref YP_004795445.1 | arCOG00546 | 1 | J | COG0595 | R  |  | mRNA degradation ribonuclease J1/J2 (metallo-beta-lactamase superfamily)              |  |
| Contig32 | 2332265 | T | A | A | 0.909 | T | F | halTADL_2418 | 579 | 0   | 0   | 58  | 637 | gt | halTADL_2418 | 2507076836 | gi 222480519 ref YP_002566756.1 | arCOG00982 | 3 | C | COG0371 | C  |  | Glycerol dehydrogenase or related enzyme                                              |  |
| Contig32 | 2350562 | T | C | C | 0.917 | T | T | halTADL_2434 | 0   | 319 | 0   | 29  | 348 | tt | halTADL_2434 | 2507076852 | gi 336254250 ref YP_004597357.1 | arCOG01308 | 2 | O |         |    |  | ATPase of the AAA+ class, CDC48 family                                                |  |
| Contig32 | 2351003 | A | G | G | 0.914 | T | T | halTADL_2434 | 31  | 0   | 331 | 0   | 362 | aa | halTADL_2434 | 2507076852 | gi 336254250 ref YP_004597357.1 | arCOG01308 | 2 | O |         |    |  | ATPase of the AAA+ class, CDC48 family                                                |  |
| Contig32 | 2351597 | C | T | T | 0.907 | T | T | halTADL_2434 | 0   | 31  | 0   | 304 | 335 | tc | halTADL_2434 | 2507076852 | gi 336254250 ref YP_004597357.1 | arCOG01308 | 2 | O |         |    |  | ATPase of the AAA+ class, CDC48 family                                                |  |
| Contig32 | 2351603 | G | A | A | 0.918 | T | T | halTADL_2434 | 312 | 0   | 28  | 0   | 340 | ag | halTADL_2434 | 2507076852 | gi 336254250 ref YP_004597357.1 | arCOG01308 | 2 | O |         |    |  | ATPase of the AAA+ class, CDC48 family                                                |  |
| Contig32 | 2352542 | T | C | C | 0.952 | T | F | halTADL_2435 | 0   | 315 | 0   | 16  | 331 | tt | halTADL_2435 | 2507076853 | gi 222479025 ref YP_002565262.1 | arCOG00800 | 1 | L | COG1468 | L  |  | RecB family exonuclease                                                               |  |
| Contig32 | 2352609 | T | C | C | 0.93  | T | T | halTADL_2435 | 0   | 387 | 1   | 28  | 416 | ct | halTADL_2435 | 2507076853 | gi 222479025 ref YP_002565262.1 | arCOG00800 | 1 | L | COG1468 | L  |  | RecB family exonuclease                                                               |  |



|                 |        |   |   |   |       |   |   |             |     |     |     |     |     |    |             |                                           |            |   |   |         |   |                                                                                                   |
|-----------------|--------|---|---|---|-------|---|---|-------------|-----|-----|-----|-----|-----|----|-------------|-------------------------------------------|------------|---|---|---------|---|---------------------------------------------------------------------------------------------------|
| HalDL1_Contig37 | 3828   | C | A | A | 0.987 | T | F | HalDL1_3056 | 153 | 2   | 0   | 0   | 155 | gc | HalDL1_3056 | 2507057197gi 345007177 ref YP_004810029.1 | arCOG07742 | 4 | S |         |   | Uncharacterized conserved protein                                                                 |
| HalDL1_Contig37 | 13562  | C | G | G | 0.977 | T | F | HalDL1_3064 | 0   | 4   | 171 | 0   | 175 | cc | HalDL1_3064 | 2507057205gi 257052527 ref YP_003130360.1 | arCOG01445 | 2 | V | COG1203 | R | CRISPR-associated helicase Cas3                                                                   |
| HalDL1_Contig37 | 20982  | G | A | A | 0.953 | T | T | HalDL1_3068 | 81  | 0   | 4   | 0   | 85  | ag | HalDL1_3068 | 2507057209gi 345007408 ref YP_004810260.1 | arCOG06564 | 4 | S |         |   | Uncharacterized conserved protein                                                                 |
| HalDL1_Contig37 | 20985  | T | C | C | 0.976 | T | T | HalDL1_3068 | 0   | 81  | 0   | 2   | 83  | tt | HalDL1_3068 | 2507057209gi 345007408 ref YP_004810260.1 | arCOG06564 | 4 | S |         |   | Uncharacterized conserved protein                                                                 |
| HalDL1_Contig37 | 128178 | C | T | T | 0.924 | T | T | HalDL1_3179 | 0   | 11  | 0   | 134 | 145 | ac | HalDL1_3179 | 2507057320gi 292653597 ref YP_003533493.1 | arCOG08895 | 4 | S |         |   | Uncharacterized conserved protein                                                                 |
| HalDL1_Contig37 | 168583 | A | G | G | 0.98  | T | T | HalDL1_3225 | 2   | 0   | 98  | 0   | 100 | ta | HalDL1_3225 | 2507057366gi 292656395 ref YP_003536292.1 | arCOG01764 | 1 | K | COG2101 | K | TATA-box binding protein (TBP), component of TFIID and TFIIB                                      |
| HalDL1_Contig37 | 168613 | G | A | A | 0.996 | T | T | HalDL1_3225 | 222 | 0   | 1   | 0   | 223 | cg | HalDL1_3225 | 2507057366gi 292656395 ref YP_003536292.1 | arCOG01764 | 1 | K | COG2101 | K | TATA-box binding protein (TBP), component of TFIID and TFIIB                                      |
| HalDL1_Contig37 | 168661 | A | G | G | 0.988 | T | T | HalDL1_3225 | 2   | 0   | 246 | 1   | 249 | ca | HalDL1_3225 | 2507057366gi 292656395 ref YP_003536292.1 | arCOG01764 | 1 | K | COG2101 | K | TATA-box binding protein (TBP), component of TFIID and TFIIB                                      |
| HalDL1_Contig37 | 168724 | T | C | C | 0.971 | T | T | HalDL1_3225 | 0   | 66  | 0   | 2   | 68  | at | HalDL1_3225 | 2507057366gi 292656395 ref YP_003536292.1 | arCOG01764 | 1 | K | COG2101 | K | TATA-box binding protein (TBP), component of TFIID and TFIIB                                      |
| HalDL1_Contig37 | 168737 | C | T | T | 0.933 | T | F | HalDL1_3225 | 0   | 1   | 0   | 14  | 15  | gc | HalDL1_3225 | 2507057366gi 292656395 ref YP_003536292.1 | arCOG01764 | 1 | K | COG2101 | K | TATA-box binding protein (TBP), component of TFIID and TFIIB                                      |
| HalDL1_Contig37 | 169962 | A | G | G | 0.966 | T | T | HalDL1_3227 | 2   | 0   | 57  | 0   | 59  | ga | HalDL1_3227 | 2507057368gi 298674426 ref YP_003726176.1 | arCOG00879 | 2 | V | COG0610 | V | Type I site-specific restriction modification system, R (restriction) subunit or related helicase |
| HalDL1_Contig37 | 169975 | T | C | C | 0.987 | T | F | HalDL1_3227 | 0   | 76  | 0   | 1   | 77  | ct | HalDL1_3227 | 2507057368gi 298674426 ref YP_003726176.1 | arCOG00879 | 2 | V | COG0610 | V | Type I site-specific restriction modification system, R (restriction) subunit or related helicase |
| HalDL1_Contig37 | 170328 | A | T | T | 0.966 | T | T | HalDL1_3227 | 4   | 0   | 0   | 112 | 116 | aa | HalDL1_3227 | 2507057368gi 298674426 ref YP_003726176.1 | arCOG00879 | 2 | V | COG0610 | V | Type I site-specific restriction modification system, R (restriction) subunit or related helicase |
| HalDL1_Contig37 | 170370 | A | G | G | 0.973 | T | T | HalDL1_3227 | 5   | 0   | 179 | 0   | 184 | ca | HalDL1_3227 | 2507057368gi 298674426 ref YP_003726176.1 | arCOG00879 | 2 | V | COG0610 | V | Type I site-specific restriction modification system, R (restriction) subunit or related helicase |
| HalDL1_Contig37 | 170493 | T | C | C | 0.977 | T | T | HalDL1_3227 | 1   | 128 | 0   | 2   | 131 | tt | HalDL1_3227 | 2507057368gi 298674426 ref YP_003726176.1 | arCOG00879 | 2 | V | COG0610 | V | Type I site-specific restriction modification system, R (restriction) subunit or related helicase |
| HalDL1_Contig37 | 170514 | G | A | A | 0.988 | T | T | HalDL1_3227 | 169 | 0   | 2   | 0   | 171 | cg | HalDL1_3227 | 2507057368gi 298674426 ref YP_003726176.1 | arCOG00879 | 2 | V | COG0610 | V | Type I site-specific restriction modification system, R (restriction) subunit or related helicase |
| HalDL1_Contig37 | 170577 | A | G | G | 0.984 | T | T | HalDL1_3227 | 3   | 0   | 180 | 0   | 183 | ca | HalDL1_3227 | 2507057368gi 298674426 ref YP_003726176.1 | arCOG00879 | 2 | V | COG0610 | V | Type I site-specific restriction modification system, R (restriction) subunit or related helicase |
| HalDL1_Contig37 | 170619 | G | C | C | 0.937 | T | T | HalDL1_3227 | 0   | 59  | 4   | 0   | 63  | cg | HalDL1_3227 | 2507057368gi 298674426 ref YP_003726176.1 | arCOG00879 | 2 | V | COG0610 | V | Type I site-specific restriction modification system, R (restriction) subunit or related helicase |
| HalDL1_Contig37 | 171114 | G | R | A | 0.907 | T | T | HalDL1_3227 | 39  | 0   | 4   | 0   | 43  | gg | HalDL1_3227 | 2507057368gi 298674426 ref YP_003726176.1 | arCOG00879 | 2 | V | COG0610 | V | Type I site-specific restriction modification system, R (restriction) subunit or related helicase |
| HalDL1_Contig37 | 171132 | A | G | G | 0.975 | T | T | HalDL1_3227 | 2   | 0   | 79  | 0   | 81  | ca | HalDL1_3227 | 2507057368gi 298674426 ref YP_003726176.1 | arCOG00879 | 2 | V | COG0610 | V | Type I site-specific restriction modification system, R (restriction) subunit or related helicase |
| HalDL1_Contig37 | 171273 | A | G | G | 0.984 | T | T | HalDL1_3227 | 1   | 0   | 63  | 0   | 64  | ga | HalDL1_3227 | 2507057368gi 298674426 ref YP_003726176.1 | arCOG00879 | 2 | V | COG0610 | V | Type I site-specific restriction modification system, R (restriction) subunit or related helicase |
| HalDL1_Contig37 | 171300 | C | T | T | 0.955 | T | T | HalDL1_3227 | 0   | 2   | 0   | 42  | 44  | gc | HalDL1_3227 | 2507057368gi 298674426 ref YP_003726176.1 | arCOG00879 | 2 | V | COG0610 | V | Type I site-specific restriction modification system, R (restriction) subunit or related helicase |
| HalDL1_Contig37 | 174803 | A | G | G | 0.965 | T | T | HalDL1_3229 | 5   | 0   | 137 | 0   | 142 | ga | HalDL1_3229 | 2507057370gi 298674424 ref YP_003726174.1 | arCOG05282 | 2 | V |         |   | Type I restriction-modification system methyltransferase                                          |









|           |         |   |   |   |       |   |   |           |     |     |     |     |     |    |           |           |                                 |            |   |   |         |   |                                                                         |
|-----------|---------|---|---|---|-------|---|---|-----------|-----|-----|-----|-----|-----|----|-----------|-----------|---------------------------------|------------|---|---|---------|---|-------------------------------------------------------------------------|
| NC_012029 | 2600932 | C | T | T | 0.982 | T | F | Hlac_2619 | 0   | 2   | 0   | 107 | 109 | cc | Hlac_2619 | 643709691 | gi 222481023 ref YP_002567260.1 | arCOG00112 | 3 | E | COG0137 | E | aminotransferase                                                        |
| NC_012029 | 2610263 | A | G | G | 0.919 | F | F |           | 8   | 0   | 91  | 0   | 99  | ca |           |           |                                 |            |   |   |         |   | Argininosuccinate synthase                                              |
| NC_012029 | 2662169 | G | C | C | 0.972 | T | T | Hlac_2675 | 0   | 104 | 3   | 0   | 107 | cg | Hlac_2675 | 643709748 | gi 222481079 ref YP_002567316.1 | arCOG06335 | 4 | S |         |   | Uncharacterized conserved protein                                       |
| NC_012029 | 2708842 | C | G | G | 0.986 | T | T | Hlac_2719 | 0   | 1   | 73  | 0   | 74  | gc | Hlac_2719 | 643709794 | gi 222481123 ref YP_002567360.1 | arCOG01434 | 3 | E | COG0498 | E | Threonine synthase and cysteate synthase                                |
| NC_012030 | 55617   | G | C | C | 0.907 | F | F |           | 1   | 567 | 57  | 0   | 625 | cg |           |           |                                 |            |   |   |         |   |                                                                         |
| NC_012030 | 63886   | G | T | T | 1     | F | F |           | 0   | 0   | 0   | 22  | 22  | gg |           |           |                                 |            |   |   |         |   |                                                                         |
| NC_012030 | 67997   | T | G | G | 0.973 | F | F |           | 0   | 0   | 72  | 2   | 74  | ct |           |           |                                 |            |   |   |         |   |                                                                         |
| NC_012030 | 79998   | C | T | T | 1     | T | F | Hlac_3329 | 0   | 0   | 0   | 385 | 385 | tc | Hlac_3329 | 643709881 | gi 222481211 ref YP_002567447.1 | arCOG01445 | 2 | V | COG1203 | R | CRISPR-associated helicase Cas3                                         |
| NC_012030 | 118390  | T | C | C | 0.958 | T | T | Hlac_3363 | 1   | 346 | 0   | 14  | 361 | gt | Hlac_3363 | 643709914 | gi 222481244 ref YP_002567480.1 | arCOG00683 | 1 | L | COG0675 | L | Transposase                                                             |
| NC_012030 | 320531  | A | G | G | 0.972 | T | T | Hlac_3570 | 7   | 0   | 247 | 0   | 254 | ca | Hlac_3570 | 643710108 | gi 222481438 ref YP_002567674.1 | arCOG04814 | 2 | V |         |   | Type II restriction enzyme, methylase subunit                           |
| NC_012030 | 333711  | C | T | T | 1     | F | F |           | 0   | 0   | 0   | 6   | 6   | gc |           |           |                                 |            |   |   |         |   |                                                                         |
| NC_012030 | 341791  | A | C | C | 0.979 | T | F | Hlac_3589 | 6   | 282 | 0   | 0   | 288 | ca | Hlac_3589 | 643710127 | gi 222481457 ref YP_002567693.1 | arCOG02416 | 2 | N |         |   | Predicted flagellin FlaG                                                |
| NC_012030 | 422873  | G | C | C | 0.916 | T | F | Hlac_3662 | 0   | 206 | 19  | 0   | 225 | tg | Hlac_3662 | 643710193 | gi 222481523 ref YP_002567759.1 | arCOG06250 | 4 | S |         |   | Uncharacterized conserved protein                                       |
| NC_012030 | 423678  | A | G | G | 0.947 | T | F | Hlac_3663 | 9   | 0   | 162 | 0   | 171 | ta | Hlac_3663 | 643710194 | gi 222481524 ref YP_002567760.1 | arCOG06251 | 2 | M |         |   | UDP-N-acetylmuramyl tripeptide synthase and Folylpolyglutamate synthase |
| NC_012030 | 424603  | C | A | A | 0.939 | T | F | Hlac_3663 | 154 | 10  | 0   | 0   | 164 | cc | Hlac_3663 | 643710194 | gi 222481524 ref YP_002567760.1 | arCOG06251 | 2 | M |         |   | UDP-N-acetylmuramyl tripeptide synthase and Folylpolyglutamate synthase |
| NC_012030 | 425052  | A | G | G | 0.983 | T | F | Hlac_3663 | 2   | 0   | 119 | 0   | 121 | ta | Hlac_3663 | 643710194 | gi 222481524 ref YP_002567760.1 | arCOG06251 | 2 | M |         |   | UDP-N-acetylmuramyl tripeptide synthase and Folylpolyglutamate synthase |

**Table S7. Fixed SNPs in tADL assigned to arCOGs.**

| <b>Count</b> | <b>Functional category</b> | <b>Functional description</b>                                | <b>Class</b> | <b>Class description</b>           |
|--------------|----------------------------|--------------------------------------------------------------|--------------|------------------------------------|
| 17           | R                          | General function prediction only                             | 4            | POORLY CHARACTERIZED               |
| 11           | C                          | Energy production and conversion                             | 3            | METABOLISM                         |
| 9            | L                          | Replication; recombination and repair                        | 1            | INFORMATION STORAGE AND PROCESSING |
| 8            | J                          | Translation; ribosomal structure and biogenesis              | 1            | INFORMATION STORAGE AND PROCESSING |
| 6            | E                          | Amino acid transport and metabolism                          | 3            | METABOLISM                         |
| 6            | G                          | Carbohydrate transport and metabolism                        | 3            | METABOLISM                         |
| 6            | P                          | Inorganic ion transport and metabolism                       | 3            | METABOLISM                         |
| 5            | S                          | Function unknown                                             | 4            | POORLY CHARACTERIZED               |
| 5            | T                          | Signal transduction mechanisms                               | 2            | CELLULAR PROCESSES AND SIGNALING   |
| 4            | M                          | Cell wall/membrane/envelope biogenesis                       | 2            | CELLULAR PROCESSES AND SIGNALING   |
| 4            | O                          | Posttranslational modification; protein turnover; chaperones | 2            | CELLULAR PROCESSES AND SIGNALING   |
| 3            | F                          | Nucleotide transport and metabolism                          | 3            | METABOLISM                         |
| 3            | K                          | Transcription                                                | 1            | INFORMATION STORAGE AND PROCESSING |
| 2            | N                          | Cell motility                                                | 2            | CELLULAR PROCESSES AND SIGNALING   |
| 1            | D                          | Cell cycle control; cell division; chromosome partitioning   | 2            | CELLULAR PROCESSES AND SIGNALING   |
| 1            | Q                          | Secondary metabolites biosynthesis; transport and catabolism | 3            | METABOLISM                         |

**Table S8. Similarity matrices for the primary replicons of tADL, DL31, *Hl* and DL1, and the “tADL-related 5<sup>th</sup> genome”<sup>1</sup>.**

| <b>TUD</b>            | <b>5th_genome</b> | <b>DL1:Contig38</b> | <b>DL31:Contig115</b> | <b>Hl:NC_012029</b> | <b>tADL:Contig32</b> |
|-----------------------|-------------------|---------------------|-----------------------|---------------------|----------------------|
| <b>5th_genome</b>     | 1                 |                     |                       |                     |                      |
| <b>DL1:Contig38</b>   | 0.801             | 1                   |                       |                     |                      |
| <b>DL31:Contig115</b> | 0.836             | 0.945               | 1                     |                     |                      |
| <b>Hl:NC_012029</b>   | 0.862             | 0.834               | 0.777                 | 1                   |                      |
| <b>tADL:Contig32</b>  | 0.959             | 0.779               | 0.858                 | 0.785               | 1                    |
|                       |                   |                     |                       |                     |                      |
| <b>ANib</b>           | <b>5th_genome</b> | <b>DL1:Contig38</b> | <b>DL31:Contig115</b> | <b>Hl:NC_012029</b> | <b>tADL:Contig32</b> |
| <b>5th_genome</b>     | 1                 |                     |                       |                     |                      |
| <b>DL1:Contig38</b>   | 0.697             | 1                   |                       |                     |                      |
| <b>DL31:Contig115</b> | 0.699             | 0.715               | 1                     |                     |                      |
| <b>Hl:NC_012029</b>   | 0.716             | 0.727               | 0.723                 | 1                   |                      |
| <b>tADL:Contig32</b>  | 0.802             | 0.710               | 0.720                 | 0.734               | 1                    |

<sup>1</sup> Similarity matrices for BLASTN average nucleotide identity (ANib) and tetranucleotide usage deviation (TUD) regression coefficients as determined by JSpecies for DL primary replicons. The 52 contigs attributed to “tADL-related 5<sup>th</sup> genome” are also included. For both metrics the tADL and “tADL-related 5<sup>th</sup> genome” are the most similar.

**Table S9. Haloarchaeal genomes used for ANI and HIR analyses.**

| <b>Short name</b> | <b>Long name</b>                              |
|-------------------|-----------------------------------------------|
| DL1               | Halobacterium sp. DL1                         |
| DL31              | halophilic archaeon DL31                      |
| tADL              | halophilic archaeon True-ADL                  |
| H.lacusprofundi   | Halorubrum lacusprofundi ATCC 49239           |
| H.borinquense     | Halogeometricum borinquense PR3, DSM 11551    |
| H.hispanica       | Haloarcula hispanica CGMCC 1.2049             |
| H.jeotgali        | Halalkalicoccus jeotgali B3, DSM 18796        |
| H.marismortui     | Haloarcula marismortui ATCC 43049             |
| H.mediterranei    | Haloferax mediterranei R-4, ATCC 33500        |
| H.mukohataei      | Halomicrobium mukohataei arg-2, DSM 12286     |
| H.ruber           | Halovivax ruber XH-70, DSM 18193              |
| H.salinarum       | Halobacterium salinarum R1, DSM 671           |
| H.turkmenica      | Haloterrigena turkmenica VKM B-1734, DSM 5511 |
| H.utahensis       | Halorhabdus utahensis AX-2, DSM 12940         |
| H.volcanii        | Haloferax volcanii DS2, ATCC 29605            |
| H.walsbyi         | Haloquadratum walsbyi HBSQ001, DSM 16790      |
| H.walsbyi_C23     | Haloquadratum walsbyi C23, DSM 16854          |
| H.xanaduensis     | Halopiger xanaduensis SH-6                    |
| Halo_NRC-1        | Halobacterium sp. NRC-1                       |
| N.gregoryi        | Natronobacterium gregoryi SP2, DSM 3393       |
| N.magadii         | Natrialba magadii ATCC 43099                  |
| N.occultus        | Natronococcus occultus SP4, DSM 3396          |
| N.pellirubrum     | Natrinema pellirubrum 157, JCM 10476          |
| N.pharaonis       | Natronomonas pharaonis Gabara, DSM 2160       |
| Nat_J7-2          | Natrinema sp. J7-2                            |

**Table S10. Total length of HIR (bp) shared between the four DL genomes.**

|                  | <b>tADL</b> | <b>DL31</b> | <b><i>HI</i></b> |
|------------------|-------------|-------------|------------------|
| <b>DL31</b>      | 6561        |             |                  |
| <b><i>HI</i></b> | 47829       | 138307      |                  |
| <b>DL1</b>       | 22569       | 68558       | 132560           |

**Table S11. PCR primers used to amplify HIR.**

| Taxon + Shared region          | Primer sequence             |
|--------------------------------|-----------------------------|
| HalDL1_Contig37 20871..25836   | ATAGACCTACACGAGAACACGACCAAG |
| HalDL1_Contig37 20871..25836   | ACGCCCTACGAGACAGTGAGACAG    |
| HalDL1_Contig37 20871..25836   | GCCTGCTGCTTGGCGAGGAGTTC     |
| HalDL1_Contig37 20871..25836   | CGTGAGACCGTGCAGGGTATG       |
| HalDL1_Contig37 40156..44084   | CCCCGATAGTAGTAATCAGAGGC     |
| HalDL1_Contig37 40156..44084   | GTAGAAA TACGCAGTGGACGAACCC  |
| HalDL1_Contig37 40156..44084   | CAGTCTCCACAGGCGTTGATTC      |
| HalDL1_Contig37 40156..44084   | AGCAGTTTGTAGCGGTAAGC        |
| HalDL1_Contig37 44074..49706   | CAGTCTCCACAGGCGTTGATTC      |
| HalDL1_Contig37 44074..49706   | AGCAGTTTGTAGCGGTAAGC        |
| HalDL1_Contig37 44074..49706   | CGCCGTTGCCGTGAAGATG         |
| HalDL1_Contig37 44074..49706   | GTAGAGTTCGCCGAGCGTGATG      |
| HalDL1_Contig37 49699..61930   | CGCCGTTGCCGTGAAGATG         |
| HalDL1_Contig37 49699..61930   | GTAGAGTTCGCCGAGCGTGATG      |
| HalDL1_Contig37 70308..74648   | GGCTGACATCTAAGCACTCGG       |
| HalDL1_Contig37 70308..74648   | GGCGGGACCTCAATCAACCAC       |
| HalDL1_Contig37 70308..74648   | GGCTGTATGGCGTGTGTATTG       |
| HalDL1_Contig37 70308..74648   | CTTGTTCCAGAAAGCGTCGTG       |
| HalDL1_Contig37 101134..105279 | GACGATGATACCAGCACCC         |
| HalDL1_Contig37 101134..105279 | GTTTCGCAACCAGATACGC         |
| HalDL1_Contig37 102306..105542 | CGTGTATCGGAATCATTGGAGGAG    |
| HalDL1_Contig37 102306..105542 | GGTTGGTTTCGTGAGCGTGTTC      |
| HalDL1_Contig37 102306..105542 | GATAACGGGTGACTCATACGCC      |
| HalDL1_Contig37 102306..105542 | GCAGGTC TCGCTGTCAGTGTTC     |
| HalDL1_Contig38 453313..459149 | GCAAGCCCGACTAAGACAG         |
| HalDL1_Contig38 453313..459149 | CTGATGGTGAAGATGCTGACCG      |
| HalDL1_Contig38 453313..459149 | CTCCGATGAGACTCCCACTG        |
| HalDL1_Contig38 453313..459149 | CAGCGTGTTCAGGGCGTC          |
| H.lac NC_012028 7615..29467    | CCAGAATCAGAGACATCGCTCAAG    |
| H.lac NC_012028 7615..29467    | GTAGTAGTATCTGTAGTACCTCGGCAC |
| H.lac NC_012028 7615..29467    | GCGGGAAGATCAGTGAGTACGAC     |
| H.lac NC_012028 7615..29467    | GAAGAGTAGTGGGAACGACGGC      |
| H.lac NC_012028 54359..60782   | CGGCGTTCTCAGGTTCTTCG        |
| H.lac NC_012028 54359..60782   | GCTAAGATAGTACAGTGCCGTGG     |
| H.lac NC_012028 54359..60782   | GCCCGCAATGACGAAGAC          |
| H.lac NC_012028 54359..60782   | GACGGCTTCTTCAGATCCCC        |
| DL31_Contig114 59595..76202    | GGCTGGGCTGGAACGAGAC         |
| DL31_Contig114 59595..76202    | GGTAGTGCTACGCTAAAACAGTGCC   |
| DL31_Contig114 59595..76202    | GGACTACGGTGGCAATCTCTAATAATG |
| DL31_Contig114 59595..76202    | GAGGAGGCTATAAATGGTGAATCGGG  |
| DL31_Contig114 111139..146012  | GCGTCGGAATCAGTGTGAG         |
| DL31_Contig114 111139..146012  | CCTCAGAGAGTTACACGTCCA TCC   |
| DL31_Contig114 664513..683577  | CCCAACCCACC GTTTTG          |
| DL31_Contig114 664513..683577  | GTATGATGGATCGTTGACCTCGG     |
| DL31_Contig114 664513..683577  | CGATACTAATGT CCTCACTCAACTGG |
| DL31_Contig114 664513..683577  | CACTCTCACCGTCTCGTCC         |
| True-ADL 1940216..1952775      | GCCGATGTTCCGAGAGGTT CAG     |
| True-ADL 1940216..1952775      | GTGCTCGTTCTGCTGGAGGC        |
| True-ADL 1940216..1952775      | CGGCGTGTAA TGGAAC TGGCAC    |
| True-ADL 1940216..1952775      | CACGGCTGTCAGAGTGTCC         |
| True-ADL 1234151..1243860      | GTCCAAC TCGCAACACTCGG       |
| True-ADL 1234151..1243860      | GTA CTACGCCATAGGGTCC        |
| True-ADL 1234151..1243860      | GGACCTCACCCATACCACG         |
| True-ADL 1234151..1243860      | GTGCTCACTCCGATAATTCCTGC     |
| True-ADL 1243876..1250380      | GCCCAAGTGTAGCCGTCATC        |
| True-ADL 1243876..1250380      | CTGACTTGAGTACGACGCTGG       |



## References

1. Denev, V. J. & Banfield, J. F. (2012) In situ evolutionary rate measurements show ecological success of recently emerged bacterial hybrids. *Science* 336, 462–466.
2. Franzmann, P. D. *et al.* (1988) *Halobacterium lacusprofundi* sp. nov., a halophilic bacterium isolated from Deep Lake, Antarctica. *Syst. Appl. Microbiol.* 11, 20–27.
3. Ferris, J. M. & Burton, H. R. (1988) The annual cycle of heat content and mechanical stability of hypersaline Deep Lake, Vestfold Hills, Antarctica. *Hydrobiologia* 165, 115–128.
4. Mandach, von, C. & Merkl, R. (2010) Genes optimized by evolution for accurate and fast translation encode in Archaea and Bacteria a broad and characteristic spectrum of protein functions. *BMC Genomics* 11, 617.
5. Capes, M. D., DasSarma, P. & DasSarma, S. (2012) The core and unique proteins of haloarchaea. *BMC Genomics* 13, 39.
6. Touchon, M. & Rocha, E. P. (2007) Causes of insertion sequences abundance in prokaryotic genomes. *Mol Biol Evol* 24:969–981.
7. Pina, M., Bize, A., Forterre, P. & Prangishvili, D. (2011) The archeoviruses. *FEMS Microbiol. Rev.* 35, 1035–1054.
8. Pietila M. K. *et al.* (2012) Virion architecture unifies globally distributed pleolipoviruses infecting halophilic archaea. *J. Virol.* 86, 5067–5079.
9. Walsby, A. E. (1994) Gas vesicles. *Microbiol Rev* 58:94–144.
10. Bardavid, R. E., Khristo, P., & Oren, A. (2008) Interrelationships between *Dunaliella* and halophilic prokaryotes in saltern crystallizer ponds. *Extremophiles* 12, 5–14.
11. Gibson, J. A. E. (1999) The meromictic lakes and stratified marine basins of the Vestfold Hills, East Antarctica. *Antarct Sci* 11:175–192.
12. Ng, C. *et al.* (2010) Metaproteogenomic analysis of a dominant green sulfur bacterium from Ace Lake, Antarctica. *ISME J* 4:1002–1019.
13. Lauro, F. M. *et al.* (2011) An integrative study of a meromictic lake ecosystem in Antarctica. *ISME J* 5:879–895.
14. Benlloch, S. *et al.* (2001) Archaeal biodiversity in crystallizer ponds from a solar saltern: culture versus PCR. *Microb Ecol* 41:12–19.
15. Ochsenreiter, T., Pfeifer, F. & Schleper, C. (2002) Diversity of Archaea in hypersaline environments characterized by molecular-phylogenetic and cultivation studies. *Extremophiles* 6: 267–274.
16. Oh, D., Porter, K., Russ, B., Burns, D. & Dyall-Smith, M. (2010) Diversity of *Haloquadratum* and other haloarchaea in three, geographically distant, Australian saltern crystallizer ponds. *Extremophiles* 14:161–169.
17. Rusch, D. B. (2007) *et al.* The Sorcerer II Global Ocean Sampling Expedition: Northwest Atlantic through Eastern Tropical Pacific. *PLoS Biol.* 5, e77.
18. Yau, S. *et al.* (2011) Virophage control of antarctic algal host-virus dynamics. *Proc. Natl. Acad. Sci. U.S.A.* 108, 6163–6168.
19. Brown, M. V. *et al.* (2012) Global biogeography of SAR11 marine bacteria. *Mol. Syst. Biol.* 8, 595.
20. Wilkins, D. *et al.* (2012) Biogeographic partitioning of Southern Ocean microorganisms revealed by metagenomics. *Environ. Microbiol.* 15, 1318–1333.

21. Williams, T. J. *et al.* (2012) The role of planktonic Flavobacteria in processing algal organic matter in coastal East Antarctica revealed using metagenomics and metaproteomics. *Environ. Microbiol.* 15, 1302–1317.
22. Yau, S., *et al.* (2013) Metagenomic insights into strategies of carbon conservation and unusual sulfur biogeochemistry in a hypersaline Antarctic lake. *ISME J.* doi:10.1038/ismej.2013.69
23. Burns, D. G., Camakaris, H. M., Janssen, P. H. & Dyall-Smith, M. L. (2004) Cultivation of Walsby's square haloarchaeon. *FEMS Microbiol. Lett.* 238, 469–473.
24. Burns, D. G. *et al.* (2007) Haloquadratum walsbyi gen. nov., sp. nov., the square haloarchaeon of Walsby, isolated from saltern crystallizers in Australia and Spain. *Int. J. Syst. Evol. Microbiol.* 57, 387–392.
25. Dyal-Smith M.L. (2009) The Halohandbook: Protocols for halobacterial genetics. In., 7.2 edn: <http://www.haloarchaea.com/resources/halohandbook/>.
26. Margulies M. *et al.* (2005) Genome sequencing in microfabricated high-density picolitre reactors. *Nature* 437: 326-327
27. Bennett S. (2004) Solexa Ltd. Pharmacogenomics. 5:433-8.
28. Engelbrektson A, Kunin V, Wrighton KC, Zvenigorodsky N, Chen F, Ochman H *et al* (2010). Experimental factors affecting PCR-based estimates of microbial species richness and evenness. *ISME J* 4: 642–647.
29. Kunin V, Engelbrektson A, Ochman H, Hugenholtz P (2010). Wrinkles in the rare biosphere: pyrosequencing errors can lead to artificial inflation of diversity estimates. *Environ Microbiol* 12: 118.
30. Zerbino, D. and E. Birney. (2008). Velvet: Algorithms for de novo short read assembly using de Bruijn graphs. *Genome Research* 18: 821-829.
31. Ludwig, W. *et al.* (2004) ARB: a software environment for sequence data. *Nucleic Acids Res.* 32, 1363–1371.
32. McDonald, D. *et al.* (2012) An improved Greengenes taxonomy with explicit ranks for ecological and evolutionary analyses of bacteria and archaea. *ISME J.* 6, 610–618.
33. Niu, B., Zhu, Z., Fu, L., Wu, S. & Li, W. (2011) FR-HIT, a very fast program to recruit metagenomic reads to homologous reference genomes. *Bioinformatics* 27, 1704–1705.
34. Bastian, M., Heymann, S. & Jacomy, M. (2009) Gephi: An Open Source Software for Exploring and Manipulating Networks. *Proceedings of the Third International ICWSM Conference.*
35. Langmead, B., Trapnell, C., Pop, M. & Salzberg, S. L. (2009) Ultrafast and memory-efficient alignment of short DNA sequences to the human genome. *Genome Biol.* 10, R25.
36. Johnson, P. L. & Slatkin, M. (2009) Inference of microbial recombination rates from metagenomic data. *PLoS genetics* 5, e1000674.
37. Wyoker, A., Tibbetts, K., Fennell, T. Picard. (2009) <http://picard.sourceforge.net/>.
38. Gordon, D., Abajian, C. & Green, P. (1998) Consed: a graphical tool for sequence finishing. *Genome Res.* 8, 195–202.
39. Canty, A., Ripley, B., (2013) Bootstrap functions. <http://cran.r-project.org/web/packages/boot/>.

40. Sharp, P. M. & Li, W. H. (1987) The codon Adaptation Index – a measure of directional synonymous codon usage bias, and its potential applications. *Nucleic Acids Res.* 15, 1281–1295.
41. Peden, J. F. (2005) Correspondence Analysis of Codon Usage. <http://codonw.sourceforge.net/>.
42. Li, L., Stoeckert, C. J. & Roos, D. S. (2003) OrthoMCL: identification of ortholog groups for eukaryotic genomes. *Genome Res.* 13, 2178–2189.
43. Makarova, K. S., Sorokin, A. V., Novichkov, P. S., Wolf, Y. I. & Koonin, E. V. (2007) Clusters of orthologous genes for 41 archaeal genomes and implications for evolutionary genomics of archaea. *Biol. Direct* 2, 33.
44. Zhang, Z. *et al.* (2006) KaKs\_Calculator: calculating Ka and Ks through model selection and model averaging. *Genomics Proteomics Bioinformatics* 4, 259–263.
45. Allen, M. A. *et al.* (2009) The genome sequence of the psychrophilic archaeon, *Methanococcoides burtonii*: the role of genome evolution in cold adaptation. *ISME J* 3:1012–1035.
46. Fraley, C. & Raftery, A. E. (2006) Mclust: an R package for normal mixture modeling. <http://www.stat.washington.edu/mclust/>.
47. Galardini, M., Biondi, E. G., Bazzicalupo, M. & Mengoni, A. (2011) CONTIGuator: a bacterial genomes finishing tool for structural insights on draft genomes. *Source Code Biol. Med.* 6, 11.
48. DeMaere, M. Z., Lauro, F. M., Thomas, T., Yau, S. & Cavicchioli, R. (2011) Simple high-throughput annotation pipeline (SHAP). *Bioinformatics* 27, 2431–2432.
49. Richter, M. & Rosselló-Móra, R. (2009) Shifting the genomic gold standard for the prokaryotic species definition. *Proc. Natl. Acad. Sci. U.S.A.* 106, 19126–19131.
50. Edgar, R. C. (2004) MUSCLE: a multiple sequence alignment method with reduced time and space complexity. *BMC Bioinformatics* 5, 113.
51. Tillett, D. & Neilan, B. A. (2000) Xanthogenate nucleic acid isolation from cultured and environmental cyanobacteria. *J. Phycol.* 36, 251–258.
52. Wilkins, D. *et al.* Key microbial drivers in Antarctic aquatic environments. *FEMS Microbiol. Rev.* (2012). doi: 10.1111/1574-6976.12007.
53. Zwartz, D., Bird, M., Stone, J. & Lambeck, K. Holocene sea-level change and ice-sheet history in the Vestfold Hills, East Antarctica. *Earth Planet. Sci. Lett.* **155**, 131–145 (1998).
54. Bowman, J. P. J., McCammon, S. A. S., Rea, S. M. S. & McMeekin, T. A. T. The microbial composition of three limnologically disparate hypersaline Antarctic lakes. *FEMS Microbiol. Lett.* **183**, 81–88 (2000).
55. Ferris, J. M. & Burton, H. R. The annual cycle of heat content and mechanical stability of hypersaline Deep Lake, Vestfold Hills, Antarctica. *Hydrobiologia* **165**, 115–128 (1988).
56. Krzywinski, M. *et al.* (2009) Circos: an information aesthetic for comparative genomics. *Genome Res* 19:1639–1645.
